# Supplementary material for: Isatoic anhydride as a masked directing group and internal oxidant for Rh(iii)-catalyzed decarbonylative annulation through C–H activation: insights from DFT calculations
Source: Royal Society of Chemistry journal article supplement (doi:10.1039/d4cc03733b), 2024-01-01
Supplement: d4cc03733b1.pdf [file d4cc03733b1.pdf]

## Electronic Supplementary Information

Isatoic anhydride as a masked directing group and internal oxidant for  
Rh(III)-catalyzed decarbonylative annulation through C–H activation:  
insights from DFT calculations

Yanshu Luo, Maosheng Zhang, Yuanzhi Xia\*

College of Chemistry and Materials Engineering, Wenzhou University, Wenzhou 325035, China.

E-mail: xyz@wzu.edu.cn

### Content:

1. Computational Details
2. Additional Computational Results
3. Calculated Energy Values
4. Cartesian Coordinates for All Species

## 1. Computational Details

All DFT calculations were carried out with the Gaussian 09 suite of computational programs.<sup>[1]</sup> The geometries of all stationary points were optimized using the B3LYP hybrid functional<sup>[2]</sup> at the basis set level of 6-31G(d) (Lanl2dz for Rh).<sup>[3]</sup> Frequencies were analytically computed at the same level of theory to obtain the Gibbs free energies and to confirm whether the structures are minima (no imaginary frequency) or transition states (only one imaginary frequency). A thorough conformational search of key transition states and intermediates was performed with the Conformer-Rotamer Ensemble Sampling Tool (CREST) developed by Grimme and co-workers.<sup>[4]</sup> The solvent effect was evaluated by using the SMD polarizable continuum model by carrying out single point calculations at the M06/6-311+G(d,p) (SDD for Rh) level.<sup>[5,6]</sup> All transition state structures were confirmed to connect the proposed reactants and products by intrinsic reaction coordinate (IRC) calculations. The final free energies given in the paper ( $\Delta G_{\text{sol}}$ ) are the large basis set single-point energies with Gibbs free energy correction (at 298.15 K, 1 atm and 1 mol/L).

[1] Gaussian 09, Revision A.02, M. J. Frisch, G. W. Trucks, H. B. Schlegel, G. E. Scuseria, M. A. Robb, J. R. Cheeseman, G. Scalmani, V. Barone, B. Mennucci, G. A. Petersson, H. Nakatsuji, M. Caricato, X. Li, H. P. Hratchian, A. F. Izmaylov, J. Bloino, G. Zheng, J. L. Sonnenberg, M. Hada, M. Ehara, K. Toyota, R. Fukuda, J. Hasegawa, M. Ishida, T. Nakajima, Y. Honda, O. Kitao, H. Nakai, T. Vreven, J. A. Montgomery, Jr., J. E. Peralta, F. Ogliaro, M. Bearpark, J. J. Heyd, E. Brothers, K. N. Kudin, V. N. Staroverov, R. Kobayashi, J. Normand, K. Raghavachari, A. Rendell, J. C. Burant, S. S. Iyengar, J. Tomasi, M. Cossi, N. Rega, J. M. Millam, M. Klene, J. E. Knox, J. B. Cross, V. Bakken, C. Adamo, J. Jaramillo, R. Gomperts, R. E. Stratmann, O. Yazyev, A. J. Austin, R. Cammi, C. Pomelli, J. W. Ochterski, R. L. Martin, K. Morokuma, V. G. Zakrzewski, G. A. Voth, P. Salvador, J. J. Dannenberg, S. Dapprich, A. D. Daniels, Ö. Farkas, J. B. Foresman, J. V. Ortiz, J. Cioslowski, D. J. Fox, Gaussian, Inc., Wallingford CT, **2009**.

[2] (a) Becke, A. D. *J. Chem. Phys.* **1993**, *98*, 5648. (b) Becke, A. D. *J. Chem. Phys.* **1993**, *98*, 1372. (c) Lee, C.; Yang, W.; Parr, R. G. *Phys. Rev. B* **1988**, *37*, 785. (d) Stephens, P. J.; Devlin, F. J.; Chabalowski, C. F.; Frisch, M. J. *J. Phys. Chem.* **1994**, *98*, 11623.

[3] (a) Hay, P. J.; Wadt, W. R. *J. Chem. Phys.* **1985**, *82*, 270. (b) Wadt, W. R.; Hay, P. J. *J. Chem. Phys.* **1985**, *82*, 284. (c) Hay, P. J.; Wadt, W. R. *J. Chem. Phys.* **1985**, *82*, 299.

[4] (a) P. Pracht, F. Bohle and S. Grimme. *Phys. Chem. Chem. Phys.* **2020**, *22*, 7169. (b) S. Grimme. *J. Chem. Theory Comput.* **2019**, *15*, 2847.

[5] (a) Zhao, Y.; Truhlar, D. G. *Theor. Chem. Acc.* **2008**, *120*, 215. (b) Zhao, Y.; Truhlar, D. G. *Acc. Chem. Res.* **2008**, *41*, 157.

[6] (a) Szentpály, L.; Fuentealba, P.; Preuss, H.; Stoll, H. *Chem. Phys. Lett.* **1982**, *93*, 555. (b) Dolg, M.; Wedig, U.; Stoll, H.; Preuss, H. *J. Chem. Phys.* **1987**, *86*, 866. (c) Schwerdtfeger, P.; Dolg, M.; Schwarz, W. H. E.; Bowmaker, G. A.; Boyd, P. D. W. *J. Chem. Phys.* **1989**, *91*, 1762.

## 2. Additional Computational Results

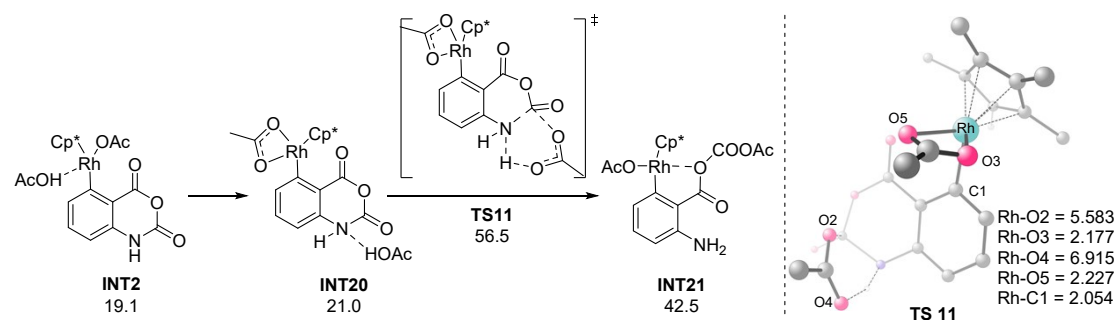

**Scheme S1** Protonation of **INT2** by HOAc. Energies and key distances are in kcal/mol and Å, respectively. Irrelevant hydrogens have been omitted for clarity.

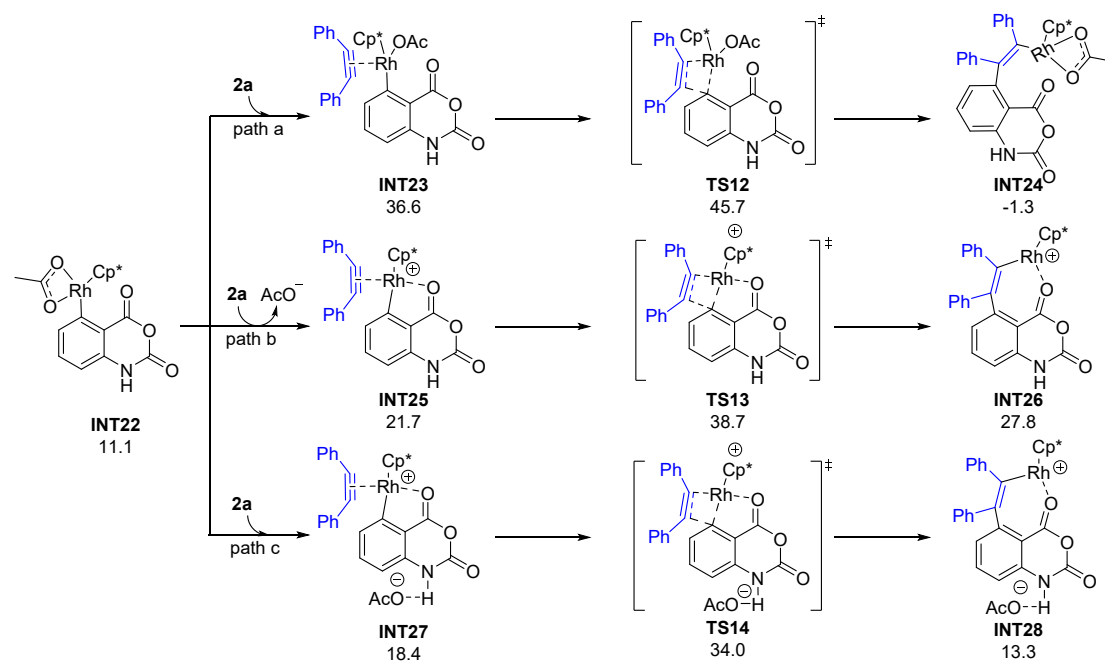

**Scheme S2** Possible reactions involving alkyne insertion starting with **INT22**. Energies are given in kcal/mol.

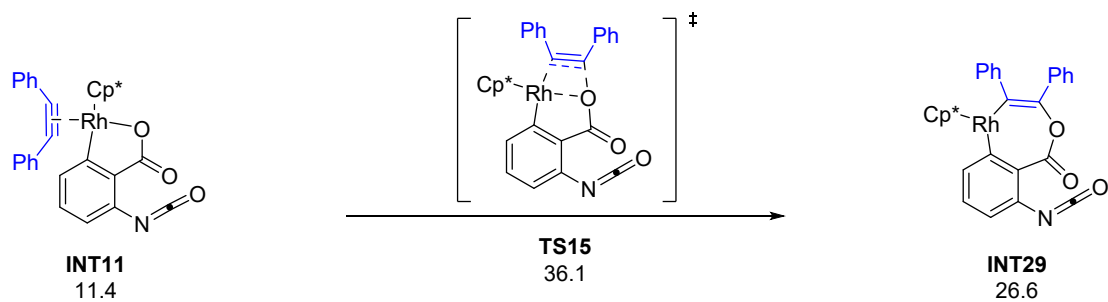

**Scheme S3** The energy of alkyne insertion into the Rh-O bond. Energies are given in kcal/mol.

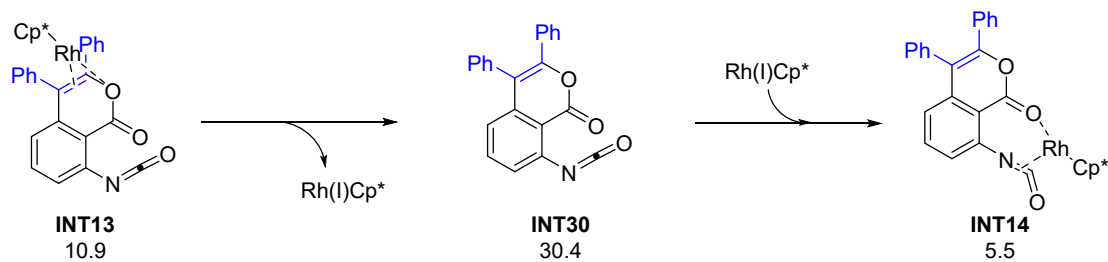

**Scheme S4** The energy of extramolecular migration pathways from **INT13** to **INT15**. Energies are given in kcal/mol.

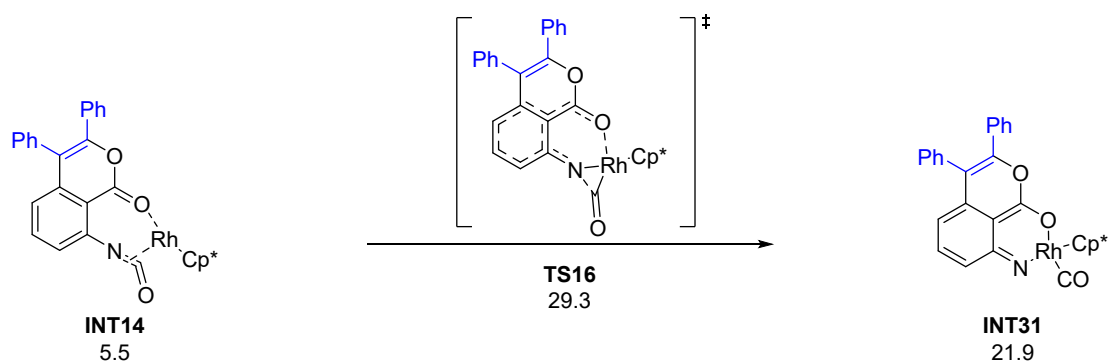

**Scheme S5** The energy of direct decarbonylation from **INT15**. Energies are given in kcal/mol.

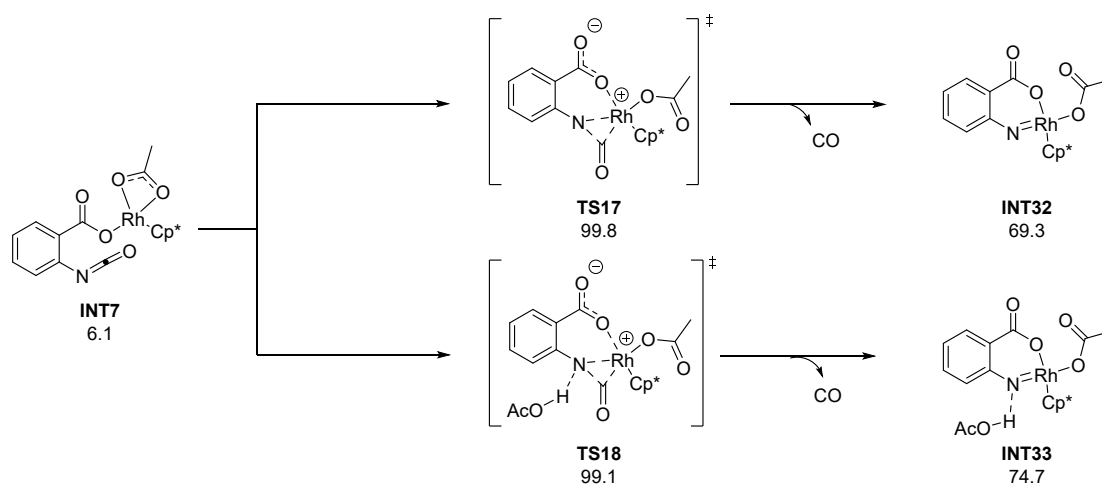

**Scheme S6** Possible decarbonylation of isocyanate moiety from INT7. Energies are given in kcal/mol.

To validate the computational method, selected key transition states and intermediates were calculated with different functionals. It was found that the structures changed only marginally, and the obtained energy profile was consistent with the reported pathway in our research.

**Table S1.** Energies for key transition states and intermediates with different methods.

| Entry | Method                                                                    | Energies (kcal/mol) |      |      |      |       |
|-------|---------------------------------------------------------------------------|---------------------|------|------|------|-------|
|       |                                                                           | TS1                 | TS2  | TS5  | TS6  | INT12 |
| 1     | (SMD)M06/6-311+G(d,p)/SDD//B3LYP/6-31G(d)/LANL2DZ (reported)              | 32.0                | 41.2 | 26.4 | 27.4 | -2.0  |
| 2     | (SMD)B3LYP-D3(BJ)/6-311+G(d,p)/SDD//B3LYP-D3(BJ)/6-31G(d)/LANL2DZ         | 28.8                | 34.1 | 24.8 | 23.9 | -1.8  |
| 3     | (SMD)B3LYP-D3(BJ)/6-311+G(d,p)/SDD// $\omega$ B97X-D/6-31G(d)/LANL2DZ     | 28.7                | 35.6 | 24.7 | 26.6 | -2.2  |
| 4     | (SMD) $\omega$ B97X-D/6-311+G(d,p)/SDD// $\omega$ B97X-D/6-31G(d)/LANL2DZ | 31.0                | 38.3 | 29.6 | 28.4 | -3.1  |
| 5     | (SMD)B3LYP-D3(BJ)/6-311+G(d,p)//<br>(SMD)B3LYP-D3(BJ)/6-31+G(d)           | 28.7                | 35.9 | 26.1 | 25.6 | -7.0  |

### 3. Calculated Energy Values

Table S2. Energies (in Hartree) calculated by (SMD)M06/6-311+G(d,p)/SDD//B3LYP/6-31G(d)/Lanl2dz level.

| Species                                  | G <sub>298</sub> <sup>a</sup> | E <sub>298</sub> <sup>b</sup> | E <sub>sol</sub> <sup>c</sup> | Imaginary Frequency |
|------------------------------------------|-------------------------------|-------------------------------|-------------------------------|---------------------|
| <b>1a</b>                                | -588.236406                   | -588.323394                   | -588.14482836                 |                     |
| <b>2a</b>                                | -539.309830                   | -539.462233                   | -539.17078022                 |                     |
| <b>AcOH</b>                              | -229.046872                   | -229.081789                   | -229.04076369                 |                     |
| <b>Cp<sup>*</sup>Rh(OAc)<sub>2</sub></b> | -956.353928                   | -956.627414                   | -957.38121781                 |                     |
| <b>CO</b>                                | -113.323559                   | -113.309452                   | -113.28106447                 |                     |
| <b>3a</b>                                | -1014.235906                  | -1014.494360                  | -1014.04479356                |                     |
| <b>AcO<sup>-</sup></b>                   | -228.477332                   | -228.497911                   | -228.56120994                 |                     |
| <b>INT1</b>                              | -1544.554768                  | -1544.933852                  | -1545.52303702                |                     |
| <b>TS1</b>                               | -1544.521246                  | -1544.901001                  | -1545.49438403                | -1194.8882          |
| <b>INT2</b>                              | -1544.547095                  | -1544.929889                  | -1545.51790513                |                     |
| <b>INT3</b>                              | -1315.933030                  | -1316.270277                  | -1316.93506956                |                     |
| <b>TS2</b>                               | -1315.880370                  | -1316.215258                  | -1316.89416155                | -961.5781           |
| <b>INT4</b>                              | -1315.907022                  | -1316.245523                  | -1316.92150974                |                     |
| <b>INT5</b>                              | -1544.573289                  | -1544.953988                  | -1545.53174490                |                     |
| <b>TS3</b>                               | -1544.563970                  | -1544.940796                  | -1545.52039594                | -220.7324           |
| <b>INT6</b>                              | -1315.524438                  | -1315.848045                  | -1316.47546987                |                     |
| <b>TS4</b>                               | -1315.502113                  | -1315.824809                  | -1316.45147468                | -215.8713           |
| <b>INT7</b>                              | -1315.523161                  | -1315.845727                  | -1316.47249242                |                     |
| <b>INT8</b>                              | -1315.525430                  | -1315.846532                  | -1316.47248281                |                     |
| <b>TS5</b>                               | -1315.480211                  | -1315.797648                  | -1316.43513163                | -1033.2322          |
| <b>INT9</b>                              | -1315.499272                  | -1315.822143                  | -1316.45878035                |                     |
| <b>INT10</b>                             | -1086.452086                  | -1086.718978                  | -1087.40328627                |                     |
| <b>INT11</b>                             | -1625.740088                  | -1626.184254                  | -1626.59825836                |                     |
| <b>TS6</b>                               | -1625.713688                  | -1626.157405                  | -1626.57224954                | -294.0378           |
| <b>INT12</b>                             | -1625.757197                  | -1626.202007                  | -1626.62032754                |                     |
| <b>TS7</b>                               | -1625.724404                  | -1626.170042                  | -1626.58197437                | -216.7656           |
| <b>INT13</b>                             | -1625.746917                  | -1626.194497                  | -1626.60254549                |                     |
| <b>INT14</b>                             | -1625.774840                  | -1626.223001                  | -1626.61172705                |                     |
| <b>INT15</b>                             | -1854.816679                  | -1855.319466                  | -1855.66250245                |                     |
| <b>TS8</b>                               | -1854.790149                  | -1855.293009                  | -1855.64088623                | -324.6920           |
| <b>INT16</b>                             | -1854.809906                  | -1855.312834                  | -1855.66157477                |                     |
| <b>TS9</b>                               | -1854.797251                  | -1855.297411                  | -1855.64848933                | -130.3769           |
| <b>INT17</b>                             | -1741.508723                  | -1742.008005                  | -1742.37154774                |                     |
| <b>INT18</b>                             | -1970.560648                  | -1971.114223                  | -1971.43253770                |                     |
| <b>TS10</b>                              | -1970.532870                  | -1971.087519                  | -1971.41388535                | -669.4845           |
| <b>INT19</b>                             | -1970.560154                  | -1971.116405                  | -1971.44167029                |                     |
| <b>INT20</b>                             | -1544.541394                  | -1544.919716                  | -1545.51048234                |                     |

|              |              |              |                |           |
|--------------|--------------|--------------|----------------|-----------|
| <b>TS11</b>  | -1544.483501 | -1544.865220 | -1545.45718868 | -291.4060 |
| <b>INT21</b> | -1544.512510 | -1544.894421 | -1545.47982916 |           |
| <b>INT22</b> | -1315.511583 | -1315.837619 | -1316.46813596 |           |
| <b>INT23</b> | -1854.745819 | -1855.250153 | -1855.62412243 |           |
| <b>TS12</b>  | -1854.731370 | -1855.236632 | -1855.61056221 | -260.9483 |
| <b>INT24</b> | -1854.813966 | -1855.322727 | -1855.68887429 |           |
| <b>INT25</b> | -1626.152973 | -1626.611639 | -1627.06148452 |           |
| <b>TS13</b>  | -1626.124086 | -1626.584492 | -1627.03615428 | -314.5244 |
| <b>INT26</b> | -1626.147895 | -1626.609937 | -1627.05520208 |           |
| <b>INT27</b> | -1854.775758 | -1855.274480 | -1855.64746179 |           |
| <b>TS14</b>  | -1854.752617 | -1855.252360 | -1855.62361940 | -282.6167 |
| <b>INT28</b> | -1854.788390 | -1855.290311 | -1855.65875735 |           |
| <b>TS15</b>  | -1625.712064 | -1626.154584 | -1626.55726784 | -251.8964 |
| <b>INT29</b> | -1625.733493 | -1626.179757 | -1626.57611454 |           |
| <b>INT30</b> | -1126.371141 | -1126.613685 | -1126.14067410 |           |
| <b>TS16</b>  | -1625.741352 | -1626.188813 | -1626.57304607 | -330.6079 |
| <b>INT31</b> | -1625.752159 | -1626.198718 | -1626.58388653 |           |
| <b>TS17</b>  | -1315.372771 | -1315.692836 | -1316.32070103 | -85.8721  |
| <b>INT32</b> | -1202.115400 | -1202.431483 | -1203.07017201 |           |
| <b>TS18</b>  | -1544.414119 | -1544.793210 | -1545.38680326 | -380.7394 |
| <b>INT33</b> | -1431.156782 | -1431.527313 | -1432.12196404 |           |

<sup>a</sup> Sum of electronic and thermal free energies

<sup>b</sup> Sum of electronic energies

<sup>c</sup> Single point energies calculated in DMF solution

## 4. Cartesian Coordinates for All Species

|           |             |             |             |                                          |             |             |             |
|-----------|-------------|-------------|-------------|------------------------------------------|-------------|-------------|-------------|
| <b>1a</b> |             |             |             | H                                        | 2.45169400  | -3.75498800 | 1.50260400  |
| C         | -7.86157500 | 4.44964400  | 4.20651700  | H                                        | 1.95435700  | -5.54538300 | -0.15009100 |
| C         | -6.86945500 | 3.90967100  | 5.01788200  |                                          |             |             |             |
| C         | -5.85032500 | 3.14431200  | 4.43647800  | <b>AcOH</b>                              |             |             |             |
| C         | -5.83846800 | 2.92940100  | 3.04932900  | C                                        | -3.46646700 | 0.42077600  | 0.03210000  |
| C         | -6.84593400 | 3.48126500  | 2.24630200  | H                                        | -3.07411000 | -0.46587500 | 0.54090400  |
| C         | -7.85705700 | 4.24032600  | 2.81977400  | H                                        | -3.17496600 | 1.32080400  | 0.57368900  |
| H         | -8.65051400 | 5.04252800  | 4.66072100  | H                                        | -3.03767200 | 0.43498000  | -0.97534400 |
| H         | -6.87932100 | 4.07602800  | 6.09168900  | C                                        | -4.97062800 | 0.34629100  | -0.04831500 |
| H         | -6.80728200 | 3.29664000  | 1.17782600  | O                                        | -5.75123100 | 1.15033300  | 0.40821200  |
| H         | -8.63862600 | 4.66898400  | 2.20082100  | O                                        | -5.37596700 | -0.76579000 | -0.71569000 |
| C         | -4.76673500 | 2.12577500  | 2.45024000  | H                                        | -6.35113900 | -0.73365900 | -0.72027000 |
| N         | -4.83447300 | 2.58164700  | 5.19725600  |                                          |             |             |             |
| H         | -4.81089600 | 2.72078300  | 6.19884000  | <b>Cp<sup>+</sup>Rh(OAc)<sub>2</sub></b> |             |             |             |
| C         | -3.79684600 | 1.81943800  | 4.70101400  | C                                        | -4.93864700 | 3.17807100  | 2.54102600  |
| O         | -3.81040700 | 1.62012900  | 3.34138400  | C                                        | -3.48628800 | 3.18103000  | 2.68810900  |
| O         | -4.63684200 | 1.86601200  | 1.28318000  | C                                        | -3.06562000 | 4.54200300  | 2.87666300  |
| O         | -2.92633500 | 1.34817000  | 5.38648500  | C                                        | -4.24130300 | 5.36693400  | 2.94260500  |
|           |             |             |             | C                                        | -5.40125700 | 4.51486300  | 2.69350800  |
| <b>2a</b> |             |             |             | C                                        | -6.81768600 | 5.00163500  | 2.63929000  |
| C         | -3.49941300 | 1.27344100  | -0.92193500 | H                                        | -7.03168800 | 5.68412700  | 3.46737700  |
| C         | -2.43587900 | 1.09775800  | -0.01360100 | H                                        | -7.00166500 | 5.54105400  | 1.70072100  |
| C         | -2.16363700 | 2.11892600  | 0.91918400  | H                                        | -7.53048900 | 4.17586400  | 2.69824500  |
| C         | -2.93399500 | 3.27816200  | 0.93936300  | C                                        | -5.76577600 | 1.95260000  | 2.29600700  |
| C         | -3.98594100 | 3.44188300  | 0.03447100  | H                                        | -6.82912900 | 2.14369300  | 2.45900200  |
| C         | -4.26440500 | 2.43606100  | -0.89445400 | H                                        | -5.63870300 | 1.60501900  | 1.26246400  |
| H         | -3.71350700 | 0.48989800  | -1.64233700 | H                                        | -5.46687600 | 1.13930200  | 2.96401600  |
| H         | -1.34536400 | 1.98863900  | 1.62076900  | C                                        | -2.58155600 | 1.99472000  | 2.55992200  |
| H         | -2.71282100 | 4.05740600  | 1.66381200  | H                                        | -3.14267200 | 1.05982900  | 2.64013700  |
| H         | -4.58521100 | 4.34808400  | 0.05313400  | H                                        | -2.07444400 | 2.00085000  | 1.58514600  |
| H         | -5.08152300 | 2.55819100  | -1.60041000 | H                                        | -1.83306200 | 2.01317100  | 3.35612900  |
| C         | -1.65029300 | -0.09091300 | -0.03792300 | C                                        | -1.64557700 | 5.00297400  | 2.99016300  |
| C         | -0.97996400 | -1.10588600 | -0.05906000 | H                                        | -1.05277800 | 4.28281900  | 3.55713600  |
| C         | -0.19453700 | -2.29473700 | -0.08340500 | H                                        | -1.21190800 | 5.11205200  | 1.98651900  |
| C         | -0.46734600 | -3.31619500 | -1.01571000 | H                                        | -1.57740500 | 5.97221200  | 3.49099600  |
| C         | 0.86941400  | -2.47026800 | 0.82446400  | C                                        | -4.28519600 | 6.85629900  | 3.10317600  |
| C         | 0.30285100  | -4.47553900 | -1.03587900 | H                                        | -4.30355200 | 7.35084200  | 2.12197300  |
| H         | -1.28593100 | -3.18604800 | -1.71694600 | H                                        | -5.17842300 | 7.17031900  | 3.65101900  |
| C         | 1.63424700  | -3.63299500 | 0.79700300  | H                                        | -3.41296900 | 7.22551400  | 3.64836200  |
| H         | 1.08396700  | -1.68651400 | 1.54449800  | Rh                                       | -4.37884900 | 3.90890900  | 4.55261400  |
| C         | 1.35521400  | -4.63909700 | -0.13144500 | C                                        | -5.89846300 | 3.16929400  | 6.45400000  |
| H         | 0.08122600  | -5.25499800 | -1.75996100 | C                                        | -6.65759800 | 2.76515700  | 7.69161900  |



|           |              |             |            |             |             |             |             |
|-----------|--------------|-------------|------------|-------------|-------------|-------------|-------------|
| H         | -7.55680300  | 3.37564800  | 7.80493300 | H           | -5.14988500 | 8.59380200  | 2.44981400  |
| H         | -6.91622300  | 1.70425000  | 7.65318800 | C           | -3.10521200 | 2.75912900  | 2.83368200  |
| H         | -6.01769300  | 2.93208200  | 8.56602400 | C           | -2.17944000 | 2.00691600  | 3.58019700  |
| C         | -1.31734500  | 3.92662300  | 7.61882500 | C           | -2.62215300 | 3.77963100  | 1.99727200  |
| H         | -0.27507800  | 3.60232300  | 7.58360600 | C           | -0.81715900 | 2.28841800  | 3.51416400  |
| H         | -1.83871700  | 3.36549000  | 8.40310500 | H           | -2.53677000 | 1.19895000  | 4.20906800  |
| H         | -1.37743800  | 4.98725200  | 7.88065100 | C           | -1.25744400 | 4.05262600  | 1.92952600  |
| C         | -1.99443000  | 3.65737900  | 6.27583400 | H           | -3.31088100 | 4.35183200  | 1.38780800  |
| O         | -3.13782000  | 4.27507000  | 6.16265500 | C           | -0.34972400 | 3.31433000  | 2.69067800  |
| O         | -1.47296300  | 2.91717700  | 5.43882000 | H           | -0.11931600 | 1.70138300  | 4.10512400  |
| O         | -5.93833600  | 4.36944600  | 6.03363700 | H           | -0.90320800 | 4.84159800  | 1.27161000  |
| O         | -5.17900900  | 2.32184200  | 5.83301800 | H           | 0.71372200  | 3.53130200  | 2.63632300  |
|           |              |             |            | H           | -7.69209000 | -1.27887100 | 3.45676900  |
| <b>CO</b> |              |             |            |             |             |             |             |
| C         | -4.75769800  | 2.10770200  | 2.36904200 | <b>AcO</b>  |             |             |             |
| O         | -4.63479200  | 1.86191200  | 1.26476100 | C           | -3.46778600 | 0.42209800  | 0.03285000  |
|           |              |             |            | H           | -3.04524400 | -0.45359400 | 0.54730200  |
| <b>3a</b> |              |             |            | H           | -3.18099000 | 1.33011000  | 0.57886000  |
| C         | -9.37748400  | 2.83893600  | 3.03546400 | H           | -3.00883800 | 0.44559700  | -0.96661400 |
| C         | -9.51792100  | 1.46942500  | 3.20255700 | C           | -5.03093500 | 0.27098100  | -0.09440300 |
| C         | -8.38213300  | 0.63813100  | 3.27989900 | O           | -5.71450400 | 1.18554600  | 0.43022400  |
| C         | -7.09088400  | 1.24335500  | 3.15807800 | O           | -5.40274400 | -0.75921900 | -0.71266300 |
| C         | -6.96651900  | 2.65129000  | 2.97390900 |             |             |             |             |
| C         | -8.12370500  | 3.44081800  | 2.92679700 | <b>INT1</b> |             |             |             |
| H         | -10.26937800 | 3.45922900  | 2.99168900 | C           | -3.18592200 | 0.54060700  | -2.21696200 |
| H         | -10.50499500 | 1.02261200  | 3.29118700 | C           | -1.84199800 | 1.02608000  | -1.92862200 |
| H         | -8.04589800  | 4.51385300  | 2.80918700 | C           | -1.94071500 | 2.45395500  | -1.64821400 |
| C         | -5.90202100  | 0.41744000  | 3.23004000 | C           | -3.31762500 | 2.79751800  | -1.62273300 |
| N         | -8.52286300  | -0.69913600 | 3.49013900 | C           | -4.09539900 | 1.60435300  | -1.97790900 |
| H         | -9.43756100  | -1.11753500 | 3.42985000 | C           | -5.58629700 | 1.50577500  | -2.09059200 |
| O         | -5.84856200  | -0.79457700 | 3.38265100 | H           | -6.07844000 | 2.36702300  | -1.63140500 |
| O         | -4.68830400  | 1.06264500  | 3.10914500 | H           | -5.89587400 | 1.46773000  | -3.14379300 |
| C         | -5.63012600  | 3.23545800  | 2.86042000 | H           | -5.93578000 | 0.60227000  | -1.58225700 |
| C         | -4.54343600  | 2.41593400  | 2.92276000 | C           | -3.55117000 | -0.84281300 | -2.65861800 |
| C         | -5.49001700  | 4.71897700  | 2.74048900 | H           | -4.45727900 | -1.18201200 | -2.15240400 |
| C         | -4.99415900  | 5.47659700  | 3.81109500 | H           | -3.72202000 | -0.85453500 | -3.74396900 |
| C         | -5.87336700  | 5.38626900  | 1.56583700 | H           | -2.75250800 | -1.55554500 | -2.43860900 |
| C         | -4.87012000  | 6.86246200  | 3.70658800 | C           | -0.56921300 | 0.25294100  | -2.09140000 |
| H         | -4.70051800  | 4.97125300  | 4.72668200 | H           | -0.72375900 | -0.80939900 | -1.88591800 |
| C         | -5.75004800  | 6.77226400  | 1.46082600 | H           | -0.18209500 | 0.34995700  | -3.11536700 |
| H         | -6.26446000  | 4.81119000  | 0.73057600 | H           | 0.19852500  | 0.61295600  | -1.40159900 |
| C         | -5.24633000  | 7.51445700  | 2.53119100 | C           | -0.79345700 | 3.38076200  | -1.38852200 |
| H         | -4.48077400  | 7.43269400  | 4.54582500 | H           | 0.07229200  | 2.83856200  | -1.00062700 |
| H         | -6.04600200  | 7.27155300  | 0.54189400 | H           | -0.49162700 | 3.87654500  | -2.32146400 |

|            |             |             |             |    |             |             |             |
|------------|-------------|-------------|-------------|----|-------------|-------------|-------------|
| H          | -1.06526800 | 4.14382900  | -0.65630900 | C  | -2.34507600 | 3.40493000  | -0.15360300 |
| C          | -3.86240800 | 4.15410700  | -1.29246900 | H  | -2.78357300 | 2.92152300  | -1.03105400 |
| H          | -3.71356200 | 4.84765800  | -2.13078700 | H  | -1.38896200 | 3.85473400  | -0.45249700 |
| H          | -4.93370900 | 4.11219900  | -1.08093000 | H  | -2.14861300 | 2.62432100  | 0.58388200  |
| H          | -3.35839900 | 4.55370500  | -0.40773100 | C  | -2.88692000 | 4.10554400  | 2.93968500  |
| Rh         | -2.93022900 | 1.21170800  | -0.11121600 | H  | -2.48910300 | 3.11328500  | 2.71915200  |
| C          | -4.17457900 | -1.30470500 | 0.74373300  | H  | -2.04356200 | 4.74228500  | 3.24120600  |
| C          | -4.13836000 | -2.60387400 | 1.54946400  | H  | -3.55967200 | 4.02791000  | 3.79698400  |
| H          | -5.08800600 | -3.13459400 | 1.45238900  | C  | -5.05970700 | 6.43358100  | 3.06107000  |
| H          | -3.31904000 | -3.24148800 | 1.20012700  | H  | -5.16577200 | 5.70909300  | 3.87283500  |
| H          | -3.94260500 | -2.38069400 | 2.60371600  | H  | -4.36988900 | 7.21928200  | 3.39967500  |
| C          | -0.35320800 | 2.76334100  | 3.01802800  | H  | -6.03761700 | 6.89534900  | 2.90137900  |
| H          | -0.15600100 | 3.80337800  | 3.28965600  | C  | -5.63744000 | 7.39002300  | 0.04813200  |
| H          | 0.57114100  | 2.27162000  | 2.70095300  | H  | -6.39192800 | 7.62529800  | 0.80346600  |
| H          | -0.72529900 | 2.22507100  | 3.89750100  | H  | -5.00563500 | 8.28001500  | -0.08157900 |
| C          | -1.41165900 | 2.69746600  | 1.91862900  | H  | -6.14606600 | 7.17878700  | -0.89395700 |
| O          | -1.45435700 | 1.54148700  | 1.32956600  | C  | -3.97606400 | 5.51678800  | -1.91938600 |
| O          | -2.14664300 | 3.66825700  | 1.68327800  | H  | -3.38164800 | 6.39749900  | -2.19992300 |
| O          | -5.19083100 | -0.96768800 | 0.12423900  | H  | -3.50995600 | 4.63877500  | -2.37316300 |
| O          | -3.05230300 | -0.65028300 | 0.80718100  | H  | -4.98524900 | 5.61827200  | -2.32603200 |
| C          | -7.88550000 | 4.40932400  | 4.21207300  | Rh | -5.46634300 | 4.11938900  | 0.66496500  |
| C          | -6.88539200 | 3.88323200  | 5.02256900  | C  | -6.27202400 | 1.53925000  | -0.59191800 |
| C          | -5.85712100 | 3.13255800  | 4.43889800  | C  | -6.25399800 | 0.45640700  | -1.64851200 |
| C          | -5.83986800 | 2.92104000  | 3.05076500  | H  | -7.24490500 | 0.00580000  | -1.74344400 |
| C          | -6.85659500 | 3.45877700  | 2.24857700  | H  | -5.92226900 | 0.86011200  | -2.60683200 |
| C          | -7.87887700 | 4.19992600  | 2.82467300  | H  | -5.55454500 | -0.32541900 | -1.33034000 |
| H          | -8.68317000 | 4.98996600  | 4.66659100  | C  | -9.40257600 | 4.83678800  | -1.09459700 |
| H          | -6.89611900 | 4.04826800  | 6.09639300  | H  | -9.70316900 | 5.25903900  | -2.05553500 |
| H          | -6.82042900 | 3.27480900  | 1.18056600  | H  | -9.87441100 | 5.39709400  | -0.27998300 |
| H          | -8.66881400 | 4.61508900  | 2.20730000  | H  | -9.75145300 | 3.80112900  | -1.02030300 |
| C          | -4.74795500 | 2.14058200  | 2.46961900  | C  | -7.88042700 | 4.87912800  | -0.95723500 |
| N          | -4.83236600 | 2.58323700  | 5.19720200  | O  | -7.47964400 | 4.43542100  | 0.20424300  |
| H          | -4.79333800 | 2.74336000  | 6.19530400  | O  | -7.17023500 | 5.29879000  | -1.87103500 |
| C          | -3.79938000 | 1.82124200  | 4.69984800  | O  | -6.99973700 | 1.35215900  | 0.43324900  |
| O          | -3.83824000 | 1.59454400  | 3.33803700  | O  | -5.54186000 | 2.55663900  | -0.77558900 |
| O          | -4.61919100 | 1.93057900  | 1.27853000  | C  | -7.72127500 | 3.61134300  | 4.37169100  |
| O          | -2.91352300 | 1.36103800  | 5.37081900  | C  | -6.94716600 | 2.84902000  | 5.23860500  |
|            |             |             |             | C  | -5.90712000 | 2.07028700  | 4.71404700  |
| <b>TSI</b> |             |             |             | C  | -5.62564700 | 2.09234700  | 3.33557900  |
| C          | -3.56450400 | 4.71481000  | 1.75155600  | C  | -6.39816700 | 2.88669300  | 2.44329400  |
| C          | -4.55096800 | 5.78468400  | 1.80862500  | C  | -7.45794800 | 3.62172400  | 2.99555900  |
| C          | -4.78450900 | 6.23186800  | 0.46281700  | H  | -8.54266500 | 4.20032000  | 4.77260000  |
| C          | -4.03849200 | 5.38425600  | -0.42949700 | H  | -7.15283400 | 2.83153200  | 6.30604200  |
| C          | -3.27254500 | 4.45047200  | 0.38487600  | H  | -6.66397500 | 2.23864700  | 1.29762200  |

|             |             |             |             |             |             |             |             |
|-------------|-------------|-------------|-------------|-------------|-------------|-------------|-------------|
| H           | -8.08515200 | 4.19980200  | 2.32557200  | H           | -9.73893600 | 3.62239600  | -0.82725900 |
| C           | -4.54624300 | 1.22628600  | 2.84048400  | C           | -7.91423200 | 4.76674800  | -0.67607700 |
| N           | -5.14358300 | 1.26308000  | 5.55320800  | O           | -7.47446300 | 4.28764400  | 0.47543200  |
| H           | -5.35009800 | 1.22427900  | 6.54264200  | O           | -7.21530000 | 5.23044000  | -1.56901400 |
| C           | -4.12200300 | 0.43732100  | 5.14684400  | O           | -7.59543100 | 1.70000600  | 0.17841300  |
| O           | -3.86121900 | 0.46341800  | 3.79963400  | O           | -5.46541200 | 2.29146300  | -0.27467200 |
| O           | -4.16779100 | 1.11095500  | 1.70116500  | C           | -7.56897000 | 3.50691500  | 4.50197000  |
| O           | -3.48003100 | -0.26240400 | 5.88976100  | C           | -7.08293300 | 2.35212200  | 5.10385700  |
|             |             |             |             | C           | -6.03848600 | 1.66807300  | 4.48272100  |
| <b>INT2</b> |             |             |             | C           | -5.46233500 | 2.14135200  | 3.27670900  |
| C           | -3.48224200 | 5.05085500  | 1.72886000  | C           | -5.97248500 | 3.31259500  | 2.64973900  |
| C           | -4.51898600 | 6.05936500  | 1.65735400  | C           | -7.03066400 | 3.96873500  | 3.29798100  |
| C           | -4.73934100 | 6.36606200  | 0.24516300  | H           | -8.38645800 | 4.04984200  | 4.97086000  |
| C           | -3.96569900 | 5.48354600  | -0.53085200 | H           | -7.50583600 | 1.97772800  | 6.03244000  |
| C           | -3.20442200 | 4.64145900  | 0.38723600  | H           | -7.65012000 | 2.67237100  | 0.45990200  |
| C           | -2.21329600 | 3.61222800  | -0.05968600 | H           | -7.46794500 | 4.84663000  | 2.83634600  |
| H           | -2.67935000 | 2.89729100  | -0.74505400 | C           | -4.32634800 | 1.37919800  | 2.73936500  |
| H           | -1.38612800 | 4.10155600  | -0.59142100 | N           | -5.55142600 | 0.49736800  | 5.06156600  |
| H           | -1.80904600 | 3.04383700  | 0.77685400  | H           | -5.97763400 | 0.14615200  | 5.90883800  |
| C           | -2.76502800 | 4.61493300  | 2.97134100  | C           | -4.57100100 | -0.30478900 | 4.53690600  |
| H           | -2.36126500 | 3.60651900  | 2.86714200  | O           | -4.00097200 | 0.17366100  | 3.38710500  |
| H           | -1.92921100 | 5.29726500  | 3.17978200  | O           | -3.62163600 | 1.66149000  | 1.80171500  |
| H           | -3.42640800 | 4.62650700  | 3.84200500  | O           | -4.20767100 | -1.34707100 | 5.02547900  |
| C           | -5.02488900 | 6.88035000  | 2.80645200  |             |             |             |             |
| H           | -5.07815600 | 6.29284400  | 3.72674300  | <b>INT3</b> |             |             |             |
| H           | -4.36132600 | 7.73706800  | 2.99121200  | C           | -3.55962900 | 0.91049800  | -1.37720000 |
| H           | -6.02489500 | 7.27653400  | 2.60635600  | C           | -2.17114100 | 0.86490300  | -1.04493600 |
| C           | -5.62369200 | 7.46603600  | -0.25242000 | C           | -1.52766200 | 2.02559500  | -1.65215600 |
| H           | -6.52948200 | 7.55807300  | 0.35421100  | C           | -2.53539200 | 2.75020300  | -2.39505800 |
| H           | -5.08595200 | 8.42292300  | -0.18597100 | C           | -3.80055300 | 2.09601300  | -2.18613600 |
| H           | -5.92962700 | 7.30112500  | -1.28478000 | C           | -5.11302700 | 2.49087100  | -2.79030700 |
| C           | -3.91408500 | 5.41547400  | -2.02842500 | H           | -5.18161700 | 3.57197400  | -2.93524200 |
| H           | -3.23980900 | 6.18033600  | -2.43821000 | H           | -5.23624700 | 2.01359300  | -3.77162000 |
| H           | -3.54814400 | 4.44116400  | -2.36458000 | H           | -5.95367200 | 2.18146600  | -2.16401600 |
| H           | -4.91099200 | 5.56306300  | -2.45066500 | C           | -4.59182200 | -0.11019800 | -1.01447000 |
| Rh          | -5.35674200 | 4.20948000  | 0.88327600  | H           | -5.56792200 | 0.34760200  | -0.83119800 |
| C           | -6.39304600 | 1.47623600  | -0.31417700 | H           | -4.71326700 | -0.81137300 | -1.85116800 |
| C           | -6.22899800 | 0.12185500  | -0.95043500 | H           | -4.30548600 | -0.68654600 | -0.13302200 |
| H           | -6.82252000 | 0.07775000  | -1.87049300 | C           | -1.48325600 | -0.17906000 | -0.22343000 |
| H           | -5.17860600 | -0.05823100 | -1.17942800 | H           | -2.15177900 | -0.62337300 | 0.51800400  |
| H           | -6.60859100 | -0.65305600 | -0.27752900 | H           | -1.11623800 | -0.98220000 | -0.87681800 |
| C           | -9.43137000 | 4.67472300  | -0.81097500 | H           | -0.62210300 | 0.23745500  | 0.30540700  |
| H           | -9.75632500 | 5.15900100  | -1.73372000 | C           | -0.06104000 | 2.32400100  | -1.62420700 |
| H           | -9.92051900 | 5.14112200  | 0.05044900  | H           | 0.38012300  | 2.07681500  | -0.65517400 |

|            |             |             |             |             |             |             |             |
|------------|-------------|-------------|-------------|-------------|-------------|-------------|-------------|
| H          | 0.45512700  | 1.72884300  | -2.38922600 | H           | -1.21115300 | 5.20443100  | 2.81136100  |
| H          | 0.13857100  | 3.37796000  | -1.83107200 | H           | -2.51422000 | 4.58240300  | 3.83159500  |
| C          | -2.30201500 | 3.98733300  | -3.20136600 | C           | -4.78187900 | 6.22059800  | 3.16823400  |
| H          | -1.95140600 | 3.71024400  | -4.20452100 | H           | -4.43842300 | 5.68376200  | 4.05556900  |
| H          | -3.21579100 | 4.57445400  | -3.31551000 | H           | -4.42787000 | 7.25690000  | 3.24901600  |
| H          | -1.54293800 | 4.62764600  | -2.74514400 | H           | -5.87344700 | 6.24035000  | 3.18574200  |
| Rh         | -2.98485400 | 2.75726800  | -0.25743600 | C           | -6.09987500 | 6.51727400  | 0.26186100  |
| C          | -1.49551500 | 5.55532200  | 2.24254900  | H           | -6.80032100 | 6.52760900  | 1.10030300  |
| H          | -1.17027100 | 6.44118000  | 1.69149300  | H           | -5.83760900 | 7.56018600  | 0.03844500  |
| H          | -0.68013200 | 5.16359200  | 2.85417900  | H           | -6.61843400 | 6.11098500  | -0.61010700 |
| H          | -2.31662100 | 5.85484800  | 2.90460600  | C           | -4.13340800 | 5.10835700  | -1.86160500 |
| C          | -1.98868600 | 4.50475300  | 1.29029400  | H           | -5.08488000 | 5.54594100  | -2.16970300 |
| O          | -1.83025400 | 3.26133600  | 1.53046100  | H           | -3.32729600 | 5.66655300  | -2.35322300 |
| O          | -2.60954000 | 4.82644900  | 0.22146000  | H           | -4.10050000 | 4.07491600  | -2.22071400 |
| C          | -7.24690500 | 2.91773200  | 5.54711700  | Rh          | -4.70770800 | 3.60644200  | 1.00750000  |
| C          | -6.57065400 | 1.70957100  | 5.41254700  | C           | -6.36444500 | 1.75644500  | -0.63678600 |
| C          | -5.78751900 | 1.49100400  | 4.27455700  | C           | -6.65213300 | 0.90724000  | -1.85281700 |
| C          | -5.69004900 | 2.48942600  | 3.28425900  | H           | -7.72884600 | 0.85461200  | -2.02617900 |
| C          | -6.38049600 | 3.70614000  | 3.43798000  | H           | -6.13504400 | 1.29601500  | -2.73151700 |
| C          | -7.15735400 | 3.91895500  | 4.56512800  | H           | -6.28944700 | -0.10887700 | -1.65785200 |
| H          | -7.85465000 | 3.08503200  | 6.43122300  | O           | -7.18538900 | 1.75706700  | 0.31958500  |
| H          | -6.64717100 | 0.94334700  | 6.17841700  | O           | -5.27003700 | 2.42328500  | -0.63332400 |
| H          | -6.28830100 | 4.45920500  | 2.66265800  | C           | -7.99081000 | 3.67739500  | 4.23967400  |
| H          | -7.69360400 | 4.85326200  | 4.69153100  | C           | -7.39393200 | 2.80377200  | 5.14376400  |
| C          | -4.85684500 | 2.23206500  | 2.12862900  | C           | -6.29453100 | 2.04059500  | 4.72174200  |
| N          | -5.09442600 | 0.29770600  | 4.08856400  | C           | -5.81293200 | 2.20034400  | 3.41634700  |
| H          | -5.16364500 | -0.44133800 | 4.77858500  | C           | -6.42979300 | 3.05871500  | 2.46984800  |
| C          | -4.32166700 | -0.00052600 | 3.00047000  | C           | -7.52902400 | 3.79898900  | 2.91627200  |
| O          | -4.22188700 | 1.02818300  | 2.06225100  | H           | -8.85243600 | 4.25526100  | 4.56191900  |
| O          | -4.67531400 | 3.01087100  | 1.19200400  | H           | -7.78015500 | 2.70118100  | 6.15364900  |
| O          | -3.74929800 | -1.03597400 | 2.79100600  | H           | -6.65891100 | 2.55103700  | 1.31008400  |
|            |             |             |             | H           | -8.07839600 | 4.42782600  | 2.22120200  |
| <b>TS2</b> |             |             |             | C           | -4.61618000 | 1.48820700  | 3.03247600  |
| C          | -3.03739100 | 4.88666800  | 1.75932800  | N           | -5.64869100 | 1.12886600  | 5.54506200  |
| C          | -4.25497100 | 5.60965700  | 1.90710200  | H           | -5.98870200 | 0.95568400  | 6.48403600  |
| C          | -4.86088400 | 5.73910800  | 0.58297200  | C           | -4.60083100 | 0.31694000  | 5.16537200  |
| C          | -3.95152300 | 5.16176800  | -0.37844700 | O           | -4.10506900 | 0.56245000  | 3.87117300  |
| C          | -2.85973400 | 4.57020800  | 0.34310700  | O           | -4.00654500 | 1.70975600  | 1.97793600  |
| C          | -1.68072100 | 3.87066100  | -0.25739700 | O           | -4.09002700 | -0.52489500 | 5.84157000  |
| H          | -1.93242600 | 3.42293600  | -1.22178300 |             |             |             |             |
| H          | -0.86240000 | 4.58511700  | -0.42080700 | <b>INT4</b> |             |             |             |
| H          | -1.30541500 | 3.07899400  | 0.39649100  | C           | -3.10081800 | 5.12791100  | 1.80083900  |
| C          | -2.06778000 | 4.51774500  | 2.83669300  | C           | -4.32142900 | 5.87953600  | 1.66248800  |
| H          | -1.67949200 | 3.50489100  | 2.69580800  | C           | -4.76119900 | 5.72006000  | 0.30258500  |

|    |             |             |             |             |             |             |             |
|----|-------------|-------------|-------------|-------------|-------------|-------------|-------------|
| C  | -3.69333400 | 5.03808200  | -0.44846000 | O           | -3.97484200 | 0.25849900  | 3.49826600  |
| C  | -2.68793100 | 4.67690300  | 0.45898000  | O           | -3.78149300 | 1.80601200  | 1.91276200  |
| C  | -1.42611500 | 3.91791600  | 0.18910800  | O           | -4.15734800 | -1.31266600 | 5.09858900  |
| H  | -1.38960500 | 3.53716000  | -0.83345200 |             |             |             |             |
| H  | -0.55391700 | 4.56647400  | 0.34087300  | <b>INT5</b> |             |             |             |
| H  | -1.32546600 | 3.06579400  | 0.86950700  | C           | -2.69368400 | 8.60856000  | 0.22476600  |
| C  | -2.24326300 | 5.03562500  | 3.02577200  | C           | -1.65155000 | 8.90184200  | 1.15105700  |
| H  | -1.71579500 | 4.07867800  | 3.07218000  | C           | -2.19200100 | 9.80249300  | 2.15686400  |
| H  | -1.48458100 | 5.82991000  | 3.01421800  | C           | -3.54400200 | 10.17424000 | 1.74242400  |
| H  | -2.82941700 | 5.14939700  | 3.94119700  | C           | -3.86411900 | 9.41592300  | 0.58813700  |
| C  | -4.96643600 | 6.72194600  | 2.71816100  | C           | -5.15222600 | 9.42611200  | -0.17467700 |
| H  | -4.83814000 | 6.29922400  | 3.71725700  | H           | -5.96238100 | 9.86454100  | 0.41267100  |
| H  | -4.50396400 | 7.71796800  | 2.71518300  | H           | -5.04458100 | 10.01170700 | -1.09787200 |
| H  | -6.03525300 | 6.85958800  | 2.53788400  | H           | -5.44549200 | 8.40992300  | -0.45316200 |
| C  | -5.96088500 | 6.35865300  | -0.32820100 | C           | -2.63979600 | 7.68506900  | -0.95353000 |
| H  | -6.76685800 | 6.51469100  | 0.39334700  | H           | -3.45616900 | 6.95757300  | -0.90590500 |
| H  | -5.69160200 | 7.34016200  | -0.74160600 | H           | -2.73421000 | 8.24752500  | -1.89147000 |
| H  | -6.35010900 | 5.75266800  | -1.15091300 | H           | -1.70091100 | 7.12736000  | -0.98372600 |
| C  | -3.75681700 | 4.75186600  | -1.91664600 | C           | -0.28769600 | 8.28747200  | 1.20877200  |
| H  | -4.67158600 | 4.20600600  | -2.17185200 | H           | -0.24836000 | 7.55749100  | 2.02770500  |
| H  | -3.75799200 | 5.68791100  | -2.48886700 | H           | -0.04217900 | 7.76817100  | 0.27935300  |
| H  | -2.90631700 | 4.15408700  | -2.25039500 | H           | 0.47532700  | 9.05354500  | 1.38542100  |
| Rh | -4.66178600 | 3.74302100  | 1.22556300  | C           | -1.43401200 | 10.39015100 | 3.30725700  |
| C  | -6.91437800 | 1.97923800  | -0.28403700 | H           | -0.60246000 | 9.74370900  | 3.59952700  |
| C  | -7.38841600 | 1.17831600  | -1.46029500 | H           | -1.02607400 | 11.37581900 | 3.04410500  |
| H  | -8.35939100 | 1.55293900  | -1.79922600 | H           | -2.08220600 | 10.51015000 | 4.17955700  |
| H  | -6.65758000 | 1.22671400  | -2.26701300 | C           | -4.42855700 | 11.15866300 | 2.44395700  |
| H  | -7.53156000 | 0.13636600  | -1.15342100 | H           | -4.31448900 | 12.15657100 | 1.99947400  |
| O  | -7.78930400 | 2.04378200  | 0.70599600  | H           | -5.47958300 | 10.86756700 | 2.37898400  |
| O  | -5.80354500 | 2.52171800  | -0.25032900 | H           | -4.16984300 | 11.23189200 | 3.50304300  |
| C  | -7.66703000 | 3.45493600  | 4.49359600  | Rh          | -3.36864800 | 8.02902200  | 2.25659900  |
| C  | -7.25454400 | 2.28603900  | 5.12846900  | C           | -5.33981500 | 8.48039100  | 4.53618300  |
| C  | -6.15100100 | 1.60208000  | 4.60454800  | C           | -5.59076000 | 8.76909500  | 6.01210100  |
| C  | -5.50169700 | 2.12108700  | 3.47445100  | H           | -5.83817700 | 7.82491900  | 6.51226800  |
| C  | -5.89576900 | 3.31616300  | 2.82343800  | H           | -4.70606100 | 9.18853000  | 6.49620400  |
| C  | -7.00873100 | 3.97099400  | 3.35650200  | H           | -6.44518000 | 9.44251600  | 6.12167400  |
| H  | -8.52748800 | 3.98673500  | 4.89083300  | C           | -1.50123200 | 4.75255000  | 4.41935100  |
| H  | -7.77926400 | 1.91149700  | 6.00199500  | H           | -0.72213500 | 4.49442900  | 3.69459700  |
| H  | -7.41073600 | 2.56930000  | 1.44728100  | H           | -1.91913100 | 3.84275100  | 4.85491200  |
| H  | -7.38094400 | 4.88915400  | 2.91147400  | H           | -1.03125500 | 5.35178800  | 5.20760100  |
| C  | -4.38519800 | 1.40652300  | 2.91954800  | C           | -2.60887700 | 5.56306400  | 3.74871800  |
| N  | -5.65597500 | 0.41949500  | 5.13557300  | O           | -3.79033700 | 5.24173900  | 3.85243500  |
| H  | -6.08745300 | 0.00344300  | 5.95283500  | O           | -2.13840900 | 6.59384500  | 3.08934600  |
| C  | -4.58396300 | -0.29463400 | 4.64059300  | O           | -6.31753200 | 8.41433500  | 3.75477800  |

|            |             |             |             |             |              |             |             |
|------------|-------------|-------------|-------------|-------------|--------------|-------------|-------------|
| O          | -4.10979400 | 8.30045900  | 4.22744900  | H           | -5.07974500  | 10.60048600 | 3.20243200  |
| C          | -9.00885700 | 4.55076400  | 4.82455200  | Rh          | -3.25215600  | 7.86918900  | 2.48032400  |
| C          | -8.18056500 | 5.48891800  | 4.22077100  | C           | -4.65288200  | 7.89731200  | 5.36755500  |
| C          | -7.26151500 | 5.05990900  | 3.25206700  | C           | -4.34965700  | 8.32433600  | 6.78387800  |
| C          | -7.18252800 | 3.70223800  | 2.90429700  | H           | -3.54940100  | 7.66602400  | 7.14104300  |
| C          | -8.02722400 | 2.76912000  | 3.52371400  | H           | -3.99142700  | 9.35566500  | 6.81024400  |
| C          | -8.93992800 | 3.19014900  | 4.48068700  | H           | -5.22110600  | 8.19636800  | 7.42951900  |
| H          | -9.72071900 | 4.87955900  | 5.57693200  | C           | -0.34988800  | 5.50631100  | 4.72201800  |
| H          | -8.21823700 | 6.54161400  | 4.48357500  | H           | -0.10084200  | 4.79556300  | 3.92581300  |
| H          | -7.94276800 | 1.72652000  | 3.23529500  | H           | -0.40604700  | 4.97499800  | 5.67424900  |
| H          | -9.59619500 | 2.47275000  | 4.96354200  | H           | 0.44910300   | 6.25424000  | 4.75684000  |
| C          | -6.21593700 | 3.27835000  | 1.89129100  | C           | -1.69698200  | 6.16343400  | 4.41789800  |
| N          | -6.42691600 | 5.96486700  | 2.61664800  | O           | -2.69034400  | 5.93514700  | 5.09754800  |
| H          | -6.38478000 | 6.95184600  | 2.95381400  | O           | -1.62681800  | 6.95521000  | 3.37091400  |
| C          | -5.45406100 | 5.59753000  | 1.76369800  | O           | -5.55470100  | 6.99553200  | 5.24835700  |
| O          | -5.41156200 | 4.30438000  | 1.35791500  | O           | -4.02197100  | 8.45443500  | 4.43405400  |
| O          | -6.04832400 | 2.16649300  | 1.46348400  | C           | -9.62124300  | 5.07496800  | 4.11058900  |
| O          | -4.64889600 | 6.38590200  | 1.25711900  | C           | -8.35450700  | 5.64226100  | 4.10763100  |
|            |             |             |             | C           | -7.41752200  | 5.26194100  | 3.12611700  |
| <b>TS3</b> |             |             |             | C           | -7.79589800  | 4.30189900  | 2.16477600  |
| C          | -2.78669800 | 8.14867900  | 0.37054100  | C           | -9.08205700  | 3.73872700  | 2.17816300  |
| C          | -1.85652400 | 8.93892400  | 1.12801400  | C           | -9.99656100  | 4.12237200  | 3.14685000  |
| C          | -2.61867400 | 9.85879000  | 1.93702900  | H           | -10.33342500 | 5.37346400  | 4.87567600  |
| C          | -4.02416800 | 9.73684500  | 1.54917800  | H           | -8.06336300  | 6.36805400  | 4.85983300  |
| C          | -4.12920400 | 8.68801300  | 0.60044000  | H           | -9.32920400  | 3.00345100  | 1.41900000  |
| C          | -5.36921400 | 8.19762900  | -0.08148400 | H           | -10.99199600 | 3.68917200  | 3.16523900  |
| H          | -6.26585600 | 8.41281400  | 0.50535400  | C           | -6.82720200  | 3.90015900  | 1.14962700  |
| H          | -5.48136100 | 8.68350700  | -1.06020900 | N           | -6.15312800  | 5.82899000  | 3.11950400  |
| H          | -5.32590500 | 7.11852700  | -0.25210500 | H           | -5.72862500  | 6.54343000  | 4.23292700  |
| C          | -2.46846000 | 7.02770700  | -0.57055000 | C           | -5.25953500  | 5.44963100  | 2.21843700  |
| H          | -3.08967800 | 6.15478700  | -0.34624000 | O           | -5.57808600  | 4.52459900  | 1.24659900  |
| H          | -2.65516600 | 7.32643900  | -1.61032100 | O           | -6.98951100  | 3.11211500  | 0.25003200  |
| H          | -1.42344400 | 6.72099200  | -0.48458300 | O           | -4.08444300  | 5.87078500  | 2.12977600  |
| C          | -0.37654300 | 8.73257300  | 1.20056600  |             |              |             |             |
| H          | -0.15001900 | 8.01504900  | 2.00123900  | <b>INT6</b> |              |             |             |
| H          | 0.01388400  | 8.33650700  | 0.25909300  | C           | -2.69453500  | 8.30469300  | 0.37287400  |
| H          | 0.14032800  | 9.67191500  | 1.41767800  | C           | -2.06917600  | 9.12694400  | 1.39957500  |
| C          | -2.07532800 | 10.87359400 | 2.89576900  | C           | -3.10418600  | 9.73967500  | 2.16994300  |
| H          | -1.07285600 | 10.60053700 | 3.23434500  | C           | -4.38566600  | 9.31770300  | 1.61480900  |
| H          | -2.02098800 | 11.86583000 | 2.42743000  | C           | -4.12154600  | 8.47060700  | 0.48739000  |
| H          | -2.71517200 | 10.94860900 | 3.77972900  | C           | -5.16013400  | 7.85105600  | -0.39433500 |
| C          | -5.13035000 | 10.57584000 | 2.10961600  | H           | -6.04413400  | 7.57358900  | 0.18385300  |
| H          | -5.04861700 | 11.60728000 | 1.74260900  | H           | -5.45631200  | 8.56542800  | -1.17461400 |
| H          | -6.11292600 | 10.19295300 | 1.82395200  | H           | -4.78276800  | 6.95212200  | -0.88775800 |

|            |              |             |             |    |              |            |             |
|------------|--------------|-------------|-------------|----|--------------|------------|-------------|
| C          | -1.96906000  | 7.52632000  | -0.68253700 | C  | -1.38252300  | 5.40756700 | 0.32071000  |
| H          | -2.55930800  | 6.67270700  | -1.02507700 | C  | -2.41342500  | 4.64927100 | -0.38316400 |
| H          | -1.75686200  | 8.16140200  | -1.55360400 | C  | -2.47723800  | 3.35692100 | 0.20956900  |
| H          | -1.01567500  | 7.14212600  | -0.30936600 | C  | -3.39138500  | 2.23003700 | -0.15759400 |
| C          | -0.59154800  | 9.26511000  | 1.60013700  | H  | -4.15958600  | 2.54858400 | -0.86544800 |
| H          | -0.08496800  | 8.30276800  | 1.48362200  | H  | -2.81244400  | 1.42123300 | -0.62262900 |
| H          | -0.17299800  | 9.95890900  | 0.85903900  | H  | -3.89007000  | 1.83355000 | 0.73169600  |
| H          | -0.35253300  | 9.64856500  | 2.59451200  | C  | -1.24506700  | 2.12762300 | 2.17879800  |
| C          | -2.93665900  | 10.67121300 | 3.33181500  | H  | -2.13175900  | 1.49420300 | 2.26104500  |
| H          | -1.92983200  | 10.61471300 | 3.75235100  | H  | -0.42752500  | 1.53004900 | 1.75038200  |
| H          | -3.11331900  | 11.70829100 | 3.01730900  | H  | -0.96859000  | 2.45528000 | 3.18289100  |
| H          | -3.64517400  | 10.43716000 | 4.13142100  | C  | 0.39083400   | 4.89328800 | 2.17803200  |
| C          | -5.74102700  | 9.73524400  | 2.09356300  | H  | 0.23362600   | 4.53144000 | 3.19519700  |
| H          | -6.18949200  | 10.45995700 | 1.40082300  | H  | 1.28692600   | 4.41634200 | 1.75732600  |
| H          | -6.39297200  | 8.85994000  | 2.16556900  | H  | 0.57569600   | 5.96998100 | 2.21974900  |
| H          | -5.68796400  | 10.20032400 | 3.08106500  | C  | -0.99644000  | 6.81630800 | -0.00633100 |
| Rh         | -3.29405200  | 7.55716300  | 2.32720500  | H  | -0.47836000  | 7.29620300 | 0.82688700  |
| C          | -2.11271600  | 5.72160300  | 5.71263500  | H  | -0.32436300  | 6.82804100 | -0.87538600 |
| H          | -2.58125600  | 4.73275500  | 5.64451400  | H  | -1.87357100  | 7.42027500 | -0.25531000 |
| H          | -2.48291700  | 6.21645700  | 6.61363200  | C  | -3.23607800  | 5.17126700 | -1.52193900 |
| H          | -1.03001000  | 5.58465800  | 5.76565700  | H  | -3.57098800  | 6.19519700 | -1.33157600 |
| C          | -2.48377900  | 6.51112200  | 4.48742000  | H  | -2.65069800  | 5.17425700 | -2.45102900 |
| O          | -3.53912800  | 7.22568000  | 4.46718600  | H  | -4.12510300  | 4.55821400 | -1.68548000 |
| O          | -1.77369000  | 6.45036700  | 3.43160900  | Rh | -2.94436400  | 4.84620600 | 1.75197600  |
| C          | -10.00821300 | 6.28157000  | 3.00699300  | C  | -2.80831500  | 5.54847700 | 6.03985200  |
| C          | -8.72066700  | 6.73031500  | 2.75308600  | H  | -3.79343300  | 5.14302900 | 6.29572900  |
| C          | -7.64250200  | 5.82098800  | 2.68284400  | H  | -2.91276500  | 6.63590800 | 5.97105000  |
| C          | -7.92555500  | 4.44905700  | 2.87937200  | H  | -2.09289100  | 5.28663800 | 6.82176700  |
| C          | -9.23232300  | 4.00446800  | 3.13605300  | C  | -2.35484500  | 4.97199100 | 4.70317000  |
| C          | -10.27616900 | 4.91428600  | 3.20096000  | O  | -3.10839400  | 5.37673600 | 3.71038000  |
| H          | -10.82256700 | 7.00047300  | 3.05819700  | O  | -1.39682200  | 4.20422100 | 4.62364100  |
| H          | -8.51819100  | 7.78739600  | 2.60903700  | C  | -9.39135600  | 4.39483700 | 4.36539800  |
| H          | -9.39363300  | 2.94045800  | 3.27921800  | C  | -8.62105200  | 5.39599800 | 3.78415300  |
| H          | -11.28939300 | 4.57764600  | 3.39942700  | C  | -7.36082200  | 5.10731000 | 3.23518600  |
| C          | -6.82661700  | 3.49183300  | 2.80735200  | C  | -6.88152600  | 3.77340100 | 3.28868300  |
| N          | -6.36874200  | 6.28928700  | 2.42377700  | C  | -7.66943700  | 2.78126900 | 3.88892300  |
| C          | -5.39437400  | 5.41518100  | 2.38352400  | C  | -8.91798100  | 3.07852000 | 4.42258800  |
| O          | -5.57779300  | 4.05745300  | 2.55899400  | H  | -10.36512900 | 4.64220700 | 4.78016800  |
| O          | -6.88731400  | 2.29158500  | 2.94023500  | H  | -8.97174400  | 6.42219300 | 3.74268100  |
| O          | -4.16156800  | 5.66615800  | 2.16266200  | H  | -7.26808600  | 1.77348100 | 3.92090400  |
|            |              |             |             | H  | -9.51774700  | 2.29748300 | 4.88083600  |
| <b>TS4</b> |              |             |             | C  | -5.55668200  | 3.37824200 | 2.73280400  |
| C          | -1.52020000  | 3.31388700  | 1.31277700  | N  | -6.64932700  | 6.18120300 | 2.69721700  |
| C          | -0.79267400  | 4.57063900  | 1.32026400  | C  | -5.55290100  | 6.12713500 | 2.11359400  |

|             |             |             |             |             |              |            |             |
|-------------|-------------|-------------|-------------|-------------|--------------|------------|-------------|
| O           | -5.00375600 | 4.33185200  | 1.98816400  | H           | -10.35771100 | 7.16106900 | 4.33492300  |
| O           | -5.04399600 | 2.27908600  | 2.90126300  | H           | -8.35904000  | 8.02111200 | 3.12916200  |
| O           | -4.62330900 | 6.66865100  | 1.56407500  | H           | -9.04632000  | 3.14217400 | 3.50909200  |
|             |             |             |             | H           | -10.71525200 | 4.69449100 | 4.52493700  |
| <b>INT7</b> |             |             |             | C           | -6.80891100  | 3.62774100 | 2.27863800  |
| C           | -4.55298300 | 0.92845500  | 0.51107500  | N           | -6.52128400  | 6.68873600 | 2.00270900  |
| C           | -3.17135200 | 0.80501800  | 0.96199000  | C           | -5.51916900  | 6.42140600 | 1.37759600  |
| C           | -2.43814400 | 1.91640900  | 0.45175600  | O           | -5.57449000  | 4.02960800 | 2.17513600  |
| C           | -3.35626300 | 2.74926300  | -0.31729800 | O           | -7.22965400  | 2.49565700 | 2.02468400  |
| C           | -4.64285100 | 2.10538700  | -0.30866900 | O           | -4.54423400  | 6.38922500 | 0.71367100  |
| C           | -5.87579700 | 2.58331100  | -1.01036200 |             |              |            |             |
| H           | -5.83384400 | 3.65924500  | -1.19773200 | <b>INT8</b> |              |            |             |
| H           | -5.97239800 | 2.07607000  | -1.98008400 | C           | -4.29109400  | 6.43622200 | 0.99914200  |
| H           | -6.76518800 | 2.37236700  | -0.41315900 | C           | -4.76442100  | 6.39954300 | -0.38091600 |
| C           | -5.66141500 | -0.04390600 | 0.77365400  | C           | -4.11387200  | 5.31569300 | -1.03952500 |
| H           | -6.56952700 | 0.49195500  | 1.05998000  | C           | -3.22176800  | 4.67187300 | -0.08023300 |
| H           | -5.86385100 | -0.64512600 | -0.12331200 | C           | -3.30205700  | 5.40292600 | 1.15336200  |
| H           | -5.40312800 | -0.72939600 | 1.58503600  | C           | -2.49114500  | 5.13399900 | 2.38249500  |
| C           | -2.64779000 | -0.30812500 | 1.81766700  | H           | -1.54538500  | 5.69032400 | 2.32561800  |
| H           | -3.35309300 | -0.55633500 | 2.61583400  | H           | -3.01332000  | 5.45700400 | 3.28707800  |
| H           | -2.49057800 | -1.21163300 | 1.21381500  | H           | -2.26768100  | 4.07111500 | 2.47907300  |
| H           | -1.69596400 | -0.04451800 | 2.28468000  | C           | -4.67800600  | 7.46367200 | 2.01902000  |
| C           | -0.98688300 | 2.22345900  | 0.66330100  | H           | -4.52203100  | 7.09621700 | 3.03629300  |
| H           | -0.54901400 | 1.59143100  | 1.43936900  | H           | -4.07634400  | 8.37475000 | 1.89497000  |
| H           | -0.42337500 | 2.05929000  | -0.26447900 | H           | -5.73084900  | 7.74399500 | 1.92249300  |
| H           | -0.84646000 | 3.26643800  | 0.96304300  | C           | -5.77530700  | 7.34168200 | -0.95956700 |
| C           | -2.97844300 | 3.98335300  | -1.07829000 | H           | -6.60424800  | 7.50364100 | -0.26433200 |
| H           | -2.70771300 | 3.72570700  | -2.11177500 | H           | -5.31332300  | 8.31571900 | -1.16835800 |
| H           | -3.79598400 | 4.70661300  | -1.10496200 | H           | -6.19499100  | 6.95992900 | -1.89315300 |
| H           | -2.12032700 | 4.48255700  | -0.62061400 | C           | -4.29191500  | 4.87891100 | -2.46181200 |
| Rh          | -4.05090100 | 2.66871000  | 1.74545200  | H           | -5.17153300  | 5.33826600 | -2.91904800 |
| C           | -3.15512000 | 3.79957600  | 5.51977400  | H           | -3.41453900  | 5.15983500 | -3.05896000 |
| H           | -3.94889600 | 4.50801500  | 5.78437000  | H           | -4.40928900  | 3.79320100 | -2.52738900 |
| H           | -2.19653400 | 4.31986400  | 5.58675500  | C           | -2.30216200  | 3.52721100 | -0.37072400 |
| H           | -3.18998500 | 2.96593800  | 6.22518600  | H           | -1.30364800  | 3.90184200 | -0.63635800 |
| C           | -3.39252200 | 3.31209700  | 4.11458100  | H           | -2.21553800  | 2.86913400 | 0.49547400  |
| O           | -2.91756200 | 3.94655100  | 3.11853200  | H           | -2.66892800  | 2.93013200 | -1.20998300 |
| O           | -4.10358300 | 2.27768900  | 3.89871100  | Rh          | -5.28931500  | 4.53312700 | 0.64869700  |
| C           | -9.64104300 | 6.46539600  | 3.90664800  | C           | -7.53615200  | 3.51640100 | 0.02538100  |
| C           | -8.52273000 | 6.95390400  | 3.23958200  | C           | -8.85670400  | 2.82335800 | -0.18774700 |
| C           | -7.57496300 | 6.07992300  | 2.68292800  | H           | -9.66568800  | 3.55379300 | -0.26297200 |
| C           | -7.76179900 | 4.68211200  | 2.79714500  | H           | -8.81905700  | 2.19830900 | -1.08330400 |
| C           | -8.91035400 | 4.21692100  | 3.45334500  | H           | -9.05593900  | 2.17377900 | 0.67267100  |
| C           | -9.84115300 | 5.08704700  | 4.01309600  | O           | -7.48337400  | 4.65233900 | 0.59771900  |



|            |             |             |             |             |             |             |             |
|------------|-------------|-------------|-------------|-------------|-------------|-------------|-------------|
| O          | -6.44926000 | 2.95831300  | -0.33268900 | Rh          | -4.89588300 | 3.73781700  | 0.90901700  |
| C          | -6.33935100 | 0.19538000  | 6.09108700  | C           | -6.98368800 | 2.02555300  | -0.39269200 |
| C          | -5.01638000 | 0.05234100  | 5.68985600  | C           | -7.62309800 | 1.26434500  | -1.53591700 |
| C          | -4.50303900 | 0.78423700  | 4.60565800  | H           | -8.70180100 | 1.18591400  | -1.38151600 |
| C          | -5.35008800 | 1.68719800  | 3.91586700  | H           | -7.40269400 | 1.74210400  | -2.49246300 |
| C          | -6.67949700 | 1.81894700  | 4.34720400  | H           | -7.20887300 | 0.24947600  | -1.54818600 |
| C          | -7.18051700 | 1.08508900  | 5.41746500  | O           | -7.46267000 | 1.86407600  | 0.76818200  |
| H          | -6.71203200 | -0.38599700 | 6.93033200  | O           | -5.98838900 | 2.76683900  | -0.66106500 |
| H          | -4.34555100 | -0.62804000 | 6.20451500  | C           | -7.17140400 | 3.92092000  | 4.71560000  |
| H          | -7.31101500 | 2.51977400  | 3.81296500  | C           | -6.35582200 | 3.05995400  | 5.44558900  |
| H          | -8.21550500 | 1.20589300  | 5.72468500  | C           | -5.43182300 | 2.21141800  | 4.80552600  |
| C          | -4.88399600 | 2.48930000  | 2.73177600  | C           | -5.32183500 | 2.27320300  | 3.40190300  |
| N          | -3.15718600 | 0.56316000  | 4.32298600  | C           | -6.14790000 | 3.14754700  | 2.65395400  |
| C          | -2.32715300 | 0.92220300  | 3.50503700  | C           | -7.07361100 | 3.96492700  | 3.32351500  |
| O          | -3.81063900 | 2.21605300  | 2.16903900  | H           | -7.89322600 | 4.54466600  | 5.23705200  |
| O          | -5.68453700 | 3.44652800  | 2.38102900  | H           | -6.42375800 | 3.01135500  | 6.52796600  |
| O          | -1.34064400 | 1.11023600  | 2.88836300  | H           | -6.71463500 | 2.58957400  | 1.61613900  |
|            |             |             |             | H           | -7.74399800 | 4.60207300  | 2.75164400  |
| <b>TSS</b> |             |             |             | C           | -4.33535600 | 1.45719100  | 2.61632800  |
| C          | -3.57121900 | 5.24249900  | 1.80867000  | N           | -4.67379000 | 1.39916000  | 5.63825600  |
| C          | -4.72941700 | 5.95590100  | 1.29659500  | C           | -3.86931900 | 0.48260700  | 5.52589900  |
| C          | -4.80241800 | 5.72851700  | -0.10704800 | O           | -3.76704800 | 0.47568400  | 3.09391800  |
| C          | -3.64660600 | 4.92604800  | -0.49717800 | O           | -4.12671800 | 1.87643400  | 1.39147800  |
| C          | -2.87171400 | 4.67346600  | 0.67549200  | O           | -3.10219300 | -0.38159300 | 5.72815600  |
| C          | -1.61258000 | 3.86368500  | 0.76312500  |             |             |             |             |
| H          | -1.14118300 | 3.75250500  | -0.21656100 | <b>INT9</b> |             |             |             |
| H          | -0.89161800 | 4.34239200  | 1.43446000  | C           | -3.27432800 | 5.34634000  | 1.64621300  |
| H          | -1.82944300 | 2.85999800  | 1.14885300  | C           | -4.48524300 | 6.09552100  | 1.36979700  |
| C          | -3.06298300 | 5.27708700  | 3.21998800  | C           | -4.82301900 | 5.86018200  | 0.00852700  |
| H          | -2.47963700 | 4.38199500  | 3.45326600  | C           | -3.72135700 | 5.11278300  | -0.61877300 |
| H          | -2.41525500 | 6.15025800  | 3.38031800  | C           | -2.76805600 | 4.82644600  | 0.36705900  |
| H          | -3.88389000 | 5.33377100  | 3.94003000  | C           | -1.51035500 | 4.02132600  | 0.24001100  |
| C          | -5.62970800 | 6.84082900  | 2.10407800  | H           | -1.32750600 | 3.71716100  | -0.79377200 |
| H          | -5.74532600 | 6.47532100  | 3.12667700  | H           | -0.64185500 | 4.59794500  | 0.58189300  |
| H          | -5.20330200 | 7.85218300  | 2.15537700  | H           | -1.57691000 | 3.11352800  | 0.85184000  |
| H          | -6.62498000 | 6.92478900  | 1.65938600  | C           | -2.49528000 | 5.35380700  | 2.92825900  |
| C          | -5.82459300 | 6.25865900  | -1.06714000 | H           | -1.98545000 | 4.39841800  | 3.08180900  |
| H          | -6.71113400 | 6.63399100  | -0.54932900 | H           | -1.73221600 | 6.14482200  | 2.91668700  |
| H          | -5.40778700 | 7.08456000  | -1.65904400 | H           | -3.14585900 | 5.52771900  | 3.78958000  |
| H          | -6.14543500 | 5.47746200  | -1.76312600 | C           | -5.19717100 | 6.98965000  | 2.33926000  |
| C          | -3.34416700 | 4.49951200  | -1.90170300 | H           | -5.21390100 | 6.56576400  | 3.34647400  |
| H          | -3.02369200 | 5.35740400  | -2.50806700 | H           | -4.68839600 | 7.96191500  | 2.39217500  |
| H          | -2.55239300 | 3.74733700  | -1.93103500 | H           | -6.23117700 | 7.17640300  | 2.03722500  |
| H          | -4.23100000 | 4.06474100  | -2.37328600 | C           | -5.99266500 | 6.42330100  | -0.74414600 |

|    |             |             |             |    |             |             |             |
|----|-------------|-------------|-------------|----|-------------|-------------|-------------|
| H  | -6.81557400 | 6.68656600  | -0.07373500 | H  | -1.61423500 | 6.78111100  | 2.60360200  |
| H  | -5.70446100 | 7.33181700  | -1.29138900 | H  | -2.84466900 | 6.09593000  | 3.68065400  |
| H  | -6.37501500 | 5.70641200  | -1.47753300 | C  | -5.11692600 | 7.22146900  | 2.22631200  |
| C  | -3.71146300 | 4.70526100  | -2.06216400 | H  | -5.02721000 | 6.95085300  | 3.28195100  |
| H  | -3.70574700 | 5.58447200  | -2.71955500 | H  | -4.67949900 | 8.22100800  | 2.09839400  |
| H  | -2.83480300 | 4.09922800  | -2.30370200 | H  | -6.18152600 | 7.29774200  | 1.98974200  |
| H  | -4.60201100 | 4.11450300  | -2.30637400 | C  | -6.12401900 | 6.08122600  | -0.63440400 |
| Rh | -4.74759600 | 3.88657600  | 1.10636300  | H  | -6.90223900 | 6.39644500  | 0.06525800  |
| C  | -6.70990500 | 1.65751200  | -0.12739300 | H  | -5.97205500 | 6.89507200  | -1.35716000 |
| C  | -7.17910700 | 0.78137200  | -1.25618900 | H  | -6.50346500 | 5.21769800  | -1.18941200 |
| H  | -8.24652200 | 0.56697400  | -1.15294900 | C  | -3.79419000 | 4.38631000  | -1.90432400 |
| H  | -6.97411900 | 1.26239400  | -2.21282000 | H  | -3.77654000 | 5.16183600  | -2.68210200 |
| H  | -6.64354600 | -0.17366900 | -1.20743200 | H  | -2.95603400 | 3.70925900  | -2.08373900 |
| O  | -7.12826000 | 1.25025300  | 1.05871600  | H  | -4.71876100 | 3.81438300  | -2.03916800 |
| O  | -6.00087100 | 2.64933500  | -0.30873800 | Rh | -4.47884400 | 4.02245400  | 1.44800300  |
| C  | -7.64888900 | 3.84805200  | 4.38173900  | C  | -7.57245600 | 3.88123000  | 4.52392100  |
| C  | -7.16323900 | 2.79772200  | 5.15443600  | C  | -7.31219500 | 2.63800100  | 5.08961300  |
| C  | -6.03564700 | 2.06822300  | 4.74081900  | C  | -6.25068700 | 1.84394700  | 4.61860300  |
| C  | -5.40041500 | 2.42959700  | 3.52829700  | C  | -5.45099600 | 2.33921800  | 3.56727800  |
| C  | -5.88149200 | 3.51397700  | 2.76076500  | C  | -5.71391800 | 3.60365500  | 3.00058300  |
| C  | -7.01710800 | 4.21245300  | 3.18577000  | C  | -6.77596800 | 4.37327000  | 3.48220800  |
| H  | -8.53134800 | 4.39020300  | 4.71409000  | H  | -8.40309400 | 4.47474000  | 4.89902600  |
| H  | -7.64666000 | 2.51349200  | 6.08345900  | H  | -7.91982700 | 2.25254900  | 5.90202300  |
| H  | -6.76247000 | 1.84318800  | 1.75839100  | H  | -7.00209200 | 5.34560300  | 3.05465500  |
| H  | -7.41509900 | 5.03542700  | 2.59806000  | C  | -4.31628400 | 1.58603900  | 2.95334300  |
| C  | -4.22927100 | 1.69816400  | 2.94713100  | N  | -6.07962100 | 0.61518800  | 5.24228200  |
| N  | -5.63474700 | 1.03013700  | 5.56951300  | C  | -5.34024800 | -0.35567500 | 5.18522200  |
| C  | -4.75331000 | 0.18046900  | 5.60569500  | O  | -3.94411500 | 0.47938000  | 3.32697900  |
| O  | -3.67505200 | 0.75441500  | 3.51066000  | O  | -3.73953500 | 2.21921100  | 1.94169300  |
| O  | -3.86683800 | 2.13715400  | 1.76370100  | O  | -4.79950700 | -1.38490300 | 5.34995700  |
| O  | -4.05468100 | -0.71095600 | 5.91412900  |    |             |             |             |

**INT11**

**INT10**

|   |             |            |             |   |             |            |             |
|---|-------------|------------|-------------|---|-------------|------------|-------------|
| C | -3.11553600 | 5.63991400 | 1.59301800  | C | -5.33317400 | 3.76204900 | 0.60020800  |
| C | -4.42000700 | 6.23679000 | 1.33621300  | C | -6.65021200 | 4.31195200 | 0.64153900  |
| C | -4.84149900 | 5.75868900 | 0.07176100  | C | -7.58591500 | 3.30109800 | 0.15495200  |
| C | -3.72793000 | 5.00475200 | -0.54081400 | C | -6.85839600 | 2.12041000 | -0.09191700 |
| C | -2.66551600 | 4.96670600 | 0.36741800  | C | -5.45740200 | 2.37146300 | 0.24564900  |
| C | -1.34560300 | 4.26819200 | 0.23066100  | C | -4.33556300 | 1.40510400 | 0.00389800  |
| H | -1.24749200 | 3.78085700 | -0.74232600 | H | -4.62995600 | 0.38651300 | 0.27252600  |
| H | -0.51473900 | 4.97682100 | 0.33740500  | H | -4.04570600 | 1.40125300 | -1.05617100 |
| H | -1.23254700 | 3.49554400 | 0.99956600  | H | -3.45114300 | 1.66278700 | 0.59248500  |
| C | -2.24869700 | 5.90142800 | 2.78547700  | C | -4.04810800 | 4.51179400 | 0.78156300  |
| H | -1.59088900 | 5.05245500 | 2.99091700  | H | -3.27776000 | 3.89527300 | 1.25059000  |
|   |             |            |             | H | -3.66858000 | 4.83762800 | -0.19690800 |

|    |              |             |             |            |              |             |             |
|----|--------------|-------------|-------------|------------|--------------|-------------|-------------|
| H  | -4.18092300  | 5.40698000  | 1.39518100  | C          | -9.68505900  | 0.62750600  | 2.76910700  |
| C  | -7.00208700  | 5.74694700  | 0.90481600  | C          | -12.07626600 | 2.08444700  | 2.88590200  |
| H  | -6.31286000  | 6.21052600  | 1.61632100  | H          | -10.84086600 | 3.77817100  | 3.39005800  |
| H  | -6.96537300  | 6.33282200  | -0.02441600 | C          | -10.90529400 | 0.00191600  | 2.51763100  |
| H  | -8.01453100  | 5.84182000  | 1.30810700  | H          | -8.75013500  | 0.07977800  | 2.72977400  |
| C  | -9.04964000  | 3.53153600  | -0.07890200 | C          | -12.10098400 | 0.72278800  | 2.57285400  |
| H  | -9.49153100  | 4.15298800  | 0.70554800  | H          | -13.00205000 | 2.65147600  | 2.93480800  |
| H  | -9.21154900  | 4.04725500  | -1.03549700 | H          | -10.92028100 | -1.05875200 | 2.28199400  |
| H  | -9.60865200  | 2.59332200  | -0.10382500 | H          | -13.04762300 | 0.22651500  | 2.37669100  |
| C  | -7.37831400  | 0.79777500  | -0.56752900 |            |              |             |             |
| H  | -6.96833200  | 0.55236500  | -1.55590100 | <b>TS6</b> |              |             |             |
| H  | -7.08737900  | 0.00071400  | 0.12573200  | C          | -5.09808000  | 3.41093100  | 0.22406000  |
| H  | -8.46837200  | 0.79544300  | -0.64434000 | C          | -6.32426700  | 4.17770000  | 0.38074200  |
| Rh | -6.52218700  | 2.57973700  | 2.16369500  | C          | -7.43429200  | 3.33686600  | 0.00118800  |
| C  | -3.12106800  | 3.23133900  | 4.83186500  | C          | -6.92142700  | 2.02945000  | -0.23595800 |
| C  | -2.88771900  | 1.94199500  | 5.29860300  | C          | -5.45911100  | 2.08840800  | -0.11550300 |
| C  | -3.71425000  | 0.88117500  | 4.89449200  | C          | -4.55450300  | 0.91657500  | -0.35377400 |
| C  | -4.77412600  | 1.14653300  | 3.99540300  | H          | -4.88251200  | 0.04838600  | 0.22756000  |
| C  | -4.99403700  | 2.45153000  | 3.52305300  | H          | -4.55897100  | 0.63091600  | -1.41416900 |
| C  | -4.17698600  | 3.49757300  | 3.95106200  | H          | -3.52216900  | 1.13745400  | -0.07072000 |
| H  | -2.47876500  | 4.04429400  | 5.16321000  | C          | -3.71388500  | 3.96177200  | 0.39687300  |
| H  | -2.07360000  | 1.72951900  | 5.98392900  | H          | -2.96690800  | 3.16545500  | 0.44351000  |
| H  | -4.35669000  | 4.51779500  | 3.62703000  | H          | -3.45061300  | 4.61907900  | -0.44283700 |
| C  | -5.71210400  | 0.10803600  | 3.49189300  | H          | -3.62316900  | 4.54791700  | 1.31719500  |
| N  | -3.41558400  | -0.36941300 | 5.42026000  | C          | -6.38756400  | 5.65549600  | 0.63907200  |
| C  | -3.83169200  | -1.51747300 | 5.35832300  | H          | -5.57519300  | 5.98287200  | 1.29464900  |
| O  | -5.66535900  | -1.08057100 | 3.80669400  | H          | -6.29740200  | 6.21982700  | -0.29996800 |
| O  | -6.62102200  | 0.57301600  | 2.65889400  | H          | -7.33361400  | 5.94596100  | 1.10546900  |
| O  | -3.99838400  | -2.67230200 | 5.49474000  | C          | -8.86578900  | 3.76982400  | -0.11747200 |
| C  | -7.70127000  | 3.53700100  | 3.95426800  | H          | -9.10107800  | 4.58068800  | 0.57826800  |
| C  | -8.42630300  | 2.70097000  | 3.38002200  | H          | -9.07489800  | 4.13446400  | -1.13245900 |
| C  | -7.25694200  | 4.51751500  | 4.91014400  | H          | -9.55528700  | 2.94811400  | 0.09185400  |
| C  | -6.57377300  | 4.12939600  | 6.07845800  | C          | -7.68516200  | 0.81640800  | -0.67759400 |
| C  | -7.55136800  | 5.88050700  | 4.71089900  | H          | -7.61144200  | 0.68325900  | -1.76603600 |
| C  | -6.20702400  | 5.08390400  | 7.02445900  | H          | -7.29048800  | -0.08689200 | -0.20295200 |
| H  | -6.33788100  | 3.08219000  | 6.23192500  | H          | -8.74507900  | 0.89106800  | -0.42004600 |
| C  | -7.17663400  | 6.82872600  | 5.66047100  | Rh         | -6.46000900  | 2.50766500  | 1.89683900  |
| H  | -8.08379600  | 6.18423300  | 3.81493500  | C          | -3.30594500  | 3.82662700  | 4.63465500  |
| C  | -6.50398400  | 6.43373900  | 6.81968300  | C          | -2.89904400  | 2.59617200  | 5.14208700  |
| H  | -5.68490600  | 4.77097100  | 7.92426200  | C          | -3.66100600  | 1.43579200  | 4.91104100  |
| H  | -7.41496000  | 7.87638400  | 5.49766300  | C          | -4.83857400  | 1.53109900  | 4.13484900  |
| H  | -6.21458700  | 7.17404100  | 7.56048200  | C          | -5.26282900  | 2.79171800  | 3.66035000  |
| C  | -9.65436300  | 1.99851400  | 3.08421900  | C          | -4.49522100  | 3.93677000  | 3.91284000  |
| C  | -10.86394200 | 2.72154800  | 3.13941500  | H          | -2.70235300  | 4.71107400  | 4.82276500  |

|              |              |             |             |    |              |             |             |
|--------------|--------------|-------------|-------------|----|--------------|-------------|-------------|
| H            | -1.98900300  | 2.50237100  | 5.72554800  | H  | -3.50694900  | -0.14022400 | 1.60213100  |
| H            | -4.84151000  | 4.91176700  | 3.58112000  | H  | -3.84888100  | -1.49126300 | 0.51777800  |
| C            | -5.61282600  | 0.33001500  | 3.68380100  | H  | -3.19418500  | 0.01909200  | -0.13462900 |
| N            | -3.15837600  | 0.26048100  | 5.45202700  | C  | -4.65469200  | 2.66554800  | 0.67261900  |
| C            | -3.50152700  | -0.91264400 | 5.54764300  | H  | -3.77040200  | 2.37257900  | 1.24284800  |
| O            | -5.50778100  | -0.76719800 | 4.23693100  | H  | -4.31955500  | 2.95655700  | -0.33408600 |
| O            | -6.37314200  | 0.53877400  | 2.64215900  | H  | -5.08578400  | 3.54741400  | 1.15211600  |
| O            | -3.54793100  | -2.05640000 | 5.80638900  | C  | -7.78531000  | 2.97837200  | 0.08334900  |
| C            | -7.19531700  | 3.19080900  | 4.00722200  | H  | -7.41561900  | 3.73766600  | 0.77782200  |
| C            | -8.02714200  | 2.59241300  | 3.22675400  | H  | -7.65820000  | 3.36598700  | -0.93688600 |
| C            | -7.21318600  | 4.10262400  | 5.15483400  | H  | -8.85773400  | 2.85827700  | 0.25994400  |
| C            | -6.61033100  | 3.75640600  | 6.37667400  | C  | -8.96525700  | -0.01537500 | -0.28832700 |
| C            | -7.91306900  | 5.31826900  | 5.06073900  | H  | -9.02402900  | -0.23912500 | -1.36264900 |
| C            | -6.72595300  | 4.59762900  | 7.48003100  | H  | -9.30201000  | -0.90554300 | 0.25223800  |
| H            | -6.06200800  | 2.82318300  | 6.45283700  | H  | -9.67418800  | 0.78797000  | -0.07545300 |
| C            | -8.01529000  | 6.16436800  | 6.16559100  | Rh | -6.73638200  | 0.61898300  | 2.17494900  |
| H            | -8.36816300  | 5.59539400  | 4.11411100  | C  | -4.91181000  | 5.48050000  | 3.63617100  |
| C            | -7.42500300  | 5.80458400  | 7.37800800  | C  | -3.71284600  | 4.77970000  | 3.73017300  |
| H            | -6.26864100  | 4.31155700  | 8.42313700  | C  | -3.71843200  | 3.40737900  | 4.01039500  |
| H            | -8.55755800  | 7.10206100  | 6.07831400  | C  | -4.94036700  | 2.70522800  | 4.14018100  |
| H            | -7.50780200  | 6.46051900  | 8.24033300  | C  | -6.14945200  | 3.42682700  | 4.04111000  |
| C            | -9.39667700  | 2.13127700  | 3.07169500  | C  | -6.12115100  | 4.81102400  | 3.80813500  |
| C            | -10.48378300 | 2.99529100  | 3.30004900  | H  | -4.90092600  | 6.54917700  | 3.43992300  |
| C            | -9.64807700  | 0.79936800  | 2.68869700  | H  | -2.75659000  | 5.27909200  | 3.61284900  |
| C            | -11.79198400 | 2.53707900  | 3.14565200  | H  | -7.05978200  | 5.35644700  | 3.76899000  |
| H            | -10.29741000 | 4.02083000  | 3.60391900  | C  | -4.88849400  | 1.23421600  | 4.52375100  |
| C            | -10.95899400 | 0.34907500  | 2.54436500  | N  | -2.46912600  | 2.78887200  | 4.09417000  |
| H            | -8.80341300  | 0.13567600  | 2.53294800  | C  | -1.95006900  | 1.81341100  | 4.60372100  |
| C            | -12.03388800 | 1.21495100  | 2.76638800  | O  | -4.25111500  | 0.92992700  | 5.53064500  |
| H            | -12.62297900 | 3.21420400  | 3.32517600  | O  | -5.45840400  | 0.34366900  | 3.75907400  |
| H            | -11.14203600 | -0.68404300 | 2.26116400  | O  | -1.25294300  | 0.95060300  | 4.99174500  |
| H            | -13.05423700 | 0.86008300  | 2.64864500  | C  | -7.46990500  | 2.75097600  | 4.24349000  |
|              |              |             |             | C  | -7.80224500  | 1.68542300  | 3.49947100  |
|              |              |             |             | C  | -8.33031200  | 3.28643800  | 5.34299600  |
| <b>INT12</b> |              |             |             | C  | -7.76180800  | 3.56490700  | 6.59964500  |
| C            | -5.27303700  | 0.12474400  | 0.40840000  | C  | -9.70188500  | 3.52845100  | 5.16635900  |
| C            | -5.64136800  | 1.54439700  | 0.56777100  | C  | -8.54527400  | 4.04499000  | 7.64740200  |
| C            | -7.04937900  | 1.68139300  | 0.24678400  | C  | -6.70155500  | 3.38659000  | 6.75500200  |
| C            | -7.56472000  | 0.36637500  | 0.08846800  | H  | -10.48555000 | 4.01336200  | 6.21465700  |
| C            | -6.44016900  | -0.58763700 | 0.13563800  | C  | -10.15256000 | 3.35150900  | 4.19532100  |
| C            | -6.59563200  | -2.06606900 | -0.06092300 | H  | -9.91140100  | 4.27160400  | 7.46000700  |
| H            | -7.42096900  | -2.46648200 | 0.53808900  | C  | -8.08728800  | 4.24176500  | 8.61327000  |
| H            | -6.81908400  | -2.29569500 | -1.11194000 | H  | -11.54471700 | 4.19784600  | 6.05335700  |
| H            | -5.68899100  | -2.60958700 | 0.21543200  | H  | -10.52063900 | 4.65116100  | 8.27601000  |
| C            | -3.88409200  | -0.40267700 | 0.60736500  | H  |              |             |             |

|            |              |             |             |              |              |             |             |
|------------|--------------|-------------|-------------|--------------|--------------|-------------|-------------|
| C          | -8.84802100  | 0.66273100  | 3.62827100  | C            | -4.94365600  | 4.12139100  | 4.87995500  |
| C          | -10.11797400 | 0.75868500  | 3.00849000  | H            | -3.33519900  | 5.26752900  | 5.71992000  |
| C          | -8.51791700  | -0.54588300 | 4.29322000  | H            | -1.67999400  | 3.40332800  | 5.54342600  |
| C          | -11.02295000 | -0.29178800 | 3.07623000  | H            | -5.65910200  | 4.92928800  | 4.98008900  |
| H          | -10.38185200 | 1.67344800  | 2.48535200  | C            | -4.76501200  | 0.60215200  | 3.45493300  |
| C          | -9.43240500  | -1.60425400 | 4.33995000  | N            | -2.06691200  | 1.09681100  | 4.58766400  |
| H          | -7.55487300  | -0.62635300 | 4.78750900  | C            | -1.91697900  | -0.09184100 | 4.35388700  |
| C          | -10.68203200 | -1.48207400 | 3.73744400  | O            | -4.21036600  | -0.47530600 | 3.66319500  |
| H          | -12.00264100 | -0.19012000 | 2.61617000  | O            | -5.71868800  | 0.71312900  | 2.54661100  |
| H          | -9.16507900  | -2.51701000 | 4.86545900  | O            | -1.49412000  | -1.17611200 | 4.19545300  |
| H          | -11.39573500 | -2.29997600 | 3.78545300  | C            | -6.80600100  | 2.72714000  | 4.00920500  |
|            |              |             |             | C            | -7.40847200  | 1.73680700  | 3.19516500  |
| <b>TS7</b> |              |             |             | C            | -7.79871200  | 3.52084600  | 4.81415000  |
| C          | -5.25794800  | 3.09680500  | -0.15675600 | C            | -7.68049100  | 3.60957000  | 6.21493100  |
| C          | -5.65954300  | 4.32947100  | 0.37999300  | C            | -8.91408600  | 4.11664300  | 4.20531600  |
| C          | -7.11648900  | 4.30815400  | 0.44996100  | C            | -8.64401100  | 4.27231300  | 6.97207100  |
| C          | -7.59698000  | 3.12567700  | -0.23708900 | H            | -6.82829100  | 3.15240000  | 6.70861500  |
| C          | -6.46023000  | 2.33303500  | -0.53470800 | C            | -9.87981900  | 4.78077200  | 4.96400400  |
| C          | -6.42844400  | 1.01077500  | -1.24308900 | H            | -9.01581600  | 4.05500100  | 3.12707400  |
| H          | -7.39829600  | 0.50669500  | -1.20191600 | C            | -9.74854800  | 4.86248600  | 6.35012500  |
| H          | -6.16445900  | 1.13739100  | -2.30280700 | H            | -8.53449800  | 4.32431900  | 8.05216400  |
| H          | -5.68875100  | 0.33824900  | -0.79796000 | H            | -10.73295800 | 5.23703900  | 4.46863300  |
| C          | -3.85764200  | 2.60129100  | -0.37436700 | H            | -10.49757200 | 5.38086600  | 6.94251400  |
| H          | -3.74385300  | 1.56709300  | -0.03234300 | C            | -8.46356700  | 0.77094300  | 3.40404700  |
| H          | -3.59738900  | 2.62311900  | -1.44151200 | C            | -9.12642600  | 0.20255900  | 2.29868300  |
| H          | -3.12412700  | 3.21063000  | 0.16023900  | C            | -8.79807000  | 0.32754900  | 4.70143000  |
| C          | -4.79296900  | 5.45491500  | 0.86476500  | C            | -10.10588000 | -0.76738300 | 2.48312500  |
| H          | -3.74458900  | 5.15248800  | 0.93433600  | H            | -8.84475500  | 0.52816900  | 1.30323700  |
| H          | -4.84467100  | 6.31630100  | 0.18406800  | C            | -9.78232200  | -0.63782900 | 4.88263000  |
| H          | -5.09805600  | 5.80439500  | 1.85754000  | H            | -8.28253500  | 0.75078300  | 5.55695200  |
| C          | -7.95301100  | 5.48846400  | 0.85318100  | C            | -10.43810800 | -1.18603600 | 3.77540000  |
| H          | -7.56608300  | 5.96645600  | 1.75840400  | H            | -10.60900000 | -1.20213800 | 1.62402200  |
| H          | -7.95493100  | 6.24594900  | 0.05643000  | H            | -10.03483700 | -0.97137000 | 5.88509300  |
| H          | -8.99367400  | 5.20741400  | 1.03816300  | H            | -11.20272700 | -1.94462600 | 3.91982900  |
| C          | -9.02682600  | 2.84215200  | -0.59646300 |              |              |             |             |
| H          | -9.32084100  | 3.39978000  | -1.49706000 | <b>INT13</b> |              |             |             |
| H          | -9.18848200  | 1.78098300  | -0.80686200 | C            | -5.34222300  | 3.27437800  | -0.19988200 |
| H          | -9.71647900  | 3.13073000  | 0.20317000  | C            | -5.79540700  | 4.43654300  | 0.44677700  |
| Rh         | -6.50064800  | 2.60704800  | 1.73537100  | C            | -7.23698500  | 4.28984400  | 0.59756700  |
| C          | -3.63209700  | 4.30886900  | 5.30265800  | C            | -7.67034300  | 3.11991800  | -0.16573300 |
| C          | -2.70329300  | 3.28027500  | 5.20617400  | C            | -6.50595100  | 2.46254100  | -0.60009500 |
| C          | -3.07980300  | 2.04596500  | 4.65420400  | C            | -6.41251800  | 1.20197500  | -1.40996200 |
| C          | -4.39741900  | 1.85339200  | 4.17211700  | H            | -7.35213200  | 0.64205500  | -1.39722000 |
| C          | -5.36088700  | 2.89193500  | 4.32755700  | H            | -6.17323000  | 1.42205500  | -2.46035200 |

|    |             |             |             |              |              |             |            |
|----|-------------|-------------|-------------|--------------|--------------|-------------|------------|
| H  | -5.62747800 | 0.53676600  | -1.03422900 | H            | -10.78683600 | 4.79401300  | 4.09410200 |
| C  | -3.92273300 | 2.92290000  | -0.54042500 | H            | -10.53620800 | 5.40975300  | 6.49616300 |
| H  | -3.72201700 | 1.85724100  | -0.38597400 | C            | -8.28995100  | 0.65153000  | 3.49426200 |
| H  | -3.70813600 | 3.14123900  | -1.59611400 | C            | -8.85967600  | -0.03026800 | 2.40816600 |
| H  | -3.20969100 | 3.48786600  | 0.06646100  | C            | -8.87273200  | 0.50786500  | 4.76221500 |
| C  | -4.98713700 | 5.61068000  | 0.91659800  | C            | -9.98652100  | -0.83117400 | 2.58222600 |
| H  | -3.93327700 | 5.34894700  | 1.05114300  | H            | -8.40568000  | 0.07556500  | 1.42722600 |
| H  | -5.02999800 | 6.43860200  | 0.19359700  | C            | -10.00674600 | -0.28687600 | 4.93474700 |
| H  | -5.35364000 | 5.99692400  | 1.87346100  | H            | -8.44081700  | 1.02283700  | 5.61395700 |
| C  | -8.13722100 | 5.39277600  | 1.07395700  | C            | -10.56721800 | -0.95798100 | 3.84693400 |
| H  | -7.79805300 | 5.81813400  | 2.02299000  | H            | -10.41416500 | -1.35440400 | 1.73095100 |
| H  | -8.15178200 | 6.20466000  | 0.33258600  | H            | -10.44821200 | -0.38481700 | 5.92297100 |
| H  | -9.16764100 | 5.05450100  | 1.20748200  | H            | -11.44959900 | -1.57763800 | 3.98308300 |
| C  | -9.09633600 | 2.73744100  | -0.43540700 |              |              |             |            |
| H  | -9.52710900 | 3.35279500  | -1.23833400 | <b>INT14</b> |              |             |            |
| H  | -9.18016300 | 1.69158800  | -0.74444000 | C            | -3.33119700  | -2.78914300 | 5.75729900 |
| H  | -9.72835400 | 2.86738700  | 0.44924500  | C            | -2.13716800  | -2.08376000 | 5.85520400 |
| Rh | -6.41662000 | 2.59387300  | 1.72741000  | C            | -1.31358400  | -2.41186400 | 4.67407600 |
| C  | -3.41918000 | 4.12852000  | 5.35480700  | C            | -1.97797600  | -3.42835900 | 3.92650400 |
| C  | -2.55646500 | 3.03526200  | 5.33903200  | C            | -3.30186100  | -3.54613300 | 4.49172600 |
| C  | -2.99176400 | 1.80923500  | 4.82176200  | C            | -4.35035100  | -4.54089400 | 4.08072000 |
| C  | -4.31858500 | 1.68952800  | 4.32334800  | H            | -4.27227500  | -4.78723100 | 3.01795600 |
| C  | -5.21352700 | 2.79799000  | 4.38887300  | H            | -4.24918700  | -5.47667600 | 4.64923400 |
| C  | -4.72529100 | 4.01899600  | 4.89412900  | H            | -5.35869500  | -4.15335800 | 4.25679600 |
| H  | -3.06624400 | 5.08160400  | 5.74013500  | C            | -4.49159000  | -2.78720200 | 6.70750500 |
| H  | -1.54012700 | 3.10787400  | 5.70911900  | H            | -5.44117100  | -2.64307800 | 6.18030000 |
| H  | -5.38214900 | 4.88028100  | 4.92392200  | H            | -4.56368000  | -3.74372600 | 7.24462800 |
| C  | -4.74891900 | 0.48272100  | 3.61968000  | H            | -4.40281400  | -1.99460000 | 7.45603100 |
| N  | -2.04996200 | 0.79355200  | 4.82984300  | C            | -1.70592700  | -1.13152200 | 6.93177500 |
| C  | -1.89129200 | -0.38114500 | 4.55822100  | H            | -2.53345500  | -0.86819800 | 7.59688900 |
| O  | -4.13989200 | -0.55804300 | 3.50203800  | H            | -0.90825500  | -1.56712500 | 7.55023800 |
| O  | -5.94555200 | 0.57825400  | 2.90957000  | H            | -1.31091000  | -0.20088900 | 6.50894600 |
| O  | -1.51303100 | -1.47921400 | 4.38672900  | C            | 0.08824000   | -1.91510100 | 4.46663600 |
| C  | -6.61565800 | 2.66260800  | 3.94721000  | H            | 0.16545000   | -0.84169800 | 4.66889300 |
| C  | -7.04260800 | 1.44488000  | 3.29476000  | H            | 0.79251600   | -2.42757600 | 5.13807000 |
| C  | -7.67438700 | 3.48355800  | 4.63090000  | H            | 0.42411100   | -2.08274300 | 3.43964800 |
| C  | -7.56407400 | 3.81850500  | 5.99481100  | C            | -1.42995200  | -4.21148100 | 2.76819300 |
| C  | -8.86168300 | 3.84614300  | 3.97369500  | H            | -1.03081800  | -5.17872100 | 3.10560100 |
| C  | -8.58018100 | 4.50709600  | 6.65774000  | H            | -2.19678100  | -4.41057900 | 2.01415900 |
| H  | -6.67821400 | 3.52624100  | 6.54925400  | H            | -0.61912700  | -3.67361800 | 2.26889200 |
| C  | -9.88192400 | 4.52889300  | 4.63514600  | Rh           | -3.11717400  | -1.53909000 | 3.67862800 |
| H  | -8.98433000 | 3.57306600  | 2.93250200  | C            | -7.53034600  | 1.43299500  | 2.08428400 |
| C  | -9.74503500 | 4.87189000  | 5.98092100  | C            | -6.87594900  | 0.22212700  | 2.28605000 |
| H  | -8.46133200 | 4.74975900  | 7.71069200  | C            | -5.48075200  | 0.17106100  | 2.43112400 |

|              |             |             |             |    |             |             |             |
|--------------|-------------|-------------|-------------|----|-------------|-------------|-------------|
| C            | -4.76145000 | 1.40887300  | 2.46732300  | H  | -4.09920600 | -4.96984800 | 3.09316300  |
| C            | -5.43915200 | 2.64671000  | 2.24026200  | H  | -3.87995800 | -5.64906900 | 4.71239700  |
| C            | -6.82708400 | 2.63378000  | 2.03520400  | H  | -5.17720600 | -4.47866400 | 4.40600800  |
| H            | -8.60758500 | 1.44014900  | 1.93864400  | C  | -4.28011600 | -3.05032400 | 6.83589200  |
| H            | -7.41650200 | -0.71825800 | 2.28613000  | H  | -5.27373600 | -2.96999300 | 6.38293800  |
| H            | -7.35045800 | 3.56179500  | 1.84280000  | H  | -4.22108000 | -4.03480100 | 7.32163300  |
| C            | -3.36069600 | 1.45342900  | 2.82344400  | H  | -4.19913600 | -2.29008200 | 7.61814700  |
| N            | -4.90241000 | -1.08728800 | 2.52401000  | C  | -1.64854200 | -1.13941900 | 6.92302900  |
| O            | -2.64221200 | 0.54134700  | 3.25137400  | H  | -2.43104600 | -1.00086100 | 7.67456500  |
| O            | -2.72220100 | 2.65578100  | 2.74666600  | H  | -0.75341100 | -1.51139200 | 7.44163400  |
| C            | -4.67427500 | 3.89134900  | 2.19615500  | H  | -1.39739900 | -0.15161700 | 6.52011700  |
| C            | -3.33469300 | 3.84827100  | 2.43378400  | C  | -0.02728800 | -1.61715200 | 4.27240300  |
| C            | -5.36490900 | 5.16300600  | 1.81960000  | H  | -0.07726600 | -0.53752600 | 4.44904900  |
| C            | -6.23529800 | 5.80202400  | 2.71752000  | H  | 0.77132200  | -2.01958400 | 4.91160900  |
| C            | -5.17247800 | 5.72676100  | 0.55017600  | H  | 0.26850500  | -1.76970300 | 3.23112200  |
| C            | -6.88618700 | 6.98328700  | 2.35806800  | C  | -1.44476700 | -4.01089400 | 2.60117900  |
| H            | -6.39568300 | 5.37122200  | 3.70253800  | H  | -1.02211500 | -4.99766200 | 2.83686900  |
| C            | -5.82334000 | 6.90790700  | 0.19087100  | H  | -2.23889500 | -4.15068600 | 1.86190100  |
| H            | -4.50577700 | 5.23625200  | -0.15323300 | H  | -0.65890400 | -3.41966400 | 2.12283200  |
| C            | -6.68053400 | 7.54001500  | 1.09359600  | Rh | -3.27193700 | -1.54863300 | 3.76124900  |
| H            | -7.55248100 | 7.46850400  | 3.06636100  | C  | -7.64447100 | 1.55286700  | 2.00527800  |
| H            | -5.66104300 | 7.33284700  | -0.79598400 | C  | -7.06425200 | 0.32938600  | 2.33223600  |
| H            | -7.18705200 | 8.45961300  | 0.81345000  | C  | -5.69209900 | 0.23397600  | 2.59711400  |
| C            | -2.33295300 | 4.93710500  | 2.40954100  | C  | -4.90916500 | 1.43286500  | 2.58092400  |
| C            | -2.62617900 | 6.24170300  | 2.84238500  | C  | -5.51818000 | 2.68438900  | 2.24373800  |
| C            | -1.02622100 | 4.64919300  | 1.97296500  | C  | -6.88870700 | 2.71684700  | 1.94446000  |
| C            | -1.64504200 | 7.23126000  | 2.81892100  | H  | -8.70631400 | 1.59050700  | 1.77626200  |
| H            | -3.61613800 | 6.48081800  | 3.21087300  | H  | -7.65791600 | -0.57918500 | 2.35042500  |
| C            | -0.05159900 | 5.64392300  | 1.94537600  | H  | -7.35425500 | 3.65357700  | 1.66556200  |
| H            | -0.78072100 | 3.64186100  | 1.65464300  | C  | -3.50719300 | 1.44138100  | 2.94010500  |
| C            | -0.35684500 | 6.93991800  | 2.36624800  | N  | -5.19744900 | -1.06233000 | 2.84777400  |
| H            | -1.88877400 | 8.23230200  | 3.16404200  | H  | -6.35997500 | -2.14400700 | 3.72114200  |
| H            | 0.94899900  | 5.40409300  | 1.59634600  | O  | -2.80318800 | 0.50922600  | 3.34959900  |
| H            | 0.40473900  | 7.71476400  | 2.34804700  | O  | -2.83287100 | 2.62094500  | 2.86618000  |
| C            | -3.83259400 | -1.50813500 | 1.83197500  | C  | -4.71049000 | 3.90061500  | 2.18982700  |
| O            | -3.51136900 | -1.75193900 | 0.69656600  | C  | -3.38861200 | 3.82614500  | 2.50207300  |
|              |             |             |             | C  | -5.33332100 | 5.18062000  | 1.73192800  |
| <b>INT15</b> |             |             |             | C  | -6.23700800 | 5.87653300  | 2.55127600  |
| C            | -3.20309300 | -2.90242500 | 5.80308200  | C  | -5.03862100 | 5.69736100  | 0.46211000  |
| C            | -2.07976900 | -2.08421200 | 5.83963500  | C  | -6.82022500 | 7.06715900  | 2.11495700  |
| C            | -1.33847800 | -2.28149000 | 4.57770100  | H  | -6.47757500 | 5.48264700  | 3.53542500  |
| C            | -1.95585100 | -3.33834700 | 3.84356800  | C  | -5.62207000 | 6.88784800  | 0.02599100  |
| C            | -3.20223700 | -3.61748000 | 4.51182800  | H  | -4.34591000 | 5.16286100  | -0.18161400 |
| C            | -4.14389200 | -4.73482300 | 4.16086500  | C  | -6.51279000 | 7.57672100  | 0.85122000  |

|            |             |             |             |    |             |             |             |
|------------|-------------|-------------|-------------|----|-------------|-------------|-------------|
| H          | -7.51377400 | 7.59637000  | 2.76295200  | H  | 0.40511700  | -1.32768600 | 5.51590300  |
| H          | -5.38104400 | 7.27530100  | -0.96016800 | H  | 0.29471000  | -1.47102200 | 3.75300800  |
| H          | -6.96710800 | 8.50342400  | 0.51145200  | C  | -1.03016500 | -3.87455300 | 2.99426800  |
| C          | -2.35419800 | 4.88352400  | 2.51395500  | H  | -0.42840700 | -4.68976300 | 3.41874600  |
| C          | -2.63270600 | 6.20273800  | 2.91088500  | H  | -1.66814900 | -4.30269300 | 2.21677600  |
| C          | -1.03476800 | 4.55173800  | 2.15371400  | H  | -0.34461200 | -3.17321700 | 2.51102400  |
| C          | -1.62350200 | 7.16368400  | 2.92703800  | Rh | -3.39489900 | -1.61082300 | 3.73746100  |
| H          | -3.63431100 | 6.47539500  | 3.22009000  | C  | -7.71750900 | 1.81807700  | 3.15714200  |
| C          | -0.03153900 | 5.51795600  | 2.16557700  | C  | -7.17650100 | 0.56193000  | 3.37166200  |
| H          | -0.80178600 | 3.53304600  | 1.86312400  | C  | -5.78439200 | 0.34344100  | 3.24395400  |
| C          | -0.32149900 | 6.82860300  | 2.55035200  | C  | -4.94860100 | 1.47275600  | 2.94885700  |
| H          | -1.85654800 | 8.17668300  | 3.24336800  | C  | -5.53364700 | 2.76747100  | 2.72967900  |
| H          | 0.97920400  | 5.24465500  | 1.87536900  | C  | -6.91961900 | 2.91499100  | 2.82123600  |
| H          | 0.46216300  | 7.58118400  | 2.56285200  | H  | -8.79317500 | 1.95046800  | 3.24198900  |
| C          | -8.83384600 | -3.92718100 | 4.88255100  | H  | -7.79773400 | -0.29171700 | 3.62497700  |
| H          | -9.86979400 | -4.03942800 | 4.56081300  | H  | -7.37368000 | 3.87997000  | 2.63698300  |
| H          | -8.79845100 | -3.55687800 | 5.91238400  | C  | -3.51985200 | 1.36363000  | 2.90021800  |
| H          | -8.33639700 | -4.90328000 | 4.86961800  | N  | -5.35138600 | -0.95163600 | 3.38362600  |
| C          | -8.11415900 | -2.96979200 | 3.95741400  | H  | -6.09655700 | -1.63562700 | 3.74072800  |
| O          | -8.61588300 | -2.47265900 | 2.96691000  | O  | -2.79889400 | 0.36759600  | 3.12071700  |
| O          | -6.85671700 | -2.73866100 | 4.36354800  | O  | -2.79144400 | 2.46723800  | 2.60383900  |
| C          | -4.22514500 | -1.59980800 | 2.04739000  | C  | -4.67265300 | 3.90027500  | 2.40050500  |
| O          | -4.09413100 | -1.92504700 | 0.89748000  | C  | -3.32650900 | 3.71382600  | 2.34836200  |
|            |             |             |             | C  | -5.28810900 | 5.22341600  | 2.07479000  |
| <b>TS8</b> |             |             |             | C  | -5.87357000 | 6.01044900  | 3.07967900  |
| C          | -3.49520000 | -2.81917100 | 5.69227000  | C  | -5.30599200 | 5.69197600  | 0.75347300  |
| C          | -2.49819500 | -1.82173100 | 5.84920100  | C  | -6.45028500 | 7.24326300  | 2.77073400  |
| C          | -1.48836500 | -2.04992800 | 4.82300600  | H  | -5.87097300 | 5.65385700  | 4.10641600  |
| C          | -1.84442300 | -3.20704200 | 4.06472200  | C  | -5.88336700 | 6.92460600  | 0.44488500  |
| C          | -3.12768000 | -3.65946700 | 4.55958800  | H  | -4.86162200 | 5.08685900  | -0.03150100 |
| C          | -3.84807400 | -4.90870300 | 4.15217400  | C  | -6.45497100 | 7.70415800  | 1.45212300  |
| H          | -3.30674600 | -5.43322900 | 3.36004000  | H  | -6.89496100 | 7.84313100  | 3.56025200  |
| H          | -3.92921200 | -5.58897200 | 5.01064400  | H  | -5.88775300 | 7.27401400  | -0.58398900 |
| H          | -4.85614100 | -4.68850600 | 3.77748800  | H  | -6.90418700 | 8.66374900  | 1.21129300  |
| C          | -4.73512600 | -3.01472800 | 6.50950200  | C  | -2.24333000 | 4.67026700  | 2.03381400  |
| H          | -5.63720200 | -2.99487000 | 5.88384300  | C  | -2.29060900 | 6.01651500  | 2.43505400  |
| H          | -4.69712700 | -3.99024400 | 7.01291200  | C  | -1.10633300 | 4.21219400  | 1.34208500  |
| H          | -4.83522300 | -2.24457000 | 7.27884500  | C  | -1.23891900 | 6.88031800  | 2.13525800  |
| C          | -2.42989500 | -0.75422900 | 6.90268700  | H  | -3.14267700 | 6.38591400  | 2.99247500  |
| H          | -3.42096500 | -0.52097400 | 7.30122800  | C  | -0.06095500 | 5.08172100  | 1.03982100  |
| H          | -1.79786800 | -1.06866100 | 7.74504900  | H  | -1.04886100 | 3.17181000  | 1.04060900  |
| H          | -2.00540400 | 0.17299600  | 6.50472900  | C  | -0.12314300 | 6.42009800  | 1.43327800  |
| C          | -0.26299200 | -1.20386300 | 4.65356100  | H  | -1.29058500 | 7.91611200  | 2.45924000  |
| H          | -0.52405900 | -0.14251100 | 4.58296200  | H  | 0.80408600  | 4.71151000  | 0.49650400  |



|              |             |             |            |            |             |             |             |
|--------------|-------------|-------------|------------|------------|-------------|-------------|-------------|
| H            | 0.69371700  | 7.09750600  | 1.19987800 | H          | -8.82599400 | 2.00546100  | 3.41784600  |
| C            | -8.65947800 | -4.32640200 | 3.57109700 | H          | -7.85810800 | -0.21149700 | 3.92668300  |
| H            | -8.64947800 | -5.13385000 | 2.83519600 | H          | -7.38875000 | 3.91523600  | 2.77598900  |
| H            | -9.51272800 | -3.66479100 | 3.38338200 | C          | -3.60601900 | 1.30225200  | 2.85829000  |
| H            | -8.79934400 | -4.74779000 | 4.57399300 | N          | -5.36019200 | -0.79762800 | 3.98290300  |
| C            | -7.35427000 | -3.52308000 | 3.52501000 | H          | -6.09269000 | -1.53820000 | 4.10398700  |
| O            | -6.44113900 | -3.88928900 | 2.75261700 | O          | -2.91192400 | 0.24834500  | 2.91302700  |
| O            | -7.29674900 | -2.51229700 | 4.31550000 | O          | -2.84898200 | 2.36912500  | 2.49178500  |
| C            | -4.39143600 | -1.74092400 | 2.07492500 | C          | -4.68625800 | 3.87951900  | 2.46644200  |
| O            | -4.72972000 | -1.79547700 | 0.96347000 | C          | -3.35479000 | 3.64393900  | 2.32193100  |
| <b>INT16</b> |             |             |            | C          | -5.27061700 | 5.22665800  | 2.18906900  |
| C            | -3.56444800 | -2.69997200 | 5.69022100 | C          | -5.81194400 | 6.00321700  | 3.22661100  |
| C            | -2.61799300 | -1.62439600 | 5.70761200 | C          | -5.30604100 | 5.73114100  | 0.88118200  |
| C            | -1.55275200 | -1.95403000 | 4.76441400 | C          | -6.35955500 | 7.25943600  | 2.96312800  |
| C            | -1.88273400 | -3.17082600 | 4.11837800 | H          | -5.79878400 | 5.61780500  | 4.24255200  |
| C            | -3.16107300 | -3.62618200 | 4.66526400 | C          | -5.85572200 | 6.98651300  | 0.61740300  |
| C            | -3.84977700 | -4.91925900 | 4.35234900 | H          | -4.89746400 | 5.13444900  | 0.07074300  |
| H            | -3.20511600 | -5.57858500 | 3.76390500 | C          | -6.38157100 | 7.75523900  | 1.65736500  |
| H            | -4.11337000 | -5.44150700 | 5.27983300 | H          | -6.76911400 | 7.85032300  | 3.77814700  |
| H            | -4.77212800 | -4.73570600 | 3.78212200 | H          | -5.87437800 | 7.36232700  | -0.40206900 |
| C            | -4.78800900 | -2.85291900 | 6.53871600 | H          | -6.80903200 | 8.73294500  | 1.45198300  |
| H            | -5.68368300 | -3.01228500 | 5.92438900 | C          | -2.26041600 | 4.57392200  | 1.96786300  |
| H            | -4.66867700 | -3.71954700 | 7.20324100 | C          | -2.23014800 | 5.90231200  | 2.42627400  |
| H            | -4.95559100 | -1.97169100 | 7.16205500 | C          | -1.18974600 | 4.10836100  | 1.18201300  |
| C            | -2.60911300 | -0.44784900 | 6.63862300 | C          | -1.17053200 | 6.74277100  | 2.09021700  |
| H            | -3.62478800 | -0.15178000 | 6.91291900 | H          | -3.03014900 | 6.27494900  | 3.05468700  |
| H            | -2.06491100 | -0.68390400 | 7.56349600 | C          | -0.13534600 | 4.95423900  | 0.84477500  |
| H            | -2.12073800 | 0.41654400  | 6.17929200 | H          | -1.19199400 | 3.08046700  | 0.83549400  |
| C            | -0.35536100 | -1.08831200 | 4.51721800 | C          | -0.12168200 | 6.27587900  | 1.29534300  |
| H            | -0.66126300 | -0.09241800 | 4.17714300 | H          | -1.16268600 | 7.76504100  | 2.45845900  |
| H            | 0.22452100  | -0.96646100 | 5.44054000 | H          | 0.67734500  | 4.57887100  | 0.22874400  |
| H            | 0.30316800  | -1.51516300 | 3.75735200 | H          | 0.70193500  | 6.93482000  | 1.03411800  |
| C            | -1.04745200 | -3.93084000 | 3.12803100 | C          | -8.41940100 | -4.44058900 | 3.08764900  |
| H            | -0.46135400 | -4.70828500 | 3.63651300 | H          | -8.27452800 | -5.09455300 | 2.22462700  |
| H            | -1.66721500 | -4.42697200 | 2.37626200 | H          | -9.29345000 | -3.80010700 | 2.92448300  |
| H            | -0.34686200 | -3.27646500 | 2.60277500 | H          | -8.63245000 | -5.04835500 | 3.97535100  |
| Rh           | -3.53705300 | -1.64581500 | 3.66629900 | C          | -7.18137800 | -3.56969600 | 3.34561700  |
| C            | -7.74970600 | 1.86172500  | 3.35569100 | O          | -6.17175400 | -3.75478000 | 2.61064700  |
| C            | -7.22684300 | 0.62355100  | 3.63858300 | O          | -7.27694300 | -2.73495600 | 4.29983100  |
| C            | -5.81300100 | 0.38416600  | 3.57031600 | C          | -4.18121200 | -2.21414700 | 1.89623800  |
| C            | -4.98626200 | 1.48143900  | 3.10719000 | O          | -4.39153900 | -2.42805700 | 0.79495600  |
| C            | -5.56637600 | 2.78135400  | 2.86122700 | <b>TS9</b> |             |             |             |
| C            | -6.93832800 | 2.95336400  | 2.98352300 | C          | -3.32062000 | -2.64155100 | 6.19102300  |

|    |             |             |            |              |             |             |             |
|----|-------------|-------------|------------|--------------|-------------|-------------|-------------|
| C  | -2.31042800 | -1.59689600 | 6.24758300 | C            | -6.36887100 | 7.32912500  | 2.64610700  |
| C  | -1.33425700 | -1.86012400 | 5.19284600 | H            | -5.67424600 | 5.90400300  | 4.10614000  |
| C  | -1.78617900 | -2.97646500 | 4.44905300 | C            | -6.04743300 | 6.71074400  | 0.33424800  |
| C  | -3.02020700 | -3.46760300 | 5.06634600 | H            | -5.09891200 | 4.80499300  | -0.00654400 |
| C  | -3.80461900 | -4.66714300 | 4.64571600 | C            | -6.50460300 | 7.62275600  | 1.28720600  |
| H  | -3.28607200 | -5.23096400 | 3.86570800 | H            | -6.72414700 | 8.03248600  | 3.39455400  |
| H  | -3.95721000 | -5.33296300 | 5.50473700 | H            | -6.15410600 | 6.92907900  | -0.72492600 |
| H  | -4.79591600 | -4.36872800 | 4.26457900 | H            | -6.96681100 | 8.55487600  | 0.97369000  |
| C  | -4.45323400 | -2.85643900 | 7.14923100 | C            | -2.30465600 | 4.56076300  | 1.75738500  |
| H  | -4.31169300 | -3.80758600 | 7.68019900 | C            | -2.27341600 | 5.94392500  | 2.00556800  |
| H  | -4.49698600 | -2.06080700 | 7.89765400 | C            | -1.27936200 | 3.99324400  | 0.97805400  |
| H  | -5.42082900 | -2.88782600 | 6.63119100 | C            | -1.25846200 | 6.73581700  | 1.47189400  |
| C  | -2.16466800 | -0.56371100 | 7.32232700 | H            | -3.03668200 | 6.39897700  | 2.62517200  |
| H  | -3.13595400 | -0.26792100 | 7.72614100 | C            | -0.27003100 | 4.79026200  | 0.44255000  |
| H  | -1.56166800 | -0.96147100 | 8.15099800 | H            | -1.28154600 | 2.92443600  | 0.79322100  |
| H  | -1.66383500 | 0.33360300  | 6.94823600 | C            | -0.25594000 | 6.16542800  | 0.68487200  |
| C  | -0.10898500 | -1.03322000 | 4.94239300 | H            | -1.24866500 | 7.80234000  | 1.67950900  |
| H  | 0.64220700  | -1.21517600 | 5.72208400 | H            | 0.50750700  | 4.33490700  | -0.16485800 |
| H  | 0.34537800  | -1.26905200 | 3.97723700 | H            | 0.53284700  | 6.78639000  | 0.26893300  |
| H  | -0.34383900 | 0.03587800  | 4.94498600 | C            | -8.67764000 | -3.79828200 | 4.30099300  |
| C  | -1.11860600 | -3.60221000 | 3.26134600 | H            | -8.95371800 | -4.21964200 | 5.27417900  |
| H  | -0.51621400 | -4.46730600 | 3.57031000 | H            | -8.70487700 | -4.57771000 | 3.53550900  |
| H  | -1.85419000 | -3.95356300 | 2.53311000 | H            | -9.42625400 | -3.03312300 | 4.06163400  |
| H  | -0.45536500 | -2.89634900 | 2.75472900 | C            | -7.28829500 | -3.14794400 | 4.38309200  |
| Rh | -3.35737800 | -1.33961700 | 4.40459300 | O            | -7.12386100 | -2.31878600 | 5.34162500  |
| C  | -7.63617200 | 2.02812000  | 3.90655200 | O            | -6.43462300 | -3.46561600 | 3.51771100  |
| C  | -7.07438700 | 0.83728400  | 4.30259100 | C            | -4.47182100 | -2.03882900 | 2.11599500  |
| C  | -5.67484300 | 0.58920600  | 4.12410700 | O            | -5.15261900 | -1.72982300 | 1.25772500  |
| C  | -4.89578600 | 1.63208200  | 3.49095100 |              |             |             |             |
| C  | -5.50815100 | 2.88442800  | 3.12541100 | <b>INT17</b> |             |             |             |
| C  | -6.87190800 | 3.06030800  | 3.32764000 | C            | -3.95253800 | -3.99858000 | 4.79859400  |
| H  | -8.70341500 | 2.18171100  | 4.04761000 | C            | -2.84536800 | -3.05805900 | 4.79436400  |
| H  | -7.66507400 | 0.04454100  | 4.75160600 | C            | -2.38054700 | -2.94728300 | 3.44997600  |
| H  | -7.35066700 | 3.98508400  | 3.03235800 | C            | -3.15507000 | -3.84838600 | 2.61081300  |
| C  | -3.52442200 | 1.43864300  | 3.19788500 | C            | -4.09928600 | -4.51080900 | 3.45429500  |
| N  | -5.17664500 | -0.57500800 | 4.55138100 | C            | -5.09328100 | -5.55317500 | 3.04284800  |
| H  | -5.89251000 | -1.24250700 | 4.93861000 | H            | -5.32660300 | -5.48801800 | 1.97706700  |
| O  | -2.81956700 | 0.40980400  | 3.37533900 | H            | -4.68799400 | -6.55541300 | 3.23951000  |
| O  | -2.80919400 | 2.45299900  | 2.64257600 | H            | -6.02385300 | -5.44126600 | 3.60397500  |
| C  | -4.67504300 | 3.92496600  | 2.52444900 | C            | -4.70174400 | -4.48174000 | 6.00449700  |
| C  | -3.35218000 | 3.68209800  | 2.32213400 | H            | -5.77315900 | -4.52805900 | 5.79264000  |
| C  | -5.30423000 | 5.21173600  | 2.09772700 | H            | -4.35275400 | -5.47862500 | 6.30715200  |
| C  | -5.77663000 | 6.13116500  | 3.04832400 | H            | -4.55359400 | -3.80872600 | 6.85428700  |
| C  | -5.45372900 | 5.51343200  | 0.73647400 | C            | -2.31612900 | -2.34923900 | 6.00523000  |

|    |             |             |             |              |             |             |             |
|----|-------------|-------------|-------------|--------------|-------------|-------------|-------------|
| H  | -3.12809000 | -1.88736500 | 6.57575300  | C            | -2.94395400 | 3.27242900  | -1.88399000 |
| H  | -1.79282200 | -3.05102300 | 6.66762300  | H            | -3.96933400 | 1.69725800  | -0.83663800 |
| H  | -1.61231300 | -1.55806500 | 5.73449400  | C            | -2.42572300 | 4.56716900  | -1.81211100 |
| C  | -1.28665800 | -2.05980500 | 2.93709800  | H            | -2.12841300 | 6.29163300  | -0.55031900 |
| H  | -0.91774200 | -1.38117200 | 3.70988600  | H            | -2.85577100 | 2.69917500  | -2.80300000 |
| H  | -0.43991400 | -2.66147600 | 2.58224700  | H            | -1.93075200 | 5.00743100  | -2.67356900 |
| H  | -1.64246900 | -1.45135500 | 2.09895800  | C            | -8.74626900 | -2.79747800 | 2.56680200  |
| C  | -2.92700300 | -4.07819400 | 1.14601700  | H            | -9.13095000 | -1.77545000 | 2.66769400  |
| H  | -2.11368300 | -4.79834700 | 0.97876700  | H            | -8.62143100 | -2.99886700 | 1.49919300  |
| H  | -3.82431800 | -4.47093100 | 0.66031800  | H            | -9.47167100 | -3.48790700 | 3.00345100  |
| H  | -2.65651400 | -3.14819700 | 0.63643300  | C            | -7.41402800 | -2.90128800 | 3.30780700  |
| Rh | -4.53647400 | -2.32350000 | 3.51503000  | O            | -7.36321700 | -3.36964400 | 4.45235400  |
| C  | -7.08568800 | 2.13354300  | 5.54652600  | O            | -6.41310600 | -2.43730000 | 2.61906600  |
| C  | -6.73349700 | 0.80542400  | 5.60905400  |              |             |             |             |
| C  | -5.82171000 | 0.22365600  | 4.67161600  | <b>INT18</b> |             |             |             |
| C  | -5.35257500 | 1.08845700  | 3.60779700  | C            | -3.19845900 | -2.48630100 | 5.83008200  |
| C  | -5.70729000 | 2.48467800  | 3.59199100  | C            | -2.08218800 | -1.59507200 | 5.78741400  |
| C  | -6.57152000 | 2.99068500  | 4.55894200  | C            | -1.11013300 | -2.12511600 | 4.82982200  |
| H  | -7.78065700 | 2.53225800  | 6.28218500  | C            | -1.65878100 | -3.30658700 | 4.26843400  |
| H  | -7.13517900 | 0.16528600  | 6.39058000  | C            | -2.97936400 | -3.52080600 | 4.84492200  |
| H  | -6.86409300 | 4.03212600  | 4.53983400  | C            | -3.83775400 | -4.73333700 | 4.65002700  |
| C  | -4.58384800 | 0.57351700  | 2.52499700  | H            | -3.74273900 | -5.12389400 | 3.63625400  |
| N  | -5.42596400 | -1.04233800 | 4.84354200  | H            | -3.54729700 | -5.51853400 | 5.36360700  |
| H  | -6.01780700 | -1.55705900 | 5.48942500  | H            | -4.89324600 | -4.49866200 | 4.80759800  |
| O  | -4.24902400 | -0.60414000 | 2.27362700  | C            | -4.40886100 | -2.37987700 | 6.70786500  |
| O  | -4.11877200 | 1.44115300  | 1.57829000  | H            | -5.32009500 | -2.63707800 | 6.16043800  |
| C  | -5.17472300 | 3.34124700  | 2.53342200  | H            | -4.31988800 | -3.07088400 | 7.55683100  |
| C  | -4.38120800 | 2.79255700  | 1.57500000  | H            | -4.53176000 | -1.37047300 | 7.10825400  |
| C  | -5.55511400 | 4.78617200  | 2.49723100  | C            | -1.86871400 | -0.36878500 | 6.62207700  |
| C  | -5.07034400 | 5.68121300  | 3.46488600  | H            | -2.80932500 | 0.00332900  | 7.03613600  |
| C  | -6.42138800 | 5.27101000  | 1.50691300  | H            | -1.19280400 | -0.58444900 | 7.46078300  |
| C  | -5.43030900 | 7.02914400  | 3.43191600  | H            | -1.42119900 | 0.43474600  | 6.02930700  |
| H  | -4.40651800 | 5.31450700  | 4.24325400  | C            | 0.21660600  | -1.49389100 | 4.52950300  |
| C  | -6.78275200 | 6.61877500  | 1.47440300  | H            | 0.11254800  | -0.41571600 | 4.36858500  |
| H  | -6.80874100 | 4.58517900  | 0.75891200  | H            | 0.91786700  | -1.64318800 | 5.36174000  |
| C  | -6.28679100 | 7.50222400  | 2.43492000  | H            | 0.66908000  | -1.92019200 | 3.63055900  |
| H  | -5.04144800 | 7.70940400  | 4.18514300  | C            | -1.03876000 | -4.19272200 | 3.23168800  |
| H  | -7.45393000 | 6.97729700  | 0.69847000  | H            | -0.59873000 | -5.08077400 | 3.70538200  |
| H  | -6.56804500 | 8.55160000  | 2.40935300  | H            | -1.79315900 | -4.53032800 | 2.51663700  |
| C  | -3.71449000 | 3.43228300  | 0.41885100  | H            | -0.24935800 | -3.67902800 | 2.67745000  |
| C  | -3.17736700 | 4.72956400  | 0.48414100  | Rh           | -3.03510800 | -1.58751100 | 3.79831100  |
| C  | -3.57594900 | 2.70635900  | -0.77899600 | C            | -7.52535100 | 1.42528100  | 2.70230900  |
| C  | -2.54139900 | 5.28910700  | -0.62254100 | C            | -6.92001600 | 0.24912800  | 3.07012000  |
| H  | -3.24620200 | 5.29738500  | 1.40404700  | C            | -5.49435800 | 0.14764400  | 3.20791900  |

|   |             |             |             |             |             |             |            |
|---|-------------|-------------|-------------|-------------|-------------|-------------|------------|
| C | -4.72770600 | 1.34113000  | 2.90003100  | H           | -8.89121400 | -5.65693200 | 3.05971400 |
| C | -5.39822900 | 2.56006200  | 2.51673000  | H           | -9.50556800 | -4.21143700 | 2.26028200 |
| C | -6.78501200 | 2.59151400  | 2.43013700  | H           | -9.36316700 | -4.23588800 | 4.04341100 |
| H | -8.60981600 | 1.45963700  | 2.62241100  | C           | -7.49886000 | -4.01840100 | 3.00035000 |
| H | -7.50876300 | -0.63709700 | 3.28852700  | O           | -6.89387000 | -4.42100300 | 1.89314000 |
| H | -7.29604500 | 3.50585200  | 2.15926800  | O           | -7.00031500 | -3.28895600 | 3.85187900 |
| C | -3.31093300 | 1.35153700  | 3.00303800  |             |             |             |            |
| N | -4.97337400 | -1.00237400 | 3.63010200  | <b>TS10</b> |             |             |            |
| H | -5.64801500 | -1.76322900 | 3.70477600  | C           | -3.80800600 | -2.39893800 | 5.61794600 |
| O | -2.52494900 | 0.42310900  | 3.30063200  | C           | -2.86293900 | -1.31472700 | 5.61812200 |
| O | -2.63715500 | 2.51603200  | 2.76442300  | C           | -1.64033500 | -1.78582300 | 4.96091000 |
| C | -4.59718900 | 3.75459500  | 2.24917900  | C           | -1.86622200 | -3.10621300 | 4.50212100 |
| C | -3.24562500 | 3.68958700  | 2.38018600  | C           | -3.23348000 | -3.48182200 | 4.86167700 |
| C | -5.28376300 | 5.03665700  | 1.90339900  | C           | -3.88065900 | -4.80731800 | 4.60954300 |
| C | -5.32460400 | 6.09441300  | 2.82292000  | H           | -3.16932800 | -5.51409000 | 4.17371900 |
| C | -5.91660100 | 5.20060800  | 0.66040200  | H           | -4.25112500 | -5.23302200 | 5.55090100 |
| C | -5.96760100 | 7.29148200  | 2.50433000  | H           | -4.73264200 | -4.70329600 | 3.91741300 |
| H | -4.84402800 | 5.97504100  | 3.78976000  | C           | -5.15627000 | -2.43711400 | 6.26553400 |
| C | -6.55926000 | 6.39763700  | 0.34102500  | H           | -5.93421500 | -2.75486100 | 5.55655000 |
| H | -5.89897400 | 4.38446000  | -0.05690000 | H           | -5.13541600 | -3.15536500 | 7.09696700 |
| C | -6.58519600 | 7.44760400  | 1.26208200  | H           | -5.43671300 | -1.46263900 | 6.67439300 |
| H | -5.98679500 | 8.10152900  | 3.22866800  | C           | -3.00263200 | -0.00115700 | 6.32852400 |
| H | -7.03876200 | 6.50991200  | -0.62791200 | H           | -4.04847300 | 0.31065900  | 6.39330300 |
| H | -7.08554900 | 8.37975900  | 1.01362200  | H           | -2.60883100 | -0.06951600 | 7.35207500 |
| C | -2.22633900 | 4.74565400  | 2.18677900  | H           | -2.44690600 | 0.78860200  | 5.81378300 |
| C | -1.08719500 | 4.75775000  | 3.01303800  | C           | -0.40830900 | -0.95147800 | 4.78375300 |
| C | -2.33343200 | 5.71876400  | 1.17836200  | H           | -0.64826200 | -0.00137900 | 4.29381300 |
| C | -0.10275700 | 5.73060900  | 2.85448000  | H           | 0.04451600  | -0.72306900 | 5.75706900 |
| H | -0.98027400 | 3.99853000  | 3.78031200  | H           | 0.34054100  | -1.46063600 | 4.17286000 |
| C | -1.34308200 | 6.68659300  | 1.01982500  | C           | -0.94076500 | -3.98144000 | 3.71520200 |
| H | -3.18545000 | 5.71204700  | 0.50936600  | H           | -0.66921700 | -4.87397100 | 4.29287600 |
| C | -0.22712200 | 6.70174300  | 1.85879100  | H           | -1.42983600 | -4.30861500 | 2.79154500 |
| H | 0.76487700  | 5.72762100  | 3.50899000  | H           | -0.01979900 | -3.45926900 | 3.44468700 |
| H | -1.44220000 | 7.42679000  | 0.23043200  | Rh          | -3.36806100 | -1.74125700 | 3.54141200 |
| H | 0.54241400  | 7.45865000  | 1.73284000  | C           | -7.53724500 | 1.70403500  | 3.67023300 |
| C | -3.83602200 | -2.69560100 | 1.15473200  | C           | -7.03778000 | 0.41087100  | 3.60477400 |
| C | -4.01568300 | -2.57816700 | -0.35446000 | C           | -5.71096300 | 0.17611900  | 3.18234800 |
| H | -3.88773800 | -3.56015200 | -0.82032700 | C           | -4.88991800 | 1.31088000  | 2.87906000 |
| H | -5.04106400 | -2.24814100 | -0.56110600 | C           | -5.42660300 | 2.63752900  | 2.93625100 |
| H | -3.31920000 | -1.85872500 | -0.78913500 | C           | -6.75760900 | 2.81289300  | 3.33162800 |
| O | -3.09459100 | -1.79854900 | 1.68900200  | H           | -8.56759600 | 1.85773400  | 3.98156500 |
| O | -4.39980300 | -3.62764600 | 1.77248900  | H           | -7.65428900 | -0.45388700 | 3.83454100 |
| H | -5.94547900 | -4.07411800 | 1.83761200  | H           | -7.18433600 | 3.80720400  | 3.36745500 |
| C | -8.90742400 | -4.56305800 | 3.10809500  | C           | -3.51213800 | 1.14398100  | 2.51052100 |

|   |             |             |             |              |             |             |            |
|---|-------------|-------------|-------------|--------------|-------------|-------------|------------|
| N | -5.28837200 | -1.12414400 | 2.99742100  | <b>INT19</b> |             |             |            |
| H | -5.99591300 | -1.80931300 | 3.37044400  | C            | -3.98235500 | -1.45467700 | 6.47384000 |
| O | -2.82679500 | 0.10350300  | 2.51384400  | C            | -2.95855000 | -0.71382800 | 5.80518200 |
| O | -2.80864300 | 2.24307600  | 2.13177000  | C            | -1.93431900 | -1.63359500 | 5.36553700 |
| C | -4.58699100 | 3.76648900  | 2.54437100  | C            | -2.28364600 | -2.94453700 | 5.88240500 |
| C | -3.30913700 | 3.52946100  | 2.13997900  | C            | -3.55252000 | -2.84579800 | 6.53267800 |
| C | -5.17156600 | 5.14222900  | 2.52242900  | C            | -4.35053800 | -3.94967800 | 7.15546200 |
| C | -5.45832500 | 5.81799700  | 3.71944300  | H            | -5.30235200 | -4.06463100 | 6.62297400 |
| C | -5.46682500 | 5.77154200  | 1.30464900  | H            | -3.82187000 | -4.90497300 | 7.10774600 |
| C | -6.01212800 | 7.09889400  | 3.69753200  | H            | -4.56536400 | -3.72849300 | 8.20835300 |
| H | -5.24075100 | 5.33641600  | 4.66926600  | C            | -5.22881900 | -0.91378100 | 7.10737400 |
| C | -6.02141000 | 7.05203300  | 1.28305200  | H            | -6.06689900 | -1.60224500 | 6.96274200 |
| H | -5.25629700 | 5.25331100  | 0.37358000  | H            | -5.09096600 | -0.77152400 | 8.18836400 |
| C | -6.29338400 | 7.72001300  | 2.47846400  | H            | -5.51056500 | 0.05120000  | 6.67693600 |
| H | -6.22314800 | 7.61098800  | 4.63253400  | C            | -2.92089300 | 0.77255400  | 5.64088600 |
| H | -6.24270000 | 7.52636600  | 0.33082200  | H            | -3.91275100 | 1.18809400  | 5.44242300 |
| H | -6.72463300 | 8.71718100  | 2.46099700  | H            | -2.54850300 | 1.23199700  | 6.56677400 |
| C | -2.27436200 | 4.47279200  | 1.66294000  | H            | -2.25337400 | 1.06502500  | 4.82954500 |
| C | -2.13248800 | 5.76502000  | 2.19726600  | C            | -0.66193000 | -1.27403800 | 4.65606600 |
| C | -1.37356900 | 4.05182400  | 0.66677000  | H            | -0.83085000 | -0.48631800 | 3.91779700 |
| C | -1.13094700 | 6.61562900  | 1.73284700  | H            | 0.10156800  | -0.93076200 | 5.36871100 |
| H | -2.79650600 | 6.10112400  | 2.98430800  | H            | -0.26030000 | -2.13476200 | 4.11584800 |
| C | -0.37866800 | 4.90881300  | 0.20186400  | C            | -1.47939300 | -4.19295300 | 5.67997300 |
| H | -1.45956900 | 3.05059600  | 0.25846800  | H            | -0.40882300 | -3.98277900 | 5.77097800 |
| C | -0.25391400 | 6.19503300  | 0.73111500  | H            | -1.73966100 | -4.95841800 | 6.41621400 |
| H | -1.03295600 | 7.60888700  | 2.16224900  | H            | -1.66904700 | -4.60146200 | 4.68026700 |
| H | 0.30126000  | 4.56917300  | -0.57459500 | Rh           | -3.82014500 | -2.26814200 | 4.41539900 |
| H | 0.52429100  | 6.86194000  | 0.37014400  | C            | -7.27250300 | 1.20804600  | 3.13380300 |
| C | -4.16437800 | -2.88558100 | 0.79281800  | C            | -6.48521800 | 0.06284100  | 3.05344600 |
| C | -4.19818500 | -4.02389200 | -0.19089300 | C            | -5.11514600 | 0.15881900  | 2.77742300 |
| H | -4.93034500 | -4.73738400 | 0.20717200  | C            | -4.54210300 | 1.44807800  | 2.59220300 |
| H | -4.54412100 | -3.67878500 | -1.16826800 | C            | -5.35509700 | 2.61680100  | 2.67936300 |
| H | -3.22283300 | -4.50780000 | -0.27111600 | C            | -6.72632100 | 2.47300500  | 2.94991200 |
| O | -3.27644400 | -2.87584200 | 1.69016900  | H            | -8.33645900 | 1.10799100  | 3.33171100 |
| O | -5.07884000 | -1.99338500 | 0.67690300  | H            | -6.92195800 | -0.92165400 | 3.16598000 |
| H | -5.18335600 | -1.47698900 | 1.70011000  | H            | -7.35943000 | 3.34991900  | 3.00116000 |
| C | -8.59909100 | -4.50300400 | 2.79798200  | C            | -3.12268000 | 1.59393100  | 2.28693900 |
| H | -9.05679600 | -4.82449100 | 3.74125000  | N            | -4.38578500 | -1.04961500 | 2.66127000 |
| H | -8.50632800 | -5.36013000 | 2.12635900  | H            | -4.99054500 | -1.79448800 | 2.25121200 |
| H | -9.27346300 | -3.76081000 | 2.35492100  | O            | -2.29329900 | 0.70691300  | 2.21883300 |
| C | -7.23114600 | -3.86317100 | 3.07655300  | O            | -2.66295000 | 2.87738000  | 2.07414400 |
| O | -6.21336900 | -4.36708500 | 2.54458800  | C            | -4.75903600 | 3.93293800  | 2.45166200 |
| O | -7.24753000 | -2.84673100 | 3.85485800  | C            | -3.43115400 | 4.01238000  | 2.15841200 |
|   |             |             |             | C            | -5.63365900 | 5.14550700  | 2.47091200 |

|              |             |             |             |    |             |             |             |
|--------------|-------------|-------------|-------------|----|-------------|-------------|-------------|
| C            | -6.16858500 | 5.63072200  | 3.67546600  | H  | -1.73646800 | 3.60881300  | -0.23208200 |
| C            | -5.95683900 | 5.80751300  | 1.27740000  | H  | -1.07623100 | 5.25459900  | -0.19705800 |
| C            | -6.99276400 | 6.75711100  | 3.68681800  | H  | -1.22835900 | 4.30579400  | 1.29896100  |
| H            | -5.92951600 | 5.12417600  | 4.60710700  | C  | -2.88241700 | 5.94471700  | 2.99680000  |
| C            | -6.78025300 | 6.93422400  | 1.28824300  | H  | -2.16019500 | 5.14465200  | 3.17782700  |
| H            | -5.55407900 | 5.43658100  | 0.33930100  | H  | -2.33460900 | 6.89694300  | 2.98581300  |
| C            | -7.29945500 | 7.41329200  | 2.49248500  | H  | -3.57583000 | 5.96830800  | 3.84187000  |
| H            | -7.39330900 | 7.12259900  | 4.62870700  | C  | -5.83399200 | 7.01378300  | 2.25662600  |
| H            | -7.01738300 | 7.43619700  | 0.35410200  | H  | -5.70076800 | 6.76027300  | 3.31196200  |
| H            | -7.94076700 | 8.29040700  | 2.50071200  | H  | -5.62393100 | 8.08658200  | 2.14112000  |
| C            | -2.60244900 | 5.20585500  | 1.87361800  | H  | -6.88806500 | 6.85702200  | 2.00621200  |
| C            | -2.80384700 | 6.43704300  | 2.52103100  | C  | -6.41390900 | 6.32259500  | -0.77699700 |
| C            | -1.54556300 | 5.09425600  | 0.95084500  | H  | -7.29633100 | 5.93987500  | -0.25295000 |
| C            | -1.98516400 | 7.52821400  | 2.23564900  | H  | -6.51416300 | 7.41389800  | -0.84488800 |
| H            | -3.59168700 | 6.53935600  | 3.25729200  | H  | -6.42967300 | 5.91917000  | -1.79221700 |
| C            | -0.73546300 | 6.19039400  | 0.66360900  | C  | -3.80227600 | 4.79390100  | -1.96645400 |
| H            | -1.36406700 | 4.14302400  | 0.46275900  | H  | -3.01233500 | 5.37608200  | -2.45976600 |
| C            | -0.95271900 | 7.41282000  | 1.30276200  | H  | -3.48882200 | 3.74450300  | -1.97168200 |
| H            | -2.15217000 | 8.47006800  | 2.75112000  | H  | -4.70526500 | 4.87445400  | -2.57727600 |
| H            | 0.06964100  | 6.08698800  | -0.05866300 | Rh | -4.92475000 | 4.02771200  | 1.19577400  |
| H            | -0.31793100 | 8.26650200  | 1.08125100  | C  | -6.73732800 | -1.45610500 | 4.07787200  |
| C            | -2.61180900 | -3.53038400 | 1.94998400  | C  | -7.95097100 | -2.34608000 | 4.18751300  |
| C            | -2.36727300 | -4.78930900 | 1.12084700  | H  | -8.57659500 | -2.02786600 | 5.02789000  |
| H            | -1.64801500 | -4.57921600 | 0.32639600  | H  | -8.52214000 | -2.30289900 | 3.25983600  |
| H            | -2.01051100 | -5.61223900 | 1.74793000  | H  | -7.63929100 | -3.37720700 | 4.38507700  |
| H            | -3.31552100 | -5.10658200 | 0.67171500  | C  | -7.04551000 | 0.74711200  | 0.11072500  |
| O            | -3.24732300 | -3.77287300 | 3.06364100  | H  | -8.06818600 | 1.01953500  | -0.16093900 |
| O            | -2.24396900 | -2.42411200 | 1.54696600  | H  | -7.06518400 | 0.08925100  | 0.98759700  |
| H            | -3.47998200 | -0.98729600 | 2.17981900  | H  | -6.56519100 | 0.20463200  | -0.70842900 |
| C            | -7.33094500 | -4.72931700 | 3.46578100  | C  | -6.24421800 | 1.97248700  | 0.45582300  |
| H            | -8.00758800 | -4.79313500 | 2.61103000  | O  | -6.82830300 | 3.05878900  | 0.79980100  |
| H            | -7.89963600 | -4.60006800 | 4.39175500  | O  | -4.97560400 | 1.94649500  | 0.45242800  |
| H            | -6.77332800 | -5.66974300 | 3.54951000  | O  | -6.01476700 | -1.45639500 | 5.22100700  |
| C            | -6.33986900 | -3.58574000 | 3.27314800  | O  | -6.41668300 | -0.81127700 | 3.10217800  |
| O            | -5.72062100 | -3.23680500 | 4.35464300  | C  | -6.65954100 | 3.19630800  | 5.02893600  |
| O            | -6.19563100 | -3.07632200 | 2.14755200  | C  | -5.85424000 | 2.25095100  | 5.65769500  |
|              |             |             |             | C  | -4.69752200 | 1.82854800  | 5.00674100  |
| <b>INT20</b> |             |             |             | C  | -4.32501000 | 2.35581500  | 3.74999600  |
| C            | -3.60341800 | 5.74283000  | 1.69689900  | C  | -5.16026600 | 3.29503200  | 3.09461400  |
| C            | -4.93596600 | 6.19443100  | 1.37750200  | C  | -6.32594600 | 3.69415600  | 3.76727800  |
| C            | -5.15499800 | 5.95380600  | -0.05195700 | H  | -7.56986700 | 3.53279600  | 5.51957800  |
| C            | -4.03247400 | 5.28209800  | -0.56630900 | H  | -6.12324600 | 1.83329500  | 6.62438200  |
| C            | -3.07693200 | 5.10909600  | 0.52738000  | H  | -5.24740600 | -0.86528000 | 5.07333000  |
| C            | -1.70592800 | 4.53582800  | 0.34687400  | H  | -7.01035700 | 4.38610600  | 3.28725100  |

|   |             |             |            |   |             |             |            |
|---|-------------|-------------|------------|---|-------------|-------------|------------|
| C | -3.04351900 | 1.92104100  | 3.18029900 | C | -6.72213900 | 2.21873500  | 0.45561300 |
| N | -3.90206500 | 0.82994500  | 5.59255000 | O | -7.12918200 | 3.38133900  | 0.80139100 |
| H | -4.06262800 | 0.58749800  | 6.56333900 | O | -5.47848100 | 1.98017900  | 0.46116400 |
| C | -2.66681000 | 0.42750800  | 5.11634800 | O | -6.08635600 | -1.16228600 | 5.64865000 |
| O | -2.32819500 | 0.93531000  | 3.89904600 | O | -4.73381400 | -0.84802700 | 3.87278400 |
| O | -2.50027200 | 2.32472400  | 2.18599800 | C | -6.94399600 | 3.49102900  | 5.03709800 |
| O | -1.94018300 | -0.33208100 | 5.70846300 | C | -6.25520400 | 2.47014100  | 5.69211600 |

**TS11**

|   |             |            |             |   |             |             |            |
|---|-------------|------------|-------------|---|-------------|-------------|------------|
| C | -3.51209400 | 5.52800000 | 1.69176200  | C | -5.43007000 | 3.34591600  | 3.10943000 |
| C | -4.76909700 | 6.17862400 | 1.40808900  | C | -6.54169400 | 3.90288900  | 3.76732900 |
| C | -5.05590000 | 5.98682600 | -0.01707800 | H | -7.81008600 | 3.94698900  | 5.51012600 |
| C | -4.05848200 | 5.15975200 | -0.56380800 | H | -6.57450800 | 2.10657200  | 6.66469600 |
| C | -3.11264800 | 4.83923200 | 0.50338500  | H | -5.22581100 | 0.01170600  | 5.96816700 |
| C | -1.84960300 | 4.06670200 | 0.28359500  | H | -7.12468000 | 4.66692600  | 3.26282300 |
| H | -2.04571400 | 3.12258400 | -0.23245300 | C | -3.47744100 | 1.73686500  | 3.22218500 |
| H | -1.16460800 | 4.65823300 | -0.34042700 | N | -4.48195600 | 0.79916900  | 5.72773100 |
| H | -1.34906800 | 3.82486400 | 1.22032500  | H | -3.97515800 | 1.08864000  | 6.56960900 |
| C | -2.73960200 | 5.59648600 | 2.97531800  | C | -3.47881100 | -0.05241800 | 4.90115300 |
| H | -2.20855700 | 4.66050100 | 3.16410400  | O | -2.86906300 | 0.71354200  | 3.91630100 |
| H | -1.99863000 | 6.40640700 | 2.93392700  | O | -2.89604300 | 2.14944600  | 2.24762300 |
| H | -3.39616100 | 5.79009700 | 3.82779800  | O | -2.83856300 | -0.85096200 | 5.53566500 |
| C | -5.51346000 | 7.11679200 | 2.31184000  |   |             |             |            |
| H | -5.40412400 | 6.83378900 | 3.36237300  |   |             |             |            |

**INT21**

|    |             |             |             |   |             |            |             |
|----|-------------|-------------|-------------|---|-------------|------------|-------------|
| H  | -5.14002700 | 8.14472900  | 2.20229700  | C | -3.08140400 | 4.37962000 | 1.40650200  |
| H  | -6.58306300 | 7.13003000  | 2.07906200  | C | -3.76868000 | 5.38928600 | 2.13843900  |
| C  | -6.26027700 | 6.54781200  | -0.71059600 | C | -4.63598600 | 6.07215500 | 1.19689900  |
| H  | -7.17787600 | 6.31471700  | -0.15997800 | C | -4.30546100 | 5.58371300 | -0.15102700 |
| H  | -6.18567500 | 7.64070400  | -0.78546800 | C | -3.36864300 | 4.55195100 | -0.02622400 |
| H  | -6.36875000 | 6.14793100  | -1.72154100 | C | -2.73897200 | 3.73951000 | -1.11801200 |
| C  | -3.93747300 | 4.65684600  | -1.97199400 | H | -3.20806700 | 3.93852300 | -2.08474600 |
| H  | -3.12684600 | 5.17157700  | -2.50540400 | H | -1.67042000 | 3.97869500 | -1.20881100 |
| H  | -3.71246900 | 3.58548300  | -1.98755300 | H | -2.82298000 | 2.66585400 | -0.92319000 |
| H  | -4.85937500 | 4.81154100  | -2.53864700 | C | -2.10131100 | 3.37766300 | 1.93939800  |
| Rh | -5.09479700 | 4.04332300  | 1.20623600  | H | -2.24658600 | 2.40074700 | 1.46857800  |
| C  | -5.71233200 | -1.43356200 | 4.47986300  | H | -1.07270000 | 3.69980800 | 1.72606200  |
| C  | -6.41528200 | -2.51791400 | 3.69404000  | H | -2.19519700 | 3.25198700 | 3.02109800  |
| H  | -7.40884900 | -2.70338700 | 4.10694400  | C | -3.61409000 | 5.71729300 | 3.59338300  |
| H  | -6.47701100 | -2.24562100 | 2.63720200  | H | -3.19282200 | 4.87737400 | 4.15222900  |
| H  | -5.82442300 | -3.43889800 | 3.76489200  | H | -2.94111600 | 6.57604600 | 3.71991400  |
| C  | -7.71825100 | 1.14652500  | 0.09292600  | H | -4.57308300 | 5.96987600 | 4.05300900  |
| H  | -8.60697800 | 1.58781100  | -0.36530200 | C | -5.46907200 | 7.28844100 | 1.46449500  |
| H  | -8.02883700 | 0.62568700  | 1.00650600  | H | -5.60508700 | 7.45256500 | 2.53697000  |
| H  | -7.26253500 | 0.41665600  | -0.58012200 | H | -4.97861300 | 8.18263500 | 1.05412000  |

|              |             |             |             |    |             |             |             |
|--------------|-------------|-------------|-------------|----|-------------|-------------|-------------|
| H            | -6.45131400 | 7.17721700  | 0.99770900  | C  | -2.14293100 | 3.67853500  | 0.09985000  |
| C            | -4.92238300 | 6.12630800  | -1.40337400 | H  | -2.53053400 | 2.97047700  | -0.63804800 |
| H            | -4.48818200 | 7.10704300  | -1.64322200 | H  | -1.27142800 | 4.18357100  | -0.34073600 |
| H            | -4.75342600 | 5.46680900  | -2.25849000 | H  | -1.81311600 | 3.09878800  | 0.96100500  |
| H            | -5.99949700 | 6.25618000  | -1.26945100 | C  | -2.77713500 | 4.81299900  | 3.04914000  |
| Rh           | -5.27790000 | 4.01160200  | 1.26779100  | H  | -2.47674700 | 3.76280200  | 3.02646900  |
| C            | -6.66170500 | 0.29377200  | -1.32397000 | H  | -1.87463000 | 5.42029600  | 3.20264100  |
| C            | -7.96562400 | -0.44644200 | -1.42598400 | H  | -3.42786400 | 4.95842200  | 3.91556500  |
| H            | -8.21128200 | -0.59975900 | -2.47717200 | C  | -5.02769400 | 7.10083900  | 2.70714000  |
| H            | -7.89756300 | -1.40652900 | -0.90498900 | H  | -5.06756200 | 6.58272700  | 3.66917200  |
| H            | -8.75383600 | 0.13804400  | -0.93972100 | H  | -4.39656900 | 7.99210000  | 2.83169800  |
| C            | -9.09792600 | 3.76876400  | -0.85272000 | H  | -6.04007900 | 7.44479000  | 2.47276000  |
| H            | -9.59926200 | 3.04632800  | -0.19853000 | C  | -5.69345400 | 7.38871900  | -0.37564500 |
| H            | -8.74879700 | 3.22627500  | -1.73846400 | H  | -6.68107900 | 7.27479800  | 0.08405600  |
| H            | -9.80809200 | 4.54198300  | -1.15238700 | H  | -5.35469100 | 8.41593500  | -0.18738400 |
| C            | -7.91206600 | 4.39723700  | -0.11904000 | H  | -5.81357100 | 7.26577400  | -1.45458700 |
| O            | -7.87008700 | 5.61088400  | 0.09297700  | C  | -3.84048900 | 5.26913200  | -1.99685400 |
| O            | -7.01163700 | 3.51858200  | 0.22021100  | H  | -2.87207800 | 5.61468000  | -2.38340900 |
| O            | -6.00301300 | 0.75138900  | -2.20911700 | H  | -3.93747800 | 4.20966400  | -2.25616800 |
| O            | -6.33172800 | 0.42431500  | 0.04101900  | H  | -4.62372700 | 5.81480000  | -2.52964300 |
| C            | -7.79281900 | 4.46234300  | 4.77262400  | Rh | -5.33455100 | 4.32655300  | 0.96931500  |
| C            | -7.93453100 | 3.17282000  | 5.25889200  | C  | -8.54639300 | 2.50437800  | -0.73001300 |
| C            | -7.33487100 | 2.09073000  | 4.58566800  | H  | -8.25378300 | 1.78223500  | -1.49545800 |
| C            | -6.57347600 | 2.37145100  | 3.40051800  | H  | -9.23225000 | 3.24676100  | -1.14657200 |
| C            | -6.40150600 | 3.70909800  | 2.93699200  | H  | -9.07255400 | 1.96920600  | 0.06940700  |
| C            | -7.03471800 | 4.73907600  | 3.62343300  | C  | -7.32873700 | 3.17939300  | -0.15010800 |
| H            | -8.28627400 | 5.27944200  | 5.29509300  | O  | -7.44025200 | 4.31995300  | 0.41772800  |
| H            | -8.51669600 | 2.97921100  | 6.15655100  | O  | -6.19307400 | 2.61957100  | -0.18190600 |
| H            | -7.19874400 | 0.04970400  | 4.48618100  | C  | -7.49769400 | 3.50728100  | 4.57828800  |
| H            | -6.97982800 | 5.75777600  | 3.25784200  | C  | -7.08071600 | 2.26800400  | 5.05206200  |
| C            | -6.05189800 | 1.25714000  | 2.64658300  | C  | -6.09631900 | 1.57906100  | 4.34217500  |
| N            | -7.46505700 | 0.82235800  | 5.08286900  | C  | -5.51497000 | 2.12959900  | 3.17519500  |
| H            | -8.18217200 | 0.65722300  | 5.77351200  | C  | -5.94825200 | 3.38851200  | 2.68691900  |
| C            | -5.12695600 | 0.92046900  | 0.40866900  | C  | -6.94910600 | 4.05095400  | 3.41297600  |
| O            | -5.24927900 | 1.70039700  | 1.53793500  | H  | -8.27004200 | 4.05180700  | 5.11663800  |
| O            | -6.15809000 | 0.06112600  | 2.82353900  | H  | -7.51258300 | 1.83283400  | 5.94955600  |
| O            | -4.07542300 | 0.76638600  | -0.13823600 | H  | -7.32917400 | 5.00108500  | 3.05223900  |
|              |             |             |             | C  | -4.44993000 | 1.35742400  | 2.52174600  |
| <b>INT22</b> |             |             |             | N  | -5.67476100 | 0.32716600  | 4.78533600  |
| C            | -3.46059000 | 5.20856500  | 1.77419500  | H  | -6.10168600 | -0.08314800 | 5.60512400  |
| C            | -4.48845100 | 6.21109300  | 1.62626500  | C  | -4.75350200 | -0.47323300 | 4.15675200  |
| C            | -4.71833500 | 6.40131600  | 0.19040900  | O  | -4.17904900 | 0.08024000  | 3.04387600  |
| C            | -3.92960700 | 5.47451300  | -0.51330100 | O  | -3.76005600 | 1.69350600  | 1.59178500  |
| C            | -3.17507400 | 4.69780500  | 0.46857900  | O  | -4.44276100 | -1.57659700 | 4.53518500  |



**INT23**

|    |             |             |             |             |              |             |             |
|----|-------------|-------------|-------------|-------------|--------------|-------------|-------------|
|    |             |             |             | C           | -7.84444000  | 3.26747300  | 3.70068500  |
|    |             |             |             | C           | -8.39254800  | 2.30559100  | 3.11026700  |
| C  | -4.85204500 | 3.12863500  | 0.62269700  | C           | -7.67142300  | 4.30542000  | 4.68667600  |
| C  | -5.82984900 | 4.14397400  | 0.88964800  | C           | -7.39003000  | 3.96152800  | 6.02390200  |
| C  | -7.11405400 | 3.63605300  | 0.45175800  | C           | -7.85377300  | 5.66165000  | 4.35627800  |
| C  | -6.93801700 | 2.32658800  | -0.07963900 | C           | -7.28074500  | 4.95426800  | 6.99419400  |
| C  | -5.53928700 | 2.00487500  | 0.04838500  | H           | -7.27447700  | 2.91455300  | 6.27954400  |
| C  | -4.86603400 | 0.77788000  | -0.48375000 | C           | -7.74308500  | 6.64952000  | 5.33373400  |
| H  | -5.56504100 | -0.05321400 | -0.57016700 | H           | -8.10837400  | 5.93141000  | 3.33626400  |
| H  | -4.44213700 | 0.99413600  | -1.47498500 | C           | -7.45060900  | 6.29933200  | 6.65355300  |
| H  | -4.04312300 | 0.46238000  | 0.16438100  | H           | -7.06685100  | 4.67640500  | 8.02264700  |
| C  | -3.36115000 | 3.25315900  | 0.73520900  | H           | -7.89290600  | 7.69191100  | 5.06564600  |
| H  | -2.89367100 | 2.27804100  | 0.89564000  | H           | -7.36416600  | 7.06967500  | 7.41500100  |
| H  | -2.94149800 | 3.67377100  | -0.18945200 | C           | -9.62443200  | 1.58025900  | 2.86627600  |
| H  | -3.06110900 | 3.89885800  | 1.56307000  | C           | -10.80950800 | 2.14088800  | 3.39293600  |
| C  | -5.55768400 | 5.57488100  | 1.26442300  | C           | -9.69915000  | 0.37618200  | 2.15104100  |
| H  | -4.49259600 | 5.74452800  | 1.44233000  | C           | -12.03309300 | 1.50539800  | 3.21006400  |
| H  | -5.85780300 | 6.24362800  | 0.44683200  | H           | -10.75502100 | 3.07191000  | 3.94973100  |
| H  | -6.10041200 | 5.88936800  | 2.16142500  | C           | -10.93254100 | -0.25362700 | 1.97508400  |
| C  | -8.39228400 | 4.41855600  | 0.43502700  | H           | -8.79729400  | -0.06435500 | 1.74059000  |
| H  | -8.36173000 | 5.25834100  | 1.13357000  | C           | -12.09962600 | 0.30310100  | 2.49870300  |
| H  | -8.56527000 | 4.82886300  | -0.56940200 | H           | -12.93533400 | 1.94747100  | 3.62460700  |
| H  | -9.25354600 | 3.79556500  | 0.69134900  | H           | -10.97427800 | -1.18943000 | 1.42421400  |
| C  | -7.97209000 | 1.50806200  | -0.79432700 | H           | -13.05572100 | -0.19384800 | 2.35663800  |
| H  | -7.90201500 | 1.66924000  | -1.87969300 | C           | -6.27900800  | -0.79417900 | 2.04789900  |
| H  | -7.83417200 | 0.44694800  | -0.58253400 | C           | -5.69244700  | -2.06026300 | 2.67177900  |
| H  | -8.98363500 | 1.78361200  | -0.48380500 | H           | -5.90987500  | -2.92155800 | 2.03685300  |
| Rh | -6.35381200 | 2.32288700  | 2.21723800  | H           | -4.61163800  | -1.95844400 | 2.81111300  |
| C  | -3.24158100 | 3.80866000  | 4.87151800  | H           | -6.13213300  | -2.21630800 | 3.66259600  |
| C  | -2.97097400 | 2.78242400  | 5.76530000  | O           | -7.03395900  | -0.86748800 | 1.07155300  |
| C  | -3.82092500 | 1.67370900  | 5.77208800  | O           | -5.89307900  | 0.28468500  | 2.66028000  |
| C  | -4.93375400 | 1.59427700  | 4.90551300  |             |              |             |             |
| C  | -5.12127700 | 2.57245200  | 3.89667400  | <b>TS12</b> |              |             |             |
| C  | -4.28780900 | 3.69642900  | 3.94852900  | C           | -4.79754400  | 3.04843400  | 0.47675500  |
| H  | -2.61661900 | 4.69865600  | 4.86862100  | C           | -5.84031400  | 4.02092000  | 0.67105500  |
| H  | -2.13135800 | 2.83506700  | 6.45333900  | C           | -7.09298500  | 3.44137200  | 0.24357200  |
| H  | -4.44253200 | 4.51655000  | 3.26193400  | C           | -6.84326000  | 2.10631000  | -0.17978300 |
| C  | -5.90188400 | 0.53248600  | 5.24989200  | C           | -5.41749900  | 1.85849600  | -0.00365100 |
| N  | -3.58031500 | 0.61897300  | 6.65773600  | C           | -4.71309400  | 0.59817600  | -0.40376800 |
| H  | -2.73530100 | 0.62864900  | 7.21321200  | H           | -5.38089400  | -0.26178700 | -0.33445900 |
| C  | -4.20144600 | -0.60934700 | 6.59468200  | H           | -4.36168600  | 0.68137500  | -1.44192200 |
| O  | -5.34544300 | -0.62042400 | 5.84872100  | H           | -3.84227100  | 0.40637200  | 0.22917800  |
| O  | -7.10046700 | 0.56640000  | 5.17642700  | C           | -3.32829300  | 3.27073100  | 0.68546900  |
| O  | -3.81357200 | -1.59592600 | 7.17254600  | H           | -2.78982200  | 2.32087100  | 0.74148600  |

|    |             |             |             |              |              |             |            |
|----|-------------|-------------|-------------|--------------|--------------|-------------|------------|
| H  | -2.89464900 | 3.84795400  | -0.14301700 | C            | -9.47792000  | 1.84010300  | 2.89568700 |
| H  | -3.12650800 | 3.81688100  | 1.61263500  | C            | -10.54297200 | 2.57616900  | 3.45671000 |
| C  | -5.63692000 | 5.47748900  | 0.97562700  | C            | -9.76650100  | 0.70962500  | 2.11287300 |
| H  | -4.65529800 | 5.67071100  | 1.41486600  | C            | -11.86166400 | 2.19129900  | 3.23201700 |
| H  | -5.69514600 | 6.06104700  | 0.04614200  | H            | -10.32653900 | 3.44814300  | 4.06678400 |
| H  | -6.40080500 | 5.87567000  | 1.65076800  | C            | -11.09226200 | 0.32860900  | 1.89962100 |
| C  | -8.40268300 | 4.16922200  | 0.16205600  | H            | -8.94813500  | 0.12747100  | 1.70003200 |
| H  | -8.48035000 | 4.94989800  | 0.92474600  | C            | -12.14166500 | 1.06571100  | 2.45089600 |
| H  | -8.51259400 | 4.65413400  | -0.81789000 | H            | -12.67213800 | 2.76920400  | 3.66871900 |
| H  | -9.24826600 | 3.48987600  | 0.29497800  | H            | -11.30210000 | -0.55406400 | 1.30121000 |
| C  | -7.80653900 | 1.20429300  | -0.89170400 | H            | -13.17189100 | 0.76536200  | 2.27809200 |
| H  | -7.67899600 | 1.30342800  | -1.97958400 | C            | -6.33764400  | -0.83975300 | 2.19267400 |
| H  | -7.64988700 | 0.16376700  | -0.60617800 | C            | -5.79750900  | -2.09636600 | 2.87143100 |
| H  | -8.84236300 | 1.46185800  | -0.65464500 | H            | -6.05326000  | -2.97641900 | 2.27765600 |
| Rh | -6.33792100 | 2.23377100  | 2.06296000  | H            | -4.71417100  | -2.03478000 | 3.01060700 |
| C  | -3.47754800 | 4.07720100  | 4.68815400  | H            | -6.24719700  | -2.18839000 | 3.86597600 |
| C  | -2.98866400 | 3.05412800  | 5.48985100  | O            | -7.15958000  | -0.92759800 | 1.27424600 |
| C  | -3.72522600 | 1.86869700  | 5.58213700  | O            | -5.84668700  | 0.25765600  | 2.69035700 |
| C  | -4.94188900 | 1.69722200  | 4.88685000  |              |              |             |            |
| C  | -5.36102400 | 2.69212600  | 3.96431100  | <b>INT24</b> |              |             |            |
| C  | -4.64233300 | 3.89697800  | 3.94002100  | C            | -0.85882300  | 3.06979500  | 6.75759600 |
| H  | -2.93879200 | 5.01960400  | 4.62803700  | C            | -1.61184500  | 4.28255100  | 6.41678800 |
| H  | -2.06542700 | 3.16783900  | 6.05137300  | C            | -1.01351500  | 4.87611400  | 5.25777200 |
| H  | -4.99772700 | 4.71508400  | 3.32841700  | C            | -0.01740700  | 3.95772200  | 4.77849300 |
| C  | -5.73907000 | 0.52039000  | 5.29251400  | C            | 0.10960100   | 2.87558200  | 5.76553500 |
| N  | -3.25418200 | 0.82880800  | 6.38457500  | C            | 1.07753200   | 1.73987500  | 5.62692400 |
| H  | -2.34555200 | 0.91551900  | 6.81997600  | H            | 0.92464800   | 1.21369700  | 4.67796800 |
| C  | -3.76604000 | -0.45043400 | 6.38912400  | H            | 2.11167000   | 2.10720000  | 5.64086300 |
| O  | -4.99539800 | -0.56405200 | 5.80720200  | H            | 0.96730900   | 1.01061300  | 6.43334400 |
| O  | -6.93416200 | 0.40474500  | 5.33096600  | C            | -1.16732700  | 2.20108600  | 7.94100000 |
| O  | -3.21331500 | -1.39817600 | 6.89173900  | H            | -0.53288700  | 1.31132500  | 7.96523400 |
| C  | -7.44939600 | 3.02039700  | 3.95571800  | H            | -1.01352600  | 2.74711700  | 8.88099000 |
| C  | -8.11100000 | 2.27310500  | 3.14941800  | H            | -2.21017200  | 1.86440900  | 7.92009100 |
| C  | -7.57299900 | 4.01117200  | 5.02203900  | C            | -2.64154300  | 4.88830900  | 7.32101400 |
| C  | -7.61630800 | 3.59073200  | 6.36351700  | H            | -3.39051700  | 4.15031900  | 7.62376500 |
| C  | -7.71746000 | 5.37848100  | 4.72856600  | H            | -2.16256000  | 5.27102300  | 8.23345900 |
| C  | -7.80367200 | 4.52262100  | 7.38309200  | H            | -3.16417800  | 5.71910000  | 6.84474400 |
| H  | -7.51888400 | 2.53333600  | 6.58418700  | C            | -1.29768300  | 6.23492300  | 4.69315000 |
| C  | -7.89310400 | 6.30642100  | 5.75426800  | H            | -2.30618700  | 6.57610400  | 4.94146100 |
| H  | -7.70052900 | 5.70585600  | 3.69295600  | H            | -0.58882900  | 6.96770400  | 5.10299400 |
| C  | -7.93542400 | 5.88117000  | 7.08412700  | H            | -1.19665200  | 6.24623500  | 3.60522900 |
| H  | -7.84655400 | 4.18577800  | 8.41537300  | C            | 0.94094300   | 4.18926300  | 3.64910000 |
| H  | -8.00468800 | 7.36054600  | 5.51444700  | H            | 1.85180300   | 4.68459200  | 4.01580300 |
| H  | -8.07559600 | 6.60433500  | 7.88297000  | H            | 1.24019200   | 3.24684800  | 3.18200700 |

|    |             |             |             |              |             |             |             |
|----|-------------|-------------|-------------|--------------|-------------|-------------|-------------|
| H  | 0.50405800  | 4.81660600  | 2.86897100  | H            | -2.66574300 | -1.50198200 | 3.84468300  |
| Rh | -1.95555000 | 2.93067900  | 4.68566200  | H            | -3.94562300 | -1.17888000 | 5.06120900  |
| C  | -6.13243100 | 5.06751000  | 6.02985400  | C            | -2.91092000 | 0.56774300  | 4.36240300  |
| C  | -7.03561000 | 4.06100500  | 6.34125300  | O            | -3.48716500 | 1.39029800  | 5.14381000  |
| C  | -7.04910400 | 2.90177200  | 5.55738200  | O            | -1.86225500 | 0.94787100  | 3.74267100  |
| C  | -6.18053400 | 2.75443000  | 4.45847300  |              |             |             |             |
| C  | -5.25133400 | 3.78081400  | 4.15056000  | <b>INT25</b> |             |             |             |
| C  | -5.25022300 | 4.92562300  | 4.95448200  | C            | -5.11814500 | 3.46170000  | 0.70499100  |
| H  | -6.11703500 | 5.97572900  | 6.62673900  | C            | -6.39514300 | 4.13175900  | 0.73540900  |
| H  | -7.72325900 | 4.16139100  | 7.17669100  | C            | -7.41181300 | 3.19282900  | 0.24797000  |
| H  | -4.55947600 | 5.72537500  | 4.71021900  | C            | -6.79482800 | 1.94308600  | 0.06924200  |
| C  | -6.24056300 | 1.50157500  | 3.69353400  | C            | -5.36908500 | 2.08531800  | 0.40252700  |
| N  | -7.93244400 | 1.87269600  | 5.86283200  | C            | -4.34607100 | 1.00480500  | 0.22592600  |
| H  | -8.55533300 | 1.96391100  | 6.65400900  | H            | -4.71331700 | 0.04214200  | 0.59350300  |
| C  | -8.00718100 | 0.66491000  | 5.20947300  | H            | -4.11018500 | 0.88033200  | -0.83952400 |
| O  | -7.15334000 | 0.53319100  | 4.14891500  | H            | -3.41356700 | 1.23758200  | 0.74612200  |
| O  | -5.59494500 | 1.19906900  | 2.72387900  | C            | -3.77750600 | 4.10656700  | 0.87311700  |
| O  | -8.75875700 | -0.22551600 | 5.52176800  | H            | -3.04546500 | 3.42695400  | 1.31470000  |
| C  | -4.35508300 | 3.76505600  | 2.94675300  | H            | -3.39925200 | 4.41358600  | -0.11121500 |
| C  | -3.01698000 | 3.57543000  | 3.02106300  | H            | -3.82913300 | 5.00199300  | 1.49638500  |
| C  | -5.08408900 | 4.06534300  | 1.66436200  | C            | -6.60667000 | 5.60514700  | 0.90568000  |
| C  | -5.99231400 | 5.13553600  | 1.58845600  | H            | -5.90110400 | 6.03848500  | 1.61935500  |
| C  | -4.90287000 | 3.27177000  | 0.51881400  | H            | -6.46477300 | 6.11917100  | -0.05491400 |
| C  | -6.67221400 | 5.42221100  | 0.40366600  | H            | -7.62057000 | 5.82677400  | 1.24818700  |
| H  | -6.16615600 | 5.75529900  | 2.46394200  | C            | -8.83442200 | 3.55468900  | -0.04519300 |
| C  | -5.58235100 | 3.55627400  | -0.66404300 | H            | -9.24341100 | 4.23893500  | 0.70328300  |
| H  | -4.23608700 | 2.41937500  | 0.56987400  | H            | -8.89402700 | 4.05996100  | -1.01860000 |
| C  | -6.46815800 | 4.63460600  | -0.72990700 | H            | -9.48135100 | 2.67632900  | -0.08419300 |
| H  | -7.36245700 | 6.26171500  | 0.36912000  | C            | -7.42777300 | 0.67205100  | -0.40692900 |
| H  | -5.42744900 | 2.92487000  | -1.53526400 | H            | -7.22431900 | 0.52560000  | -1.47612900 |
| H  | -6.99954200 | 4.85283000  | -1.65269300 | H            | -7.02758600 | -0.19646000 | 0.12430300  |
| C  | -2.12817400 | 3.80933000  | 1.85078600  | H            | -8.51099900 | 0.68195500  | -0.26868700 |
| C  | -2.03951900 | 5.09743800  | 1.28398300  | Rh           | -6.43298600 | 2.55606200  | 2.28819500  |
| C  | -1.32915300 | 2.79135500  | 1.29273100  | C            | -3.33118800 | 3.64791800  | 5.25630200  |
| C  | -1.18802000 | 5.35964900  | 0.20955600  | C            | -3.13063100 | 2.42716700  | 5.90420900  |
| H  | -2.66795000 | 5.89001600  | 1.67976500  | C            | -3.90000900 | 1.33667400  | 5.49899600  |
| C  | -0.48975200 | 3.05294800  | 0.21004400  | C            | -4.82700900 | 1.50435500  | 4.45537700  |
| H  | -1.38252700 | 1.79448100  | 1.71570600  | C            | -5.03351000 | 2.73142900  | 3.78772400  |
| C  | -0.40760300 | 4.33757300  | -0.33446900 | C            | -4.26710900 | 3.81197300  | 4.21987100  |
| H  | -1.14463500 | 6.36206700  | -0.20970400 | H            | -2.74174400 | 4.50465100  | 5.57233300  |
| H  | 0.10444300  | 2.24572600  | -0.21200200 | H            | -2.40171500 | 2.33254000  | 6.70322500  |
| H  | 0.25122500  | 4.53763000  | -1.17544900 | H            | -4.38995500 | 4.79808400  | 3.78431100  |
| C  | -3.46058200 | -0.81758300 | 4.15058000  | C            | -5.61491000 | 0.38697400  | 4.03860300  |
| H  | -4.21508700 | -0.77200200 | 3.35765200  | N            | -3.81132000 | 0.07062500  | 6.06827700  |

|             |              |             |             |    |              |             |             |
|-------------|--------------|-------------|-------------|----|--------------|-------------|-------------|
| H           | -3.15958400  | -0.10570800 | 6.82377500  | C  | -6.30669200  | 5.48394500  | 0.81428600  |
| C           | -4.55454400  | -1.02848700 | 5.70020200  | H  | -5.61876200  | 5.85597900  | 1.57865600  |
| O           | -5.46765100  | -0.80692300 | 4.64985000  | H  | -6.08586800  | 6.02511600  | -0.11601500 |
| O           | -6.44487200  | 0.47248800  | 3.11668400  | H  | -7.32489800  | 5.74624800  | 1.11224300  |
| O           | -4.48145800  | -2.11695400 | 6.19081700  | C  | -8.59732900  | 3.50716100  | -0.23086000 |
| C           | -7.83152100  | 3.59130500  | 4.00689700  | H  | -8.96870100  | 4.27427400  | 0.45395400  |
| C           | -8.45703800  | 2.71254800  | 3.38603400  | H  | -8.65873100  | 3.91533500  | -1.24834500 |
| C           | -7.42952000  | 4.55274200  | 4.99550900  | H  | -9.27590600  | 2.65353800  | -0.16940400 |
| C           | -7.19434600  | 4.13335500  | 6.31998700  | C  | -7.23308600  | 0.60352700  | -0.62486900 |
| C           | -7.33016200  | 5.92090700  | 4.67856300  | H  | -6.95929500  | 0.46830500  | -1.67995400 |
| C           | -6.86908700  | 5.06622500  | 7.30097900  | H  | -6.90410200  | -0.29006200 | -0.08598900 |
| H           | -7.28039400  | 3.08029000  | 6.56818700  | H  | -8.32267100  | 0.65421600  | -0.56970700 |
| C           | -7.00355700  | 6.84692100  | 5.66648700  | Rh | -6.37150700  | 2.42177100  | 2.08831000  |
| H           | -7.52641200  | 6.25167100  | 3.66417700  | C  | -3.46182200  | 3.67026800  | 5.20582000  |
| C           | -6.77066900  | 6.42252500  | 6.97748000  | C  | -3.17604300  | 2.43921300  | 5.79866300  |
| H           | -6.69903200  | 4.73587600  | 8.32143700  | C  | -3.96660700  | 1.33842600  | 5.45362900  |
| H           | -6.93909100  | 7.90169800  | 5.41588100  | C  | -5.00302500  | 1.49610900  | 4.51888300  |
| H           | -6.52066800  | 7.14759500  | 7.74639800  | C  | -5.34827300  | 2.75825400  | 3.96350600  |
| C           | -9.63232800  | 1.98386400  | 2.96389400  | C  | -4.53704200  | 3.84275700  | 4.32462000  |
| C           | -10.84941500 | 2.68955900  | 2.86063500  | H  | -2.84394800  | 4.52745600  | 5.45852400  |
| C           | -9.60960600  | 0.60357100  | 2.69159000  | H  | -2.35627500  | 2.33648700  | 6.50293300  |
| C           | -12.01552500 | 2.02375300  | 2.49165400  | H  | -4.76890600  | 4.83955700  | 3.96312500  |
| H           | -10.87108500 | 3.75252500  | 3.08117100  | C  | -5.65501100  | 0.31803000  | 4.01738100  |
| C           | -10.78363100 | -0.05178700 | 2.32389200  | N  | -3.76385600  | 0.06509300  | 5.97128900  |
| H           | -8.67861400  | 0.05657400  | 2.78322000  | H  | -3.05267500  | -0.09228100 | 6.67551500  |
| C           | -11.98571000 | 0.65315900  | 2.22000000  | C  | -4.50932700  | -1.05301000 | 5.66171100  |
| H           | -12.94850400 | 2.57499400  | 2.41990700  | O  | -5.45110400  | -0.86764600 | 4.63709500  |
| H           | -10.76052400 | -1.11933800 | 2.12523400  | O  | -6.37714000  | 0.33433700  | 3.01340500  |
| H           | -12.89699400 | 0.13604200  | 1.93437800  | O  | -4.39027700  | -2.12951900 | 6.16846400  |
|             |              |             |             | C  | -7.25458300  | 3.22630200  | 4.09459600  |
| <b>TS13</b> |              |             |             | C  | -8.03530500  | 2.56834600  | 3.29364100  |
| C           | -4.87629600  | 3.29926800  | 0.56566100  | C  | -7.36583200  | 4.32868400  | 5.05709800  |
| C           | -6.15196800  | 4.00958800  | 0.59333200  | C  | -6.92723200  | 4.18640400  | 6.38549400  |
| C           | -7.18273900  | 3.12001300  | 0.07944000  | C  | -8.00092600  | 5.52260500  | 4.66918800  |
| C           | -6.58878800  | 1.84408200  | -0.08494700 | C  | -7.13435800  | 5.21035200  | 7.30595200  |
| C           | -5.14733800  | 1.96216500  | 0.21216000  | H  | -6.44223500  | 3.26586100  | 6.69470600  |
| C           | -4.16837400  | 0.83790400  | 0.05903600  | C  | -8.19279400  | 6.55107400  | 5.59175000  |
| H           | -4.55882000  | -0.09299900 | 0.48192600  | H  | -8.34462500  | 5.63490300  | 3.64526500  |
| H           | -3.96678800  | 0.65279100  | -1.00441700 | C  | -7.76174300  | 6.39612900  | 6.91079800  |
| H           | -3.21407000  | 1.05858100  | 0.54340000  | H  | -6.80966400  | 5.08372800  | 8.33451300  |
| C           | -3.54191100  | 3.91334700  | 0.85819700  | H  | -8.68167300  | 7.46972600  | 5.28093200  |
| H           | -2.78259600  | 3.15490400  | 1.06293900  | H  | -7.91633200  | 7.19463700  | 7.63042700  |
| H           | -3.20015100  | 4.50356200  | -0.00202000 | C  | -9.41191600  | 2.14766700  | 3.10905600  |
| H           | -3.58394400  | 4.58546400  | 1.72035400  | C  | -10.45824400 | 2.84432400  | 3.74853000  |

|              |              |             |             |              |              |             |             |
|--------------|--------------|-------------|-------------|--------------|--------------|-------------|-------------|
| C            | -9.72223400  | 1.03044800  | 2.31200900  | H            | -2.29572300  | 1.77137600  | 6.84260400  |
| C            | -11.77835400 | 2.43612300  | 3.57671000  | H            | -4.90992900  | 4.74125300  | 5.17475600  |
| H            | -10.23046000 | 3.70247500  | 4.37256700  | C            | -5.48542200  | 0.30257000  | 3.93368800  |
| C            | -11.04494000 | 0.62313200  | 2.15215400  | N            | -3.59475000  | -0.30678900 | 5.77204200  |
| H            | -8.91451900  | 0.47174200  | 1.85160700  | H            | -2.86215400  | -0.57164400 | 6.41955000  |
| C            | -12.07612200 | 1.32781400  | 2.77844500  | C            | -4.29067000  | -1.36346800 | 5.23468400  |
| H            | -12.57710300 | 2.98235300  | 4.06996300  | O            | -5.22812900  | -0.98677800 | 4.27028400  |
| H            | -11.27133900 | -0.24912600 | 1.54579900  | O            | -6.07940900  | 0.46295900  | 2.86028700  |
| H            | -13.10714800 | 1.01127500  | 2.65112700  | O            | -4.12395300  | -2.52003400 | 5.49181400  |
|              |              |             |             | C            | -6.82447800  | 3.15002000  | 4.21445100  |
| <b>INT26</b> |              |             |             | C            | -7.72537600  | 2.52014800  | 3.34622900  |
| C            | -4.89131500  | 3.33549400  | 0.38900100  | C            | -7.36067000  | 4.40003000  | 4.86796500  |
| C            | -6.19438500  | 4.00343900  | 0.38925600  | C            | -7.37841500  | 4.52479500  | 6.27070200  |
| C            | -7.18758900  | 3.08319100  | -0.10913800 | C            | -7.92258800  | 5.42720000  | 4.09560500  |
| C            | -6.54720100  | 1.80926000  | -0.22583600 | C            | -7.94713500  | 5.64370400  | 6.87526700  |
| C            | -5.11083100  | 1.99203700  | 0.04679400  | H            | -6.95406200  | 3.73840200  | 6.88808500  |
| C            | -4.09799300  | 0.89150600  | -0.05347100 | C            | -8.48237800  | 6.55268500  | 4.70256600  |
| H            | -4.44331800  | -0.01793100 | 0.44900900  | H            | -7.91800800  | 5.34107800  | 3.01420500  |
| H            | -3.91940400  | 0.63395800  | -1.10553000 | C            | -8.49876700  | 6.66322100  | 6.09317100  |
| H            | -3.13890900  | 1.17908000  | 0.38417100  | H            | -7.96155100  | 5.71939500  | 7.95874300  |
| C            | -3.59201400  | 4.00377600  | 0.72616800  | H            | -8.90558800  | 7.34191900  | 4.08780800  |
| H            | -2.81027000  | 3.27694200  | 0.96037000  | H            | -8.93694400  | 7.53675700  | 6.56668200  |
| H            | -3.23842000  | 4.60925000  | -0.11902200 | C            | -9.13636100  | 2.26361900  | 3.45100500  |
| H            | -3.69491000  | 4.67431200  | 1.58563100  | C            | -9.82144200  | 2.34183500  | 4.69139600  |
| C            | -6.38495500  | 5.47922500  | 0.57272200  | C            | -9.85384200  | 1.80058400  | 2.32354400  |
| H            | -5.80244500  | 5.86668800  | 1.41376500  | C            | -11.16450500 | 2.00409000  | 4.78028600  |
| H            | -6.04881900  | 6.01009700  | -0.32857500 | H            | -9.29168400  | 2.67800200  | 5.57496000  |
| H            | -7.43476900  | 5.73729700  | 0.73218400  | C            | -11.19886800 | 1.46592800  | 2.41639500  |
| C            | -8.57561600  | 3.45268300  | -0.54279800 | H            | -9.32272900  | 1.68533500  | 1.38718400  |
| H            | -9.07600200  | 4.10812400  | 0.17558000  | C            | -11.86009900 | 1.57200500  | 3.64418100  |
| H            | -8.53103700  | 3.98819900  | -1.50065600 | H            | -11.67523700 | 2.07253900  | 5.73608000  |
| H            | -9.20563600  | 2.57342300  | -0.69446300 | H            | -11.73265400 | 1.11026800  | 1.54018000  |
| C            | -7.15079400  | 0.53593400  | -0.73332500 | H            | -12.91057100 | 1.30670000  | 3.72006700  |
| H            | -6.92132300  | 0.40537300  | -1.79990900 |              |              |             |             |
| H            | -6.75276200  | -0.33428300 | -0.20361700 | <b>INT27</b> |              |             |             |
| H            | -8.23842100  | 0.52694400  | -0.62569000 | C            | -5.39534000  | 3.80571200  | 0.51953000  |
| Rh           | -6.37572300  | 2.42368800  | 1.92260800  | C            | -6.74355000  | 4.28655500  | 0.60987400  |
| C            | -3.50420300  | 3.35682100  | 5.99657900  | C            | -7.64197900  | 3.22538800  | 0.15097000  |
| C            | -3.14860100  | 2.03050400  | 6.22337100  | C            | -6.86433700  | 2.07851800  | -0.08676700 |
| C            | -3.90929700  | 1.03710500  | 5.60541000  | C            | -5.46246300  | 2.40773600  | 0.19996800  |
| C            | -5.00192200  | 1.36582200  | 4.77104700  | C            | -4.30109600  | 1.49145900  | -0.04797000 |
| C            | -5.46684600  | 2.72211700  | 4.66293100  | H            | -4.54229000  | 0.46225200  | 0.23278900  |
| C            | -4.63729600  | 3.69702400  | 5.25722000  | H            | -4.02811300  | 1.49080300  | -1.11235600 |
| H            | -2.90343000  | 4.14952800  | 6.43260400  | H            | -3.42156100  | 1.79650900  | 0.52481100  |

|    |             |             |             |             |              |             |             |
|----|-------------|-------------|-------------|-------------|--------------|-------------|-------------|
| C  | -4.14793800 | 4.62604400  | 0.63990300  | H           | -7.67946200  | 7.97327000  | 5.40406300  |
| H  | -3.33349400 | 4.06590300  | 1.10411600  | H           | -6.29880900  | 7.42725500  | 7.40003100  |
| H  | -3.81895800 | 4.93932100  | -0.36059200 | C           | -9.55186600  | 1.93756600  | 3.14861600  |
| H  | -4.31141800 | 5.53110500  | 1.23026300  | C           | -10.79490300 | 2.60184300  | 3.19900300  |
| C  | -7.15527000 | 5.70788600  | 0.85604200  | C           | -9.52077000  | 0.55814300  | 2.87416600  |
| H  | -6.49168800 | 6.20461900  | 1.56898700  | C           | -11.97752100 | 1.89969900  | 2.97908100  |
| H  | -7.13120400 | 6.28275900  | -0.08025200 | H           | -10.82093900 | 3.66467400  | 3.42118100  |
| H  | -8.17424500 | 5.76561100  | 1.24852100  | C           | -10.71134300 | -0.13392600 | 2.65721700  |
| C  | -9.11925800 | 3.38579000  | -0.04780100 | H           | -8.56521300  | 0.04797400  | 2.84408900  |
| H  | -9.58307700 | 3.93264900  | 0.77852900  | C           | -11.93975200 | 0.52996900  | 2.70552000  |
| H  | -9.32246000 | 3.94793000  | -0.96943900 | H           | -12.92897400 | 2.42253100  | 3.02449800  |
| H  | -9.62542000 | 2.42094900  | -0.12425800 | H           | -10.67737000 | -1.20095700 | 2.45529400  |
| C  | -7.32769400 | 0.72143100  | -0.52154400 | H           | -12.86310200 | -0.01704700 | 2.53611000  |
| H  | -6.96875300 | 0.49667300  | -1.53440900 | C           | -0.56582500  | -0.05926600 | 7.69205400  |
| H  | -6.93853600 | -0.05227800 | 0.14891300  | C           | 0.42315200   | -0.69429600 | 8.65002900  |
| H  | -8.41755700 | 0.64548600  | -0.52403600 | H           | 1.10826300   | 0.06365500  | 9.03243500  |
| Rh | -6.47571700 | 2.64650600  | 2.14043800  | H           | -0.11223800  | -1.16745700 | 9.48015400  |
| C  | -3.03637000 | 3.54687600  | 4.76304700  | H           | 0.98561500   | -1.48239200 | 8.13797200  |
| C  | -2.76565900 | 2.29575100  | 5.29246300  | O           | -0.56222700  | 1.13058700  | 7.41633500  |
| C  | -3.58005700 | 1.19733800  | 4.92097800  | O           | -1.41784400  | -0.95545100 | 7.20478500  |
| C  | -4.63145700 | 1.46301300  | 4.00840100  |             |              |             |             |
| C  | -4.90376800 | 2.73729300  | 3.46689900  | <b>TS14</b> |              |             |             |
| C  | -4.10004900 | 3.79353000  | 3.85703700  | C           | -5.10550800  | 3.39656500  | 0.21403200  |
| H  | -2.40782300 | 4.38444900  | 5.05993400  | C           | -6.35081500  | 4.13204200  | 0.39781000  |
| H  | -1.94920000 | 2.13022200  | 5.98955100  | C           | -7.44903500  | 3.27247700  | -0.00197200 |
| H  | -4.27235300 | 4.80691000  | 3.50856800  | C           | -6.90977000  | 1.98346200  | -0.24718900 |
| C  | -5.46659300 | 0.38677200  | 3.60465800  | C           | -5.44414200  | 2.07047000  | -0.12415800 |
| N  | -3.35947600 | -0.05415500 | 5.41974900  | C           | -4.51786000  | 0.91801700  | -0.37165200 |
| H  | -2.07787200 | -0.53477700 | 6.56965200  | H           | -4.84186100  | 0.02911300  | 0.17965800  |
| C  | -4.11284900 | -1.09565700 | 5.07852000  | H           | -4.50051400  | 0.65822300  | -1.43850900 |
| O  | -5.26972800 | -0.81567100 | 4.07023200  | H           | -3.49459900  | 1.14678100  | -0.06447000 |
| O  | -6.41575800 | 0.59058700  | 2.77548600  | C           | -3.73466700  | 3.98022500  | 0.38060100  |
| O  | -4.08502400 | -2.25146900 | 5.39720700  | H           | -2.95912600  | 3.21393700  | 0.30812300  |
| C  | -7.67985800 | 3.59446800  | 3.96632900  | H           | -3.53852400  | 4.72885300  | -0.39825800 |
| C  | -8.35702100 | 2.70929500  | 3.40977800  | H           | -3.61986000  | 4.47136300  | 1.35274800  |
| C  | -7.26081600 | 4.62774300  | 4.87362200  | C           | -6.43990000  | 5.60653200  | 0.66197500  |
| C  | -6.47741900 | 4.32736900  | 6.00438500  | H           | -5.64514800  | 5.94016000  | 1.33519600  |
| C  | -7.68702200 | 5.95457100  | 4.66559500  | H           | -6.33655800  | 6.17184700  | -0.27497400 |
| C  | -6.14028700 | 5.33346500  | 6.90666500  | H           | -7.39960700  | 5.88281900  | 1.10770300  |
| H  | -6.14066300 | 3.30954700  | 6.16544000  | C           | -8.88643300  | 3.68234500  | -0.12347100 |
| C  | -7.34082100 | 6.95450300  | 5.57140300  | H           | -9.14440000  | 4.46859000  | 0.59169400  |
| H  | -8.29803200 | 6.18826800  | 3.79911600  | H           | -9.08848000  | 4.07179000  | -1.13051100 |
| C  | -6.56697400 | 6.64668400  | 6.69350500  | H           | -9.56298700  | 2.84251500  | 0.05353600  |
| H  | -5.53791100 | 5.08955400  | 7.77685400  | C           | -7.64963300  | 0.75953900  | -0.69875000 |

|    |              |             |             |              |             |             |             |
|----|--------------|-------------|-------------|--------------|-------------|-------------|-------------|
| H  | -7.59563100  | 0.65567600  | -1.79139200 | C            | -0.41864200 | 0.50463000  | 7.57190300  |
| H  | -7.22071200  | -0.14570100 | -0.25919300 | C            | 0.66021000  | -0.00947100 | 8.50452400  |
| H  | -8.70536700  | 0.80001200  | -0.41788200 | H            | 1.31747400  | 0.80962800  | 8.79969500  |
| Rh | -6.44864400  | 2.49996800  | 1.88863900  | H            | 0.20272900  | -0.46028500 | 9.39170900  |
| C  | -3.29820500  | 3.81919100  | 4.72187000  | H            | 1.24055200  | -0.79396700 | 8.00716400  |
| C  | -2.91410200  | 2.59920700  | 5.25251500  | O            | -0.50406600 | 1.67337600  | 7.22560700  |
| C  | -3.67953800  | 1.43430200  | 4.96688200  | O            | -1.24028500 | -0.46761500 | 7.19153300  |
| C  | -4.80856300  | 1.59725100  | 4.12503700  |              |             |             |             |
| C  | -5.22832100  | 2.85628300  | 3.62610100  | <b>INT28</b> |             |             |             |
| C  | -4.45854300  | 3.97326300  | 3.92868700  | C            | -4.61808600 | 2.39300500  | 0.55722700  |
| H  | -2.70039000  | 4.69968900  | 4.94711200  | C            | -5.49476200 | 3.58010800  | 0.53877600  |
| H  | -2.03872700  | 2.49885400  | 5.88872400  | C            | -6.80050000 | 3.17652000  | 0.11690700  |
| H  | -4.77195100  | 4.96736800  | 3.62195900  | C            | -6.80056300 | 1.73229600  | 0.10448900  |
| C  | -5.45592500  | 0.41583200  | 3.64693100  | C            | -5.40791000 | 1.27332000  | 0.29131100  |
| N  | -3.31855400  | 0.22309300  | 5.46897300  | C            | -5.00247000 | -0.16906800 | 0.27907700  |
| H  | -1.95852600  | -0.12669500 | 6.57164900  | H            | -5.57790500 | -0.74223400 | 1.01517900  |
| C  | -4.01621800  | -0.88333300 | 5.18902200  | H            | -5.18628200 | -0.61547700 | -0.70650900 |
| O  | -5.13102100  | -0.74939800 | 4.15904900  | H            | -3.94293600 | -0.29486300 | 0.51390100  |
| O  | -6.30419700  | 0.46452200  | 2.70873700  | C            | -3.15399900 | 2.44394300  | 0.87521800  |
| O  | -3.90120300  | -2.00814000 | 5.59346900  | H            | -2.72264800 | 1.44426700  | 0.96410600  |
| C  | -7.19752300  | 3.23125200  | 4.00915400  | H            | -2.60593700 | 2.97873000  | 0.08834500  |
| C  | -8.00914000  | 2.60871300  | 3.22957100  | H            | -2.96396500 | 2.97036700  | 1.81765400  |
| C  | -7.20306600  | 4.13989800  | 5.15492700  | C            | -4.99837400 | 4.98538100  | 0.70189800  |
| C  | -6.59361900  | 3.78922400  | 6.37272500  | H            | -4.27655800 | 5.05833100  | 1.52076100  |
| C  | -7.90133000  | 5.35708200  | 5.06424100  | H            | -4.49435900 | 5.32112400  | -0.21516000 |
| C  | -6.70007400  | 4.63048200  | 7.47635800  | H            | -5.81537100 | 5.68102600  | 0.90970200  |
| H  | -6.04463700  | 2.85639500  | 6.44517900  | C            | -7.92879900 | 4.06288600  | -0.30827400 |
| C  | -7.99451700  | 6.20201100  | 6.17062300  | H            | -7.81302700 | 5.07902600  | 0.07807700  |
| H  | -8.36137800  | 5.63654500  | 4.12071900  | H            | -7.95486000 | 4.12644600  | -1.40490400 |
| C  | -7.39719100  | 5.83924900  | 7.37868700  | H            | -8.89752500 | 3.68554800  | 0.02819100  |
| H  | -6.23530400  | 4.34381600  | 8.41532700  | C            | -7.93992600 | 0.85187000  | -0.30783000 |
| H  | -8.53466700  | 7.14121000  | 6.08772800  | H            | -7.95138800 | 0.72557600  | -1.39999700 |
| H  | -7.47221100  | 6.49501600  | 8.24170600  | H            | -7.85381500 | -0.14154300 | 0.14130100  |
| C  | -9.37938300  | 2.14182900  | 3.08318400  | H            | -8.90152400 | 1.27519300  | -0.00553000 |
| C  | -10.46388400 | 2.99891800  | 3.34812400  | Rh           | -6.38893000 | 2.34094700  | 2.12683500  |
| C  | -9.63717100  | 0.81889400  | 2.67563800  | C            | -3.72724100 | 4.31941800  | 4.85259500  |
| C  | -11.77378900 | 2.54258800  | 3.20484700  | C            | -3.05389900 | 3.12396500  | 5.04132100  |
| H  | -10.27332100 | 4.01709400  | 3.67302700  | C            | -3.75369000 | 1.89181300  | 4.95752600  |
| C  | -10.94959300 | 0.36932500  | 2.54200400  | C            | -5.13083300 | 1.93019800  | 4.58547300  |
| H  | -8.79908200  | 0.15372800  | 2.49433000  | C            | -5.84661400 | 3.17387500  | 4.47861600  |
| C  | -12.02110400 | 1.22904700  | 2.79990200  | C            | -5.11104000 | 4.35617200  | 4.60841400  |
| H  | -12.60214800 | 3.21436000  | 3.41343200  | H            | -3.17944400 | 5.25427400  | 4.94305000  |
| H  | -11.13611100 | -0.65786100 | 2.24047900  | H            | -1.99309000 | 3.09324100  | 5.27811600  |
| H  | -13.04276700 | 0.87565200  | 2.69094100  | H            | -5.63659100 | 5.30613300  | 4.58273700  |

|             |              |             |             |    |             |             |             |
|-------------|--------------|-------------|-------------|----|-------------|-------------|-------------|
| C           | -5.69571300  | 0.64556100  | 4.20101700  | C  | -5.46590200 | 2.00518100  | -0.15421600 |
| N           | -3.09122300  | 0.73331400  | 5.23023900  | C  | -4.53129100 | 0.86284000  | -0.42356000 |
| H           | -1.38108000  | 0.54734500  | 5.74461000  | H  | -4.83645000 | -0.03432200 | 0.12653200  |
| C           | -3.72305300  | -0.44079400 | 5.24752900  | H  | -4.52120900 | 0.60738400  | -1.49220900 |
| O           | -5.12276400  | -0.44847800 | 4.64161400  | H  | -3.50581200 | 1.09990600  | -0.12877500 |
| O           | -6.64215200  | 0.54463300  | 3.37361700  | C  | -3.73910400 | 3.93804200  | 0.17524400  |
| O           | -3.37189100  | -1.52926700 | 5.60941000  | H  | -2.97972900 | 3.17205200  | 0.35307400  |
| C           | -7.36909200  | 3.27083400  | 4.47216100  | H  | -3.51059100 | 4.41960600  | -0.78562600 |
| C           | -7.93571300  | 2.99758700  | 3.28495400  | H  | -3.62943900 | 4.69261200  | 0.95846600  |
| C           | -8.01765500  | 3.63979200  | 5.76121200  | C  | -6.47611000 | 5.57004800  | 0.53409000  |
| C           | -7.35533300  | 3.37887100  | 6.97649200  | H  | -5.59339000 | 5.98829200  | 1.02784000  |
| C           | -9.29047400  | 4.23771400  | 5.82367700  | H  | -6.57797500 | 6.07831500  | -0.43590800 |
| C           | -7.94797000  | 3.68236600  | 8.20095000  | H  | -7.35004100 | 5.83313200  | 1.13783900  |
| H           | -6.36959300  | 2.92445300  | 6.96689700  | C  | -8.89504700 | 3.60160800  | -0.03652100 |
| C           | -9.87913200  | 4.54461700  | 7.04904300  | H  | -9.17707100 | 4.21014400  | 0.82812400  |
| H           | -9.82231100  | 4.47055900  | 4.90962100  | H  | -9.08738000 | 4.20185800  | -0.93663100 |
| C           | -9.21411700  | 4.26798100  | 8.24518800  | H  | -9.56384800 | 2.73692000  | -0.06775400 |
| H           | -7.41549200  | 3.46020300  | 9.12191300  | C  | -7.65701500 | 0.66313900  | -0.63523800 |
| H           | -10.86183200 | 5.00904500  | 7.06664200  | H  | -7.50824300 | 0.41414100  | -1.69495800 |
| H           | -9.67481900  | 4.51001900  | 9.19906100  | H  | -7.30696200 | -0.19152300 | -0.04597000 |
| C           | -9.33719300  | 2.91061700  | 2.86102600  | H  | -8.73313700 | 0.76373600  | -0.46847200 |
| C           | -10.04348100 | 4.03155000  | 2.38317400  | Rh | -6.26511900 | 2.50571300  | 1.92353000  |
| C           | -9.99996100  | 1.66701200  | 2.89332500  | C  | -3.30484400 | 4.27583400  | 4.58790500  |
| C           | -11.37155700 | 3.91743900  | 1.96821000  | C  | -2.87594300 | 3.16229100  | 5.30460600  |
| H           | -9.54658900  | 4.99792600  | 2.35607000  | C  | -3.45296200 | 1.90600100  | 5.07037800  |
| C           | -11.32688200 | 1.55800100  | 2.47861000  | C  | -4.47408600 | 1.78763600  | 4.09263200  |
| H           | -9.46238500  | 0.79626300  | 3.25676000  | C  | -4.88938300 | 2.91784000  | 3.35245600  |
| C           | -12.01843400 | 2.68049400  | 2.01376600  | C  | -4.30422900 | 4.16088200  | 3.61632200  |
| H           | -11.90186000 | 4.79751300  | 1.61340800  | H  | -2.85500700 | 5.24554300  | 4.79029300  |
| H           | -11.82498400 | 0.59299500  | 2.52411900  | H  | -2.09822200 | 3.24098100  | 6.05705800  |
| H           | -13.05285600 | 2.59233300  | 1.69328600  | H  | -4.62276400 | 5.04751100  | 3.07365000  |
| C           | 0.36736600   | 1.34089800  | 6.01386200  | C  | -5.18830800 | 0.51617900  | 3.81988500  |
| C           | 1.76682600   | 0.96669600  | 6.45795600  | N  | -2.96465100 | 0.85797300  | 5.84290100  |
| H           | 2.42036800   | 1.83812800  | 6.39978700  | C  | -3.11674700 | -0.34075100 | 6.00316300  |
| H           | 1.74106100   | 0.58865100  | 7.48572000  | O  | -4.94469100 | -0.55890600 | 4.35809000  |
| H           | 2.15767200   | 0.16092700  | 5.82775600  | O  | -6.19934400 | 0.62919100  | 2.94140100  |
| O           | 0.04921700   | 2.47245900  | 5.67894700  | O  | -3.06162200 | -1.46200200 | 6.35285300  |
| O           | -0.45226200  | 0.29510500  | 6.03991400  | C  | -7.80126200 | 1.46962600  | 3.94681200  |
|             |              |             |             | C  | -7.75307000 | 2.63471100  | 3.40682000  |
| <b>TS15</b> |              |             |             | C  | -8.20553600 | 0.38436100  | 4.77376900  |
| C           | -5.12067900  | 3.35468600  | 0.14608700  | C  | -9.17712400 | -0.53321200 | 4.31781400  |
| C           | -6.35150000  | 4.08400600  | 0.35360000  | C  | -7.66227000 | 0.23223700  | 6.06774800  |
| C           | -7.45383200  | 3.18851000  | 0.01700600  | C  | -9.60234700 | -1.56690100 | 5.14359400  |
| C           | -6.91778200  | 1.91634200  | -0.26545600 | H  | -9.57921800 | -0.42093800 | 3.31586900  |



|              |              |             |             |              |              |             |            |
|--------------|--------------|-------------|-------------|--------------|--------------|-------------|------------|
| C            | -8.09456000  | -0.80519500 | 6.88754200  | Rh           | -6.21742500  | 2.46849600  | 1.79640600 |
| H            | -6.90959100  | 0.93361200  | 6.41154600  | C            | -3.24076400  | 4.01921400  | 4.58775700 |
| C            | -9.06134100  | -1.70307600 | 6.42704500  | C            | -2.85457600  | 2.87189100  | 5.27549300 |
| H            | -10.35043500 | -2.27089700 | 4.79073900  | C            | -3.47014300  | 1.64642400  | 4.99596000 |
| H            | -7.67304600  | -0.92006200 | 7.88155500  | C            | -4.50398200  | 1.60059800  | 4.01878900 |
| H            | -9.39276500  | -2.51504400 | 7.06863300  | C            | -4.87272700  | 2.76395600  | 3.29270300 |
| C            | -8.63504500  | 3.78824500  | 3.67036500  | C            | -4.23255500  | 3.96869100  | 3.60407400 |
| C            | -8.08598200  | 5.05348900  | 3.94049000  | H            | -2.76053400  | 4.96638400  | 4.82331600 |
| C            | -10.03401100 | 3.64705900  | 3.65694200  | H            | -2.08080800  | 2.90100500  | 6.03491700 |
| C            | -8.91605000  | 6.14209800  | 4.20657600  | H            | -4.51194500  | 4.88261800  | 3.08804400 |
| H            | -7.00675000  | 5.16449900  | 3.95570700  | C            | -5.20696600  | 0.34881300  | 3.71296700 |
| C            | -10.86010700 | 4.74317600  | 3.90767300  | N            | -3.02688500  | 0.55607100  | 5.72968600 |
| H            | -10.46825800 | 2.67403000  | 3.44566900  | C            | -3.11754900  | -0.64887100 | 5.83904000 |
| C            | -10.30544300 | 5.99389600  | 4.18632300  | O            | -4.86225700  | -0.78525800 | 3.93861600 |
| H            | -8.47517900  | 7.11087300  | 4.42688800  | O            | -6.43608800  | 0.54648400  | 3.01289800 |
| H            | -11.93947200 | 4.61647600  | 3.89000500  | O            | -3.05919600  | -1.79164200 | 6.10758600 |
| H            | -10.94972300 | 6.84593900  | 4.38504900  | C            | -7.47070300  | 1.24642000  | 3.78991600 |
|              |              |             |             | C            | -7.61629100  | 2.48219000  | 3.29634900 |
| <b>INT29</b> |              |             |             | C            | -8.07937000  | 0.45704700  | 4.86692000 |
| C            | -5.03739000  | 3.38683700  | 0.01903300  | C            | -8.05068300  | -0.94984900 | 4.83446000 |
| C            | -6.21983900  | 4.14566100  | 0.42242500  | C            | -8.70539400  | 1.09348000  | 5.95688600 |
| C            | -7.39516100  | 3.37659700  | 0.01648500  | C            | -8.64027000  | -1.69337400 | 5.85583700 |
| C            | -6.94584800  | 2.12237400  | -0.43123400 | H            | -7.55222000  | -1.45357500 | 4.01415000 |
| C            | -5.47880200  | 2.12752900  | -0.42654100 | C            | -9.29915100  | 0.34367300  | 6.96841000 |
| C            | -4.63764100  | 0.97966500  | -0.90447100 | H            | -8.71611600  | 2.17660400  | 6.01071500 |
| H            | -4.99102200  | 0.02654400  | -0.49601800 | C            | -9.27124400  | -1.05318200 | 6.92369100 |
| H            | -4.67501800  | 0.89568300  | -1.99949800 | H            | -8.60358100  | -2.77874800 | 5.81520400 |
| H            | -3.58945000  | 1.09555400  | -0.61656600 | H            | -9.77442500  | 0.85298400  | 7.80274800 |
| C            | -3.62661200  | 3.89307800  | 0.06849400  | H            | -9.72933700  | -1.63550900 | 7.71861600 |
| H            | -2.90289300  | 3.07950200  | -0.02985100 | C            | -8.59327500  | 3.51305600  | 3.65397200 |
| H            | -3.44351300  | 4.60286900  | -0.74993000 | C            | -8.16962200  | 4.79134900  | 4.06836200 |
| H            | -3.41149600  | 4.41033100  | 1.00838700  | C            | -9.97794400  | 3.27189200  | 3.55297200 |
| C            | -6.24131500  | 5.60507600  | 0.77392000  | C            | -9.09707500  | 5.78321800  | 4.38676300 |
| H            | -5.30630400  | 5.92029500  | 1.24616000  | H            | -7.10504900  | 4.98923700  | 4.15279700 |
| H            | -6.37352700  | 6.22077100  | -0.12770800 | C            | -10.90201700 | 4.26914800  | 3.86384200 |
| H            | -7.06131100  | 5.83984000  | 1.45924800  | H            | -10.32055900 | 2.29261100  | 3.23115800 |
| C            | -8.80591900  | 3.88147300  | 0.06546400  | C            | -10.46733100 | 5.52896800  | 4.28300900 |
| H            | -8.99809300  | 4.46292100  | 0.97121600  | H            | -8.74828900  | 6.75855100  | 4.71696500 |
| H            | -9.00754600  | 4.53345400  | -0.79612200 | H            | -11.96546600 | 4.06041000  | 3.77859100 |
| H            | -9.53138400  | 3.06381600  | 0.03843700  | H            | -11.18849300 | 6.30483900  | 4.52523700 |
| C            | -7.77965400  | 0.97206200  | -0.91636000 |              |              |             |            |
| H            | -7.74371200  | 0.89435400  | -2.01192800 | <b>INT30</b> |              |             |            |
| H            | -7.42175500  | 0.01904200  | -0.51215400 | C            | -3.48140100  | 4.14035000  | 5.32091300 |
| H            | -8.82803600  | 1.08213600  | -0.62650600 | C            | -2.50489400  | 3.22613600  | 4.93451700 |

|             |              |             |            |    |             |             |             |
|-------------|--------------|-------------|------------|----|-------------|-------------|-------------|
| C           | -2.86563500  | 1.97036900  | 4.43468800 | C  | -4.28368400 | -4.59343100 | 4.31363500  |
| C           | -4.24595700  | 1.63298000  | 4.33425800 | H  | -4.13390100 | -5.01044100 | 3.31360100  |
| C           | -5.23680100  | 2.56630300  | 4.75160400 | H  | -4.19143100 | -5.41782200 | 5.03448100  |
| C           | -4.83027200  | 3.82445300  | 5.23243400 | H  | -5.30830000 | -4.21314600 | 4.36579000  |
| H           | -3.18180400  | 5.11515100  | 5.69584900 | C  | -4.64255100 | -2.42824900 | 6.56142600  |
| H           | -1.44947500  | 3.46511300  | 5.00385000 | H  | -5.50095700 | -2.15882700 | 5.93190000  |
| H           | -5.57660400  | 4.54888000  | 5.53309500 | H  | -4.87896300 | -3.36936700 | 7.07350700  |
| C           | -4.66537000  | 0.35082400  | 3.78004800 | H  | -4.52502100 | -1.65271300 | 7.32285400  |
| N           | -1.81208900  | 1.14967600  | 4.07546000 | C  | -1.92740000 | -0.61791600 | 6.62655400  |
| C           | -1.57410100  | 0.04875400  | 3.61011800 | H  | -2.78800300 | -0.32512900 | 7.23357800  |
| O           | -3.95052100  | -0.53161600 | 3.34747800 | H  | -1.10677400 | -0.87657500 | 7.30946800  |
| O           | -6.02211800  | 0.11166900  | 3.73916600 | H  | -1.61066600 | 0.25966300  | 6.05181400  |
| O           | -1.09303500  | -0.93563900 | 3.19356900 | C  | 0.03595400  | -1.72143000 | 4.44515600  |
| C           | -6.65201900  | 2.21286000  | 4.65344100 | H  | 0.00878600  | -0.62960300 | 4.36164500  |
| C           | -6.99057700  | 0.98811500  | 4.16158000 | H  | 0.71615100  | -1.97260700 | 5.27073300  |
| C           | -7.68622800  | 3.22134800  | 5.03944200 | H  | 0.47220200  | -2.11470300 | 3.52296800  |
| C           | -7.88667500  | 3.56802100  | 6.38553700 | C  | -1.34792200 | -4.28069700 | 3.01700800  |
| C           | -8.45902300  | 3.85905600  | 4.05850100 | H  | -0.91490300 | -5.17714300 | 3.48197500  |
| C           | -8.84506500  | 4.51784400  | 6.74106600 | H  | -2.09866700 | -4.61589800 | 2.29556500  |
| H           | -7.29164300  | 3.08306700  | 7.15525000 | H  | -0.55294700 | -3.77868500 | 2.45864500  |
| C           | -9.41786900  | 4.80843700  | 4.41385800 | Rh | -3.25824000 | -1.54197800 | 3.61951300  |
| H           | -8.30807800  | 3.60229300  | 3.01386200 | C  | -7.66178400 | 1.61659100  | 2.93584300  |
| C           | -9.61461700  | 5.13964700  | 5.75541900 | C  | -7.07716100 | 0.40456100  | 3.20294500  |
| H           | -8.99165100  | 4.76987300  | 7.78798000 | C  | -5.64905600 | 0.22079800  | 3.19630100  |
| H           | -10.01011400 | 5.29044200  | 3.64071200 | C  | -4.86014800 | 1.42376500  | 2.94458400  |
| H           | -10.36143200 | 5.87897600  | 6.03169300 | C  | -5.50947600 | 2.68944200  | 2.67722700  |
| C           | -8.33108500  | 0.39062400  | 3.96872100 | C  | -6.89498100 | 2.76590100  | 2.65823300  |
| C           | -8.53429700  | -0.48866400 | 2.88892900 | H  | -8.74699200 | 1.69340400  | 2.93051000  |
| C           | -9.39891400  | 0.63300100  | 4.84959900 | H  | -7.67503600 | -0.47828100 | 3.40391400  |
| C           | -9.77663600  | -1.08255700 | 2.68165000 | H  | -7.38803500 | 3.70289100  | 2.43499400  |
| H           | -7.71138100  | -0.70451300 | 2.21658300 | C  | -3.44311400 | 1.40105400  | 2.98264000  |
| C           | -10.63742000 | 0.02979700  | 4.64164800 | N  | -5.26858000 | -1.04451100 | 3.42942900  |
| H           | -9.25910900  | 1.27973500  | 5.70701200 | O  | -2.66571600 | 0.44000600  | 3.21668900  |
| C           | -10.83450300 | -0.82425300 | 3.55528700 | O  | -2.74494500 | 2.54966200  | 2.76190100  |
| H           | -9.91609800  | -1.75212900 | 1.83743300 | C  | -4.68581100 | 3.87017800  | 2.41526600  |
| H           | -11.44872400 | 0.22338100  | 5.33799000 | C  | -3.33208700 | 3.76291400  | 2.47333400  |
| H           | -11.80253000 | -1.29134400 | 3.39560000 | C  | -5.34821500 | 5.15640100  | 2.03864000  |
|             |              |             |            | C  | -6.05691800 | 5.90716100  | 2.99065100  |
|             |              |             |            | C  | -5.28901500 | 5.62711000  | 0.71923700  |
| <b>TS16</b> |              |             |            | C  | -6.67683800 | 7.10571700  | 2.63417600  |
| C           | -3.41200900  | -2.57149200 | 5.71938000 | C  | -6.11627700 | 5.54750700  | 4.01444500  |
| C           | -2.25347700  | -1.76840000 | 5.71990400 | H  | -5.90935400 | 6.82536900  | 0.36218900  |
| C           | -1.33511400  | -2.27818600 | 4.69112000 | C  | -4.74937300 | 5.04989100  | -0.02609700 |
| C           | -1.94660600  | -3.38054200 | 4.05872300 | H  | -6.60317400 | 7.56916900  | 1.31842100  |
| C           | -3.29396900  | -3.50427300 | 4.61326000 | C  |             |             |             |

|              |             |             |             |             |             |             |             |
|--------------|-------------|-------------|-------------|-------------|-------------|-------------|-------------|
| H            | -7.21657700 | 7.67733300  | 3.38467700  | C           | -7.61122500 | 1.79568400  | 3.53473700  |
| H            | -5.85132100 | 7.17630600  | -0.66473500 | C           | -7.04908500 | 0.58001200  | 3.78969100  |
| H            | -7.08584600 | 8.50224900  | 1.04032300  | C           | -5.63017000 | 0.32046000  | 3.56821600  |
| C            | -2.28540900 | 4.78495100  | 2.24840600  | C           | -4.84224100 | 1.49432600  | 3.15366700  |
| C            | -2.45079900 | 6.13109900  | 2.61846200  | C           | -5.48481700 | 2.77425900  | 2.91344200  |
| C            | -1.06054600 | 4.39221800  | 1.67622400  | C           | -6.84926100 | 2.90453700  | 3.07681300  |
| C            | -1.43065900 | 7.05580100  | 2.40224100  | H           | -8.68183500 | 1.92423500  | 3.68205800  |
| H            | -3.37232000 | 6.45415200  | 3.08677300  | H           | -7.64607600 | -0.26111400 | 4.12700300  |
| C            | -0.04615800 | 5.32160200  | 1.45761400  | H           | -7.34177300 | 3.84596700  | 2.87154700  |
| H            | -0.91100100 | 3.35332800  | 1.40331600  | C           | -3.45052100 | 1.41520900  | 3.04329400  |
| C            | -0.22671500 | 6.65871300  | 1.81716600  | N           | -5.25951400 | -0.91669200 | 3.77461700  |
| H            | -1.57698900 | 8.09038000  | 2.70078600  | O           | -2.68041300 | 0.42131500  | 3.23807200  |
| H            | 0.88819500  | 4.99875000  | 1.00618100  | O           | -2.72159000 | 2.51907700  | 2.70662300  |
| H            | 0.56566100  | 7.38316400  | 1.64906000  | C           | -4.64674200 | 3.90083600  | 2.49685800  |
| C            | -4.16548100 | -1.77979000 | 1.95969400  | C           | -3.29914400 | 3.73988100  | 2.42229200  |
| O            | -4.59999000 | -2.03016900 | 0.91408500  | C           | -5.29602200 | 5.19480300  | 2.12493200  |
|              |             |             |             | C           | -5.87573800 | 6.01714400  | 3.10476800  |
| <b>INT31</b> |             |             |             | C           | -5.35460400 | 5.60310500  | 0.78487900  |
| C            | -3.62481300 | -2.76616300 | 5.53178600  | C           | -6.48296600 | 7.22383400  | 2.75385300  |
| C            | -2.60169800 | -1.79296300 | 5.70369900  | H           | -5.84431400 | 5.70599300  | 4.14542900  |
| C            | -1.46518200 | -2.16125600 | 4.85179500  | C           | -5.96257900 | 6.80932200  | 0.43319400  |
| C            | -1.83577300 | -3.28158600 | 4.08978900  | H           | -4.91538900 | 4.97069800  | 0.01866100  |
| C            | -3.22977800 | -3.60456900 | 4.43210300  | C           | -6.52650400 | 7.62439400  | 1.41630900  |
| C            | -3.99160200 | -4.80432300 | 3.94462600  | H           | -6.92135500 | 7.85110000  | 3.52576200  |
| H            | -3.70877900 | -5.07564500 | 2.92331400  | H           | -5.99619100 | 7.11095000  | -0.61043900 |
| H            | -3.79500600 | -5.67684000 | 4.58341000  | H           | -6.99929900 | 8.56387600  | 1.14255800  |
| H            | -5.06867700 | -4.61682500 | 3.95439600  | C           | -2.24842700 | 4.71085500  | 2.04143300  |
| C            | -4.95946800 | -2.79074400 | 6.19888400  | C           | -2.32144000 | 6.07453800  | 2.37503500  |
| H            | -5.67089400 | -2.21665600 | 5.57902600  | C           | -1.11035000 | 4.25021100  | 1.35262700  |
| H            | -5.33270800 | -3.81407500 | 6.30775600  | C           | -1.29958700 | 6.94956200  | 2.01058300  |
| H            | -4.91952500 | -2.33444000 | 7.19216300  | H           | -3.17208200 | 6.45026200  | 2.93032200  |
| C            | -2.58525100 | -0.66864600 | 6.69742300  | C           | -0.09389800 | 5.12962400  | 0.98631800  |
| H            | -3.59765000 | -0.39801000 | 7.00788100  | H           | -1.03051000 | 3.19700300  | 1.10634300  |
| H            | -2.01591600 | -0.94469900 | 7.59597900  | C           | -0.18419100 | 6.48469000  | 1.31105100  |
| H            | -2.11754600 | 0.22458700  | 6.27139300  | H           | -1.37401900 | 7.99897800  | 2.28308400  |
| C            | -0.16999000 | -1.40741500 | 4.81813700  | H           | 0.77142200  | 4.75381400  | 0.44663900  |
| H            | -0.34413400 | -0.34889500 | 4.59177000  | H           | 0.60974800  | 7.17054800  | 1.02766100  |
| H            | 0.33932800  | -1.46052300 | 5.78916900  | C           | -3.70677000 | -1.84753200 | 1.69972800  |
| H            | 0.51064100  | -1.80474500 | 4.06065100  | O           | -3.94173400 | -2.05852500 | 0.59500700  |
| C            | -0.97961700 | -4.05965700 | 3.13251200  |             |             |             |             |
| H            | -0.52910400 | -4.92714500 | 3.63436300  | <b>TS17</b> |             |             |             |
| H            | -1.55969300 | -4.44225900 | 2.28723500  | C           | -3.67169700 | -2.51215000 | 5.84086400  |
| H            | -0.16624200 | -3.45047600 | 2.72905400  | C           | -2.57217200 | -1.65530200 | 5.97643300  |
| Rh           | -3.32836900 | -1.54447900 | 3.53796500  | C           | -1.46468000 | -2.21758000 | 5.21992200  |

|    |             |             |             |              |             |             |             |
|----|-------------|-------------|-------------|--------------|-------------|-------------|-------------|
| C  | -1.88884200 | -3.48453000 | 4.67598700  | H            | -1.67456500 | 0.21632500  | 1.07143200  |
| C  | -3.28888200 | -3.59514800 | 4.93557400  | H            | -0.33432100 | -0.01333400 | -0.08840200 |
| C  | -4.19241900 | -4.73537200 | 4.57749900  |              |             |             |             |
| H  | -3.76668800 | -5.36191900 | 3.79004200  | <b>INT32</b> |             |             |             |
| H  | -4.36902100 | -5.37173300 | 5.45557400  | C            | -3.60165000 | -2.81202800 | 5.87650400  |
| H  | -5.16644600 | -4.36854500 | 4.23745400  | C            | -2.49039800 | -1.92315400 | 6.09385800  |
| C  | -5.07219500 | -2.25072200 | 6.21386500  | C            | -1.39607700 | -2.33713300 | 5.21060300  |
| H  | -5.56388900 | -1.89530400 | 5.27700900  | C            | -1.87396000 | -3.38570000 | 4.40473600  |
| H  | -5.60526100 | -3.15289600 | 6.53224500  | C            | -3.26161000 | -3.66266900 | 4.77940000  |
| H  | -5.17999300 | -1.47795700 | 6.97835300  | C            | -4.09358100 | -4.78287300 | 4.23519500  |
| C  | -2.49932500 | -0.36199200 | 6.72367400  | H            | -4.06248900 | -4.78601200 | 3.14372300  |
| H  | -3.45246800 | -0.10989700 | 7.19464900  | H            | -3.72322600 | -5.74952100 | 4.60554300  |
| H  | -1.73421000 | -0.41159700 | 7.50914900  | H            | -5.13802200 | -4.68220000 | 4.54224300  |
| H  | -2.22066700 | 0.46272900  | 6.05643300  | C            | -4.91629700 | -2.80337400 | 6.59817300  |
| C  | -0.06904200 | -1.68705200 | 5.21057600  | H            | -5.69404000 | -2.33907400 | 5.97813100  |
| H  | -0.06057200 | -0.59998400 | 5.32581700  | H            | -5.23332200 | -3.82356100 | 6.83861100  |
| H  | 0.50205900  | -2.12043600 | 6.04537100  | H            | -4.85318200 | -2.24258500 | 7.53471400  |
| H  | 0.43772600  | -1.93583400 | 4.27514300  | C            | -2.36030000 | -0.86553400 | 7.14852600  |
| C  | -0.99314900 | -4.49840000 | 4.04407300  | H            | -3.32967400 | -0.60648000 | 7.58195700  |
| H  | -0.31611600 | -4.91758900 | 4.80097800  | H            | -1.70529400 | -1.20991800 | 7.96028100  |
| H  | -1.55843700 | -5.32445400 | 3.60437100  | H            | -1.92535100 | 0.04606100  | 6.72741300  |
| H  | -0.38725300 | -4.02625400 | 3.26532400  | C            | -0.05741500 | -1.66366500 | 5.16898000  |
| Rh | -2.89109400 | -1.77082900 | 3.39422300  | H            | -0.17149800 | -0.60408200 | 4.90858600  |
| C  | -7.41507800 | 1.14909000  | 2.83732800  | H            | 0.44104500  | -1.72029300 | 6.14495800  |
| C  | -6.74471700 | -0.05456700 | 2.94906300  | H            | 0.60114600  | -2.12451500 | 4.42862100  |
| C  | -5.33674500 | -0.10877000 | 3.21007000  | C            | -1.13387800 | -4.13164300 | 3.33636700  |
| C  | -4.63275800 | 1.13371200  | 3.30701900  | H            | -0.23758100 | -3.59568900 | 3.01439600  |
| C  | -5.33493800 | 2.33510800  | 3.16865500  | H            | -0.82107400 | -5.11624700 | 3.71075700  |
| C  | -6.70862900 | 2.35791500  | 2.94134400  | H            | -1.77420800 | -4.29157500 | 2.46488000  |
| H  | -8.48592300 | 1.15592100  | 2.65201000  | Rh           | -3.23839900 | -1.45226700 | 4.06272100  |
| H  | -7.26838100 | -1.00131300 | 2.85995300  | C            | -7.07561100 | 1.50648700  | 2.16342500  |
| H  | -7.22773600 | 3.30667600  | 2.84151600  | C            | -6.66157500 | 0.50982700  | 3.02626300  |
| C  | -3.15773600 | 1.24623100  | 3.54074000  | C            | -5.27298000 | 0.32799100  | 3.32867100  |
| N  | -4.85694700 | -1.36578100 | 3.40320700  | C            | -4.31829400 | 1.27828600  | 2.81700400  |
| O  | -2.38322800 | 0.21286500  | 3.28209700  | C            | -4.77710500 | 2.29701300  | 1.98768000  |
| O  | -2.66931300 | 2.30608700  | 3.92264500  | C            | -6.12589000 | 2.39721400  | 1.63661000  |
| C  | -3.68718400 | -2.34591800 | 1.75074300  | H            | -8.12512300 | 1.60843700  | 1.90356600  |
| O  | -4.08882600 | -2.71843500 | 0.74415300  | H            | -7.35850900 | -0.20043700 | 3.45901400  |
| H  | -4.76613300 | 3.25467400  | 3.25870400  | H            | -6.44637600 | 3.19117500  | 0.96720000  |
| C  | -0.33078200 | -1.39892400 | 1.54396600  | C            | -2.86664400 | 1.35938100  | 3.26478200  |
| O  | 0.88787800  | -1.50394300 | 1.54822100  | N            | -4.99025800 | -0.77529700 | 4.04633500  |
| O  | -1.03814600 | -2.13785600 | 2.39232900  | O            | -2.40719900 | 0.42438200  | 4.05350000  |
| C  | -1.06287600 | -0.52074600 | 0.54637900  | O            | -2.20747300 | 2.34100100  | 2.94115300  |
| H  | -1.72258000 | -1.12994900 | -0.08319300 | H            | -4.04748400 | 3.01984600  | 1.63806000  |

|             |             |             |             |              |             |             |             |
|-------------|-------------|-------------|-------------|--------------|-------------|-------------|-------------|
| C           | -3.39731500 | -2.16489100 | 1.17122100  | C            | -2.88366700 | 1.30882700  | 3.84045600  |
| O           | -3.85587800 | -3.26845600 | 1.45676000  | N            | -5.07382000 | -0.78369000 | 3.81817600  |
| O           | -3.00235900 | -1.24846700 | 2.02125900  | H            | -5.78435300 | -1.04783600 | 4.57713400  |
| C           | -3.21517600 | -1.71743700 | -0.27663400 | O            | -2.49506000 | 0.16703100  | 4.38961000  |
| H           | -3.76808100 | -0.78936200 | -0.45458800 | O            | -2.18280400 | 2.30028100  | 4.00260300  |
| H           | -2.15858200 | -1.50636000 | -0.47278000 | C            | -8.79625700 | -1.82775500 | 6.29305300  |
| H           | -3.56915200 | -2.49805800 | -0.95279100 | H            | -8.76304700 | -1.01501400 | 7.02714300  |
|             |             |             |             | H            | -8.50135400 | -2.74504700 | 6.81674500  |
| <b>TS18</b> |             |             |             | H            | -9.81276800 | -1.93841700 | 5.91036300  |
| C           | -3.62747900 | -3.43582900 | 5.39382200  | C            | -7.82680600 | -1.53487200 | 5.14993800  |
| C           | -3.08349000 | -2.32922700 | 6.12743800  | O            | -8.21835400 | -1.47544100 | 3.98350400  |
| C           | -1.68762900 | -2.18674200 | 5.73429100  | O            | -6.58487600 | -1.36572700 | 5.53272700  |
| C           | -1.42011400 | -3.10490000 | 4.67325900  | C            | -4.72854500 | -2.29181300 | 2.88892300  |
| C           | -2.61360500 | -3.88235600 | 4.44655800  | O            | -5.30906600 | -2.98479900 | 2.16047600  |
| C           | -2.71655600 | -5.06624200 | 3.53971700  | H            | -3.62729800 | 3.34699900  | 2.40881500  |
| H           | -2.26532300 | -4.83848500 | 2.57263100  | C            | -2.10041600 | -1.86667600 | 1.15739600  |
| H           | -2.19139900 | -5.91914500 | 3.99153900  | O            | -1.83081400 | -3.05289400 | 1.33192000  |
| H           | -3.75564200 | -5.35960600 | 3.37575100  | O            | -2.68903800 | -1.07176400 | 2.01600100  |
| C           | -4.95334500 | -4.07888400 | 5.64983700  | C            | -1.75693700 | -1.15994000 | -0.15021900 |
| H           | -5.72016000 | -3.32135700 | 5.84457100  | H            | -2.06052000 | -0.11236600 | -0.14500600 |
| H           | -5.27502400 | -4.70118700 | 4.81144600  | H            | -0.67703100 | -1.23244900 | -0.31534100 |
| H           | -4.86799200 | -4.72508400 | 6.53437400  | H            | -2.25280300 | -1.68664700 | -0.97210300 |
| C           | -3.76464000 | -1.56085200 | 7.21765400  |              |             |             |             |
| H           | -4.84317700 | -1.50201200 | 7.04254600  | <b>INT33</b> |             |             |             |
| H           | -3.58976400 | -2.04671000 | 8.18782500  | C            | -3.54985300 | -2.73720200 | 6.13334900  |
| H           | -3.37121600 | -0.54227900 | 7.27271400  | C            | -2.44464200 | -1.88152300 | 6.48723000  |
| C           | -0.75785700 | -1.16986800 | 6.28301100  | C            | -1.30863000 | -2.22761800 | 5.64104100  |
| H           | -0.97537100 | -0.20701000 | 5.78537200  | C            | -1.74691300 | -3.21213200 | 4.72926700  |
| H           | -0.91399400 | -1.03110300 | 7.35730800  | C            | -3.14973400 | -3.51575000 | 5.00256600  |
| H           | 0.28739700  | -1.43046800 | 6.10201500  | C            | -3.93771600 | -4.58979700 | 4.31777800  |
| C           | -0.10567200 | -3.30167100 | 3.98314600  | H            | -3.79983900 | -4.52548500 | 3.23612100  |
| H           | 0.44887500  | -4.12146800 | 4.46072300  | H            | -3.60966000 | -5.58215300 | 4.65881700  |
| H           | -0.25894400 | -3.54702000 | 2.93095500  | H            | -5.00530800 | -4.49000900 | 4.52156800  |
| H           | 0.51156100  | -2.40148200 | 4.03889900  | C            | -4.85296700 | -2.82646800 | 6.86867100  |
| Rh          | -3.20744300 | -1.72456100 | 3.95593700  | H            | -5.10745500 | -1.87815300 | 7.35046700  |
| C           | -6.57800500 | 1.81263900  | 1.67475900  | H            | -5.67504600 | -3.09732000 | 6.20426100  |
| C           | -6.37535900 | 0.61457000  | 2.35624800  | H            | -4.78412500 | -3.58948300 | 7.65607700  |
| C           | -5.17616600 | 0.40401400  | 3.05778900  | C            | -2.37683200 | -0.90745300 | 7.62363300  |
| C           | -4.17563100 | 1.39879400  | 3.07726600  | H            | -3.37007500 | -0.66188600 | 8.00767200  |
| C           | -4.40253700 | 2.58916100  | 2.37729200  | H            | -1.78950600 | -1.32767400 | 8.45142100  |
| C           | -5.58832100 | 2.79844800  | 1.67565700  | H            | -1.89576800 | 0.02203500  | 7.30417100  |
| H           | -7.51123800 | 1.97202300  | 1.14156800  | C            | 0.03731400  | -1.57407100 | 5.73479300  |
| H           | -7.14198500 | -0.15244600 | 2.40998800  | H            | -0.05587600 | -0.48925800 | 5.60536600  |
| H           | -5.74153300 | 3.72987600  | 1.13784700  | H            | 0.49540000  | -1.76121600 | 6.71443100  |

|    |             |             |             |
|----|-------------|-------------|-------------|
| H  | 0.72048900  | -1.94838700 | 4.96848800  |
| C  | -0.93654200 | -3.87751500 | 3.65973400  |
| H  | -0.61331900 | -4.87114000 | 3.99985600  |
| H  | -1.52721600 | -4.00649000 | 2.75005600  |
| H  | -0.04200200 | -3.30041900 | 3.41293000  |
| Rh | -3.02864300 | -1.25113300 | 4.43469600  |
| C  | -6.41027100 | 2.01809100  | 2.10733500  |
| C  | -6.19157800 | 0.91144200  | 2.90574600  |
| C  | -4.88917400 | 0.64069300  | 3.45187300  |
| C  | -3.83744300 | 1.61418300  | 3.24626100  |
| C  | -4.10702000 | 2.72708800  | 2.45935100  |
| C  | -5.36158500 | 2.91955800  | 1.87192900  |
| H  | -7.39027500 | 2.18895200  | 1.67186600  |
| H  | -6.98749300 | 0.19786900  | 3.10133700  |
| H  | -5.52999900 | 3.79405300  | 1.24862000  |
| C  | -2.49917400 | 1.61472700  | 3.96504500  |
| N  | -4.75856900 | -0.54242500 | 4.07686000  |
| H  | -6.15459900 | -1.79076100 | 4.13049300  |
| O  | -2.21104600 | 0.60214800  | 4.73694600  |
| O  | -1.77552200 | 2.59946900  | 3.86645100  |
| C  | -8.79657100 | -3.68461200 | 3.86704600  |
| H  | -8.77996600 | -4.09249300 | 4.88321500  |
| H  | -8.36489400 | -4.44188500 | 3.20375500  |
| H  | -9.82355200 | -3.47315000 | 3.56776700  |
| C  | -7.97493300 | -2.41758700 | 3.79809800  |
| O  | -8.40621800 | -1.34280300 | 3.42307400  |
| O  | -6.71102500 | -2.62208400 | 4.19633000  |
| H  | -3.31158000 | 3.45493000  | 2.34015800  |
| C  | -2.78819100 | -1.73431000 | 1.52411500  |
| O  | -3.39296500 | -2.79416300 | 1.66493100  |
| O  | -2.43478900 | -0.91410400 | 2.48680200  |
| C  | -2.35243700 | -1.22365800 | 0.15378400  |
| H  | -2.83243200 | -0.26126300 | -0.05290500 |
| H  | -1.27079000 | -1.05471500 | 0.13947200  |
| H  | -2.62824500 | -1.94735600 | -0.61554500 |
